# Supplementary material for: Far-red/near-infrared emitting, two-photon absorbing, and bio-stable amino-Si-pyronin dyes
Source: Royal Society of Chemistry journal article supplement (doi:10.1039/c9sc02287b), 2019-01-01

## Electronic Supporting Information

# Far-Red/Near-Infrared Emitting, Two-Photon Absorbing, and Bio-Stable Amino-Si-Pyronin Dyes

Kyeong Hwan Kim,<sup>a</sup> Subhankar Singha,<sup>\*a</sup> Yong Woong Jun,<sup>a</sup> Ye Jin Reo,<sup>a</sup> Hye Rim Kim,<sup>a</sup>  
Hye Gun Ryu,<sup>a</sup> Snehasis Bhunia<sup>b</sup> and Kyo Han Ahn<sup>\*a</sup>

<sup>a</sup>Department of Chemistry, Pohang University of Science and Technology (POSTECH), 77 Cheongam-Ro, Nam-Gu, Pohang, Gyungbuk 37673, Republic of Korea. E-mail: subhankar@postech.ac.kr, ahn@postech.ac.kr

<sup>b</sup>National Institute for Nanomaterials Technology (NINT), Pohang University of Science and Technology, 77 Cheongam-Ro, Nam-Gu, Pohang, Gyungbuk 37673, Republic of Korea.

| <b>Contents</b>                                                                       | <b>Page No</b> |
|---------------------------------------------------------------------------------------|----------------|
| Supporting tables and figures                                                         | S2-S15         |
| Experimental procedures                                                               | S16-S27        |
| General methods                                                                       |                |
| One-photon spectroscopic analysis                                                     |                |
| Fluorescence assays with the probe <b>ASiP<sup>j</sup>-H<sub>2</sub>O<sub>2</sub></b> |                |
| Quantum yield measurement                                                             |                |
| Two-photon property measurement                                                       |                |
| Preparation of cell samples and their confocal microscopic imaging                    |                |
| Two-photon microscopic imaging of cells                                               |                |
| Cell viability assay                                                                  |                |
| Synthetic procedures for the dyes                                                     |                |
| References                                                                            |                |
| <sup>1</sup> H NMR and <sup>13</sup> C NMR spectra                                    | S28-S51        |
| HR Mass data (ESI <sup>+</sup> )                                                      | S52-S62        |
| LCMS analysis data for selected compounds                                             | S63-S64        |

## Supporting tables and figures

**Table S1** Structure and photophysical properties of ASiP<sup>a</sup> 4–10 dyes

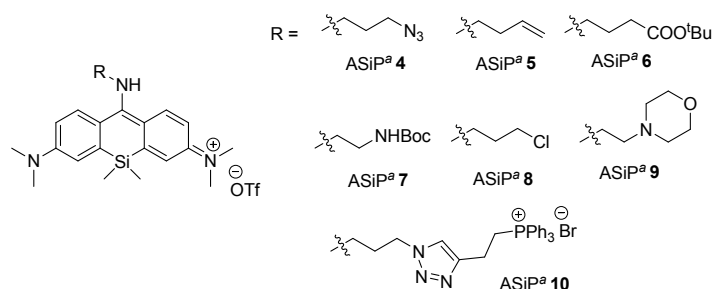

| Comp.                | $\lambda_{\text{abs}}$ (nm) <sup>a</sup> | $\lambda_{\text{em}}$ (nm) <sup>b</sup> | $\Phi_{\text{F}}$ <sup>c</sup> |
|----------------------|------------------------------------------|-----------------------------------------|--------------------------------|
| ASiP <sup>a</sup> 4  | 459                                      | 612                                     | 0.36                           |
| ASiP <sup>a</sup> 5  | 459                                      | 613                                     | 0.53                           |
| ASiP <sup>a</sup> 6  | 462                                      | 608                                     | 0.26                           |
| ASiP <sup>a</sup> 7  | 462                                      | 606                                     | 0.59                           |
| ASiP <sup>a</sup> 8  | 462                                      | 612                                     | 0.53                           |
| ASiP <sup>a</sup> 9  | 464                                      | 617                                     | 0.31                           |
| ASiP <sup>a</sup> 10 | 469                                      | 609                                     | n.d. <sup>d</sup>              |

<sup>a</sup>The maximum absorption wavelength and <sup>b</sup>the maximum emission wavelength in PBS (pH 7.4). <sup>c</sup>Fluorescence quantum yields determined in ethanol using rhodamine 101 as reference dye ( $\Phi = 0.915$  in ethanol). <sup>d</sup>n.d. = not determined.

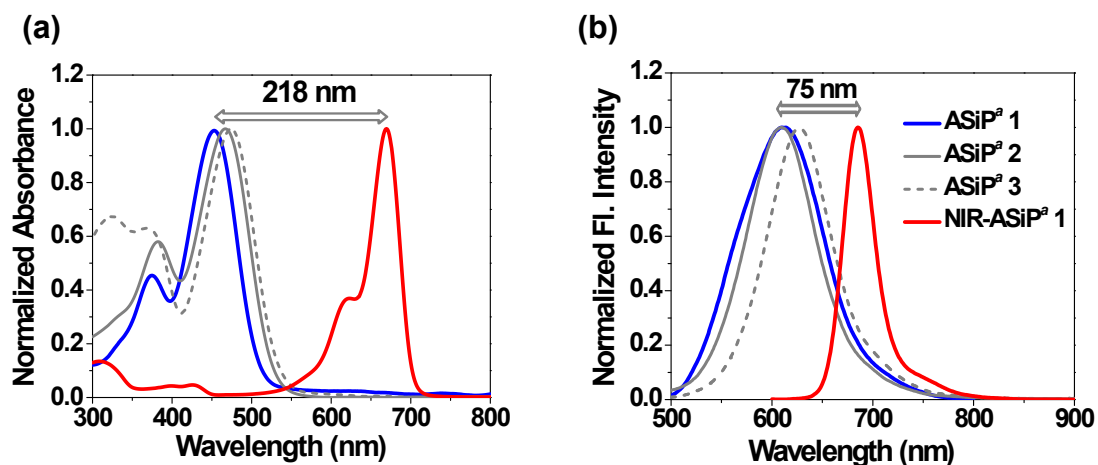

**Fig. S1** Normalized (a) absorption and (b) emission spectra of ASiP<sup>a</sup> 1 (blue line), ASiP<sup>a</sup> 2 (gray solid line), ASiP<sup>a</sup> 3 (gray dash line) and NIR-ASiP<sup>a</sup> 1 (red line) in PBS (pH 7.4) containing 1% DMSO. The emission spectra were obtained by excitation at the maximum absorbance wavelength of each dye.

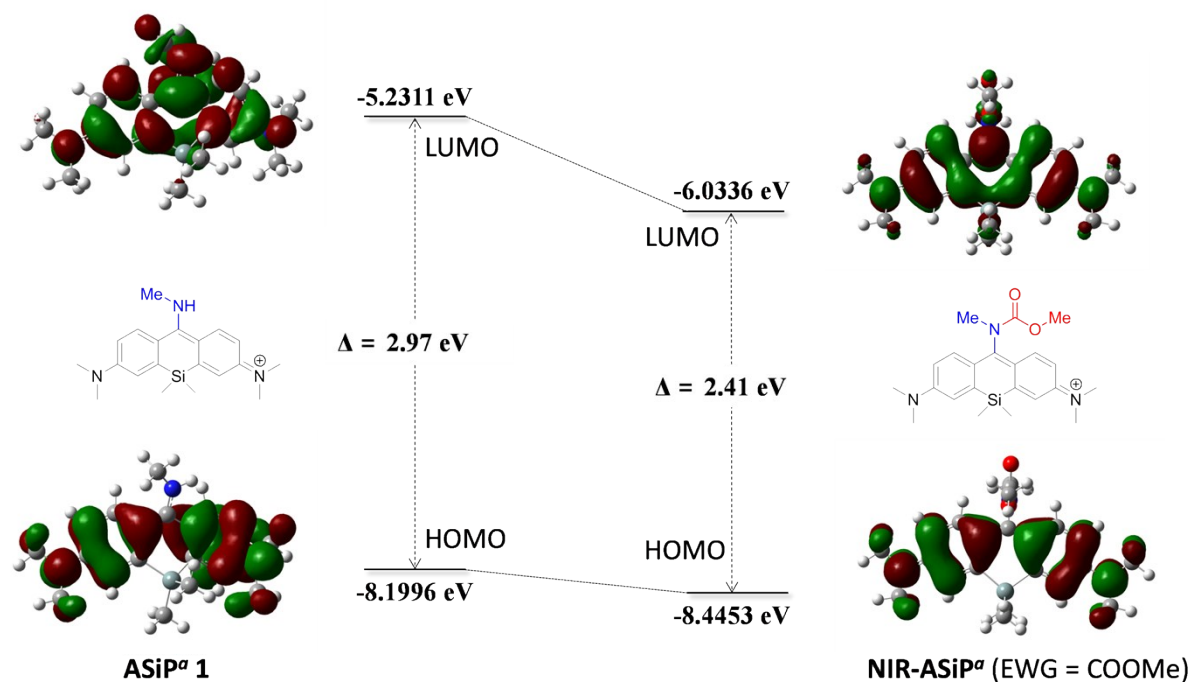

**Fig. S2** Calculated HOMO-LUMO energy levels and the corresponding electronic distribution of ASiP<sup>α</sup> 1 and a simplified NIR-ASiP<sup>α</sup> (EWG = -CO<sub>2</sub>Me). The calculations were performed using Gaussian 09 (B3LYP method).

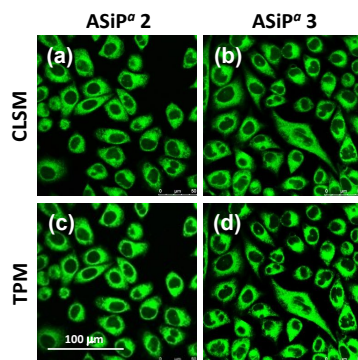

**Fig. S3** (a, b) Confocal laser-scanning microscopic (CLSM) images of HeLa cells incubated with ASiP<sup>α</sup> 2 and ASiP<sup>α</sup> 3, respectively. The emissions were collected in the range of 498–800 nm upon excitation at 488 nm. (c, d) Two-photon microscopic (TPM) images of HeLa cells treated with ASiP<sup>α</sup> 2 and ASiP<sup>α</sup> 3, respectively. The emissions were collected in the range of 500–675 nm upon two-photon excitation at 900 nm. The HeLa Cells were incubated with 10 μM of each ASiP<sup>α</sup> dye for 30 min.

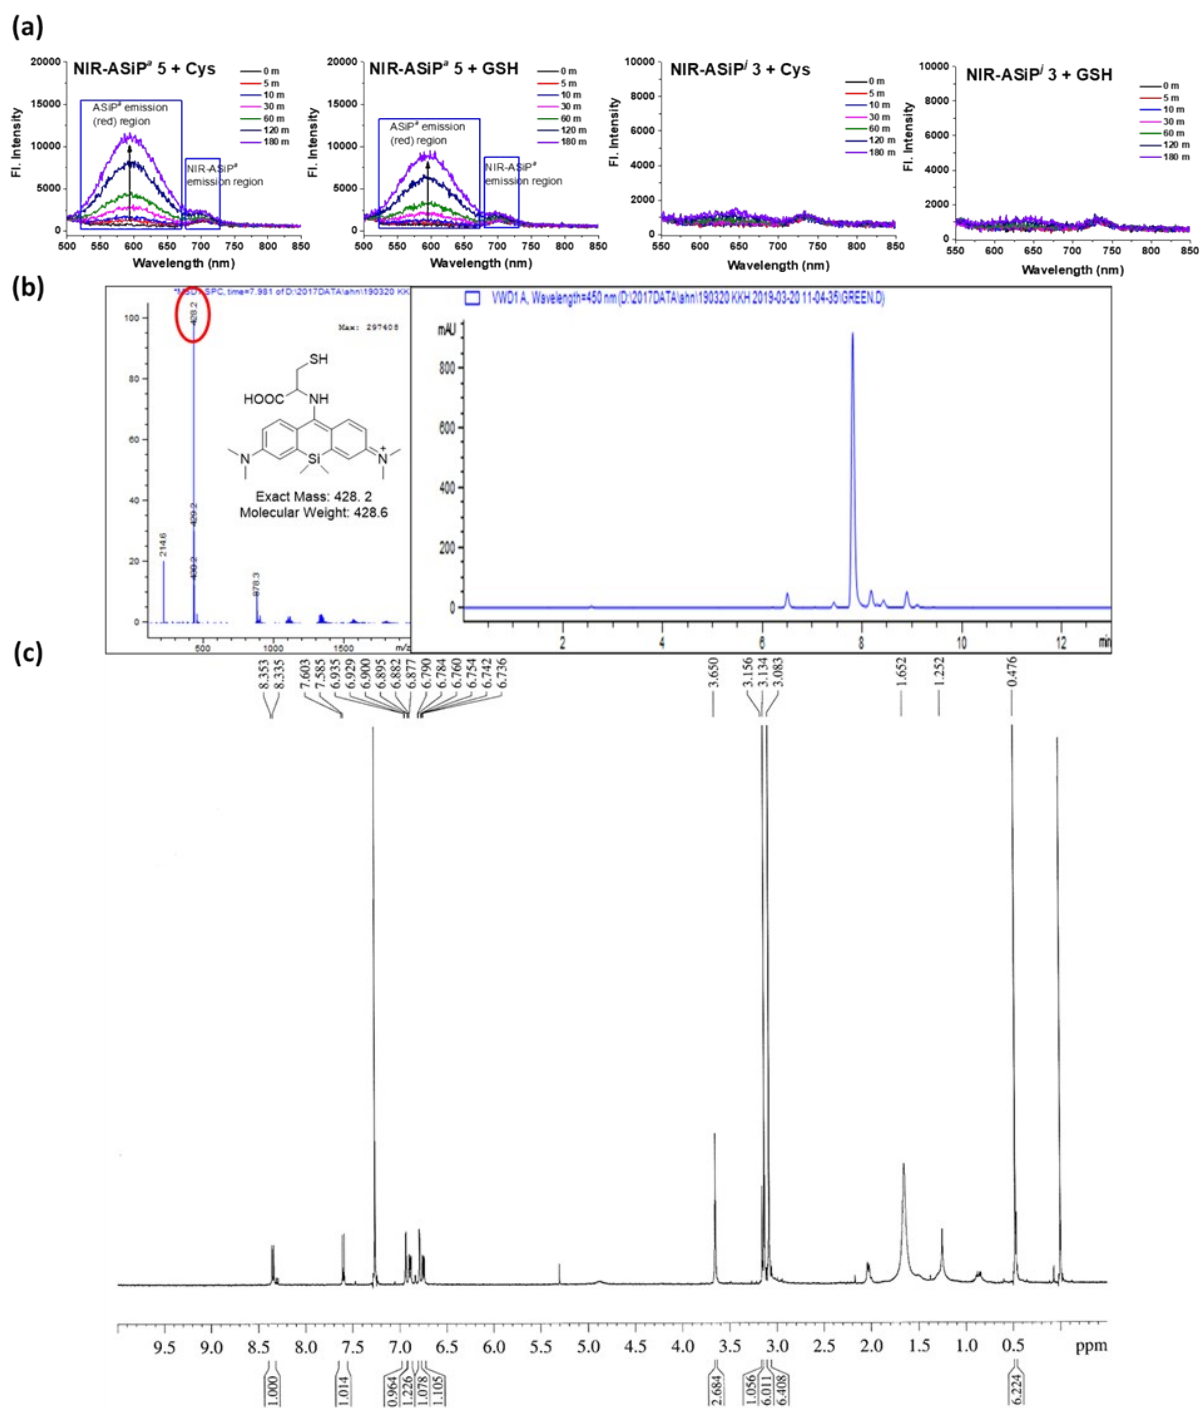

**Fig. S4** (a) Time-dependent (up to 30 min) fluorescence spectral changes of NIR-ASiP<sup>a</sup> **5** (10  $\mu$ M) and NIR-ASiP<sup>j</sup> **3** (10  $\mu$ M) upon addition of glutathione (GSH, 500  $\mu$ M) and cysteine (Cys, 500  $\mu$ M), respectively, in 1:1 PBS/dioxane (v/v) at 37  $^{\circ}$ C. The spectral changes suggest that NIR-ASiP<sup>a</sup> **5** undergo substitution with these thiols. In the case of Cys, NIR-ASiP<sup>a</sup> **5** was converted into the corresponding ASiP<sup>a</sup>-type adduct through thiol addition followed by intramolecular amine substitution. Such amine adducts emit in the shorter wavelength (around 600 nm) region under excitation at 460 nm. The julolidine-derived analogue NIR-ASiP<sup>j</sup> **3** that contains the same amine and electron-withdrawing moiety exhibited little response toward Cys and GSH. (b) LCMS data of a mixture of NIR-ASiP<sup>a</sup> **5** (10

$\mu\text{M}$ ) and Cys (500  $\mu\text{M}$ ) in 1:1 water/dioxane (v/v) stirred at 36 °C for 24 h, showing the formation of the Cys-substituted ASiP<sup>a</sup> as the major product with mass peak ( $m/z$ ) at 428.2 under the reverse-phase chromatogram (with absorption at 450 nm). (c) <sup>1</sup>H NMR (CDCl<sub>3</sub>, 500 MHz, 298 K) spectrum of the Cys-substituted ASiP<sup>a</sup> **5** (Experimental: a mixture of NIR-ASiP<sup>a</sup> **5** (0.03 mmol) and Cys (50 equiv.) in 1:1 water/dioxane (v/v) was stirred at 36 °C for 24 h. The Cys-adduct was formed as the major product, which was isolated by HPLC):  $\delta$  8.35 (d,  $J = 9.0$  Hz, 1H), 7.60 (d,  $J = 9.0$  Hz, 1H), 6.94 (d,  $J = 9.0$  Hz, 1H), 6.90 (dd,  $J = 9.0, 3.0$  Hz, 1H), 6.79 (d,  $J = 9.0$  Hz, 1H), 6.76 (dd,  $J = 9.0, 3.0$  Hz, 1H), 3.66 (s, 2H), 3.16 (s, 1H), 3.13 (s, 6H), 3.08 (s, 6H), 0.48 (s, 6H).

**Analysis methods:** HPLC and LCMS were performed on an Agilent system with C18 reversed phase column (Eclipse XDB, 3.5  $\mu\text{m}$ , 4.6 mm  $\times$  150 mm). The signals were recorded at 450 nm as a function of retention time. A mixed solvent of H<sub>2</sub>O (eluent A)/acetonitrile (eluent B) was used with a linear gradient elution profile: 0 min, 90% A; 7 min, 0% A; 13 min, 0% A was used as the mobile phase. The column temperature was maintained at 25 °C and the flow rate of the mobile phase was 0.7 mL/min.

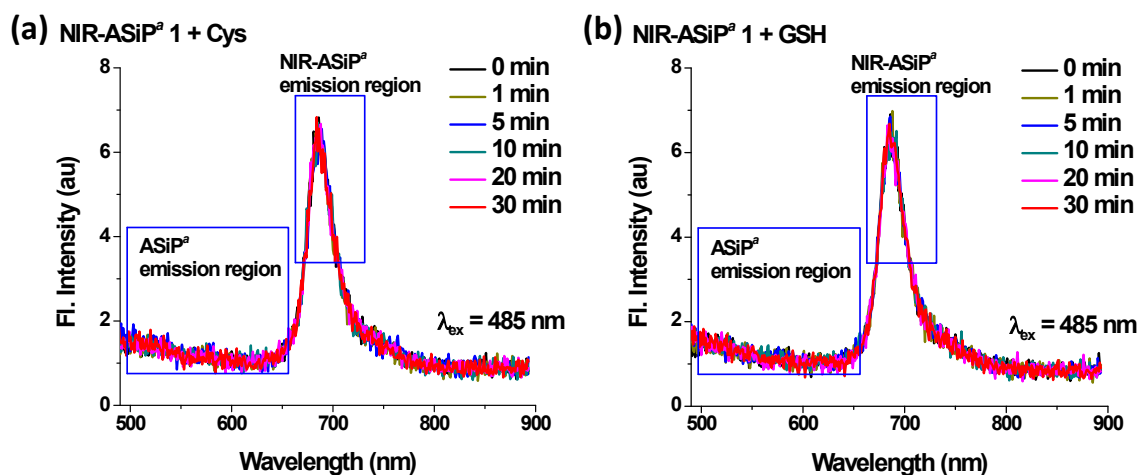

**Fig. S5** Time dependent (up to 30 min) fluorescence spectral changes of NIR-ASiP<sup>a</sup> **1** (10  $\mu\text{M}$ ) upon addition of (a) Cys (250  $\mu\text{M}$ ) and (b) GSH (10 mM) in PBS containing 1% DMSO. The emissions were collected upon excitations at shorter wavelength of 485 nm, to observe any emissions in the short wavelength region. The fluorescence spectral studies show that NIR-ASiP<sup>a</sup> **1** containing less electron-withdrawing carbamate moiety at the C-10 amine does not react with biothiols (Cys or GSH) in only PBS buffer, as there appear no appreciable signals in the shorter wavelength (around 600 nm) region, except the desired NIR emission region.

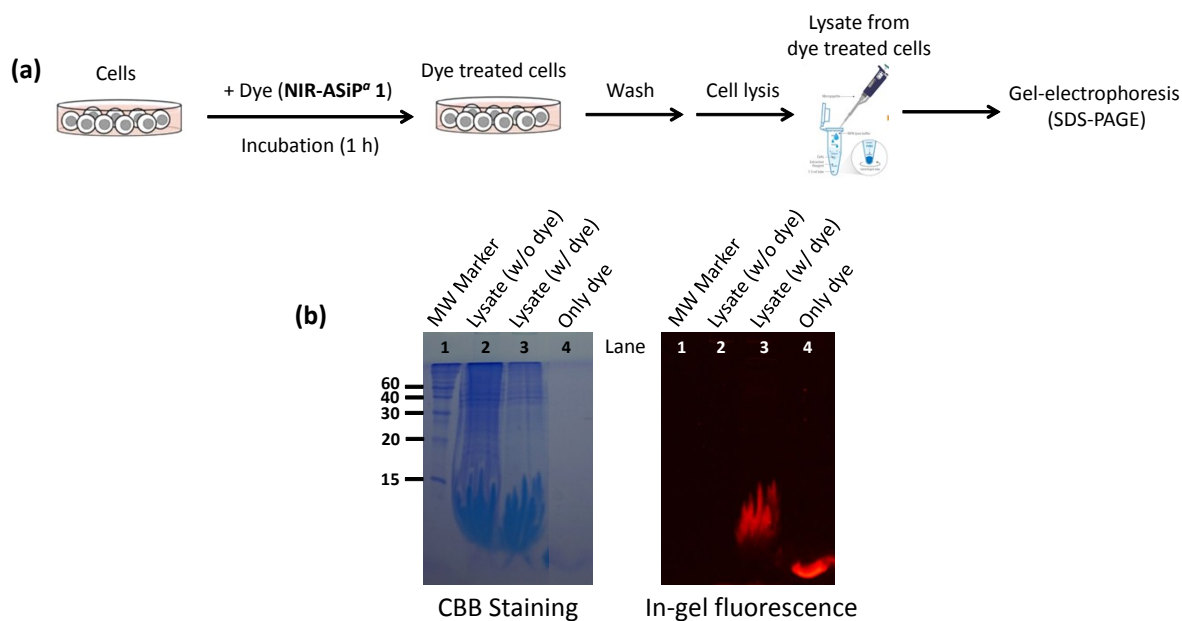

**Fig. S6** Gel-electrophoresis analysis of cell lysate. (a) A549 cells were incubated with NIR-ASiP<sup>a</sup> 1 dye (10  $\mu$ M) for 1 h, washed with PBS buffer, and lysed with RIPA (RadioImmunoPrecipitation Assay) lysis buffer; the lysate was used for the gel-electrophoresis analysis. (b) Coomassie Brilliant Blue (CBB) staining and in-gel fluorescence imaging of the SDS-PAGE gel after electrophoresis analysis (18% PAA, 120 V, 90 min) show that the dye-treated cell lysate provides strong fluorescence due to labeling of cellular proteins. Lane 1: molecular weight marker (in kDa). Lane 2: lysate of cells without dye treatment. Lane 3: lysate of dye treated cells. Lane 4: only dye (1.0  $\mu$ M).

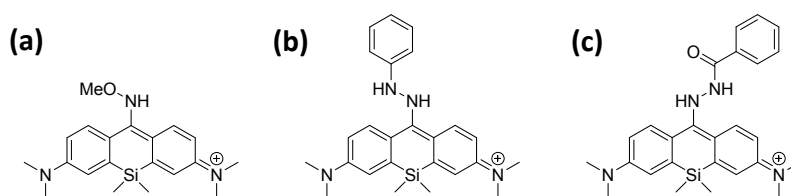

All these three ASiP<sup>a</sup> derivatives have a tendency to exist in the nonfluorescent form.

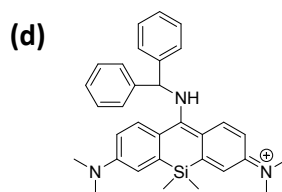

Steric hindrance at the amine site limits further substitution with electron withdrawing groups

**Fig. S7** (a–c) The structures of the ASiP<sup>a</sup> analogues containing different amine substituents (methoxyamine, phenylhydrazine and benzhydrazide). (d) The structure of the ASiP<sup>a</sup> analogue containing sterically hindered benzhydrylamine substituent.

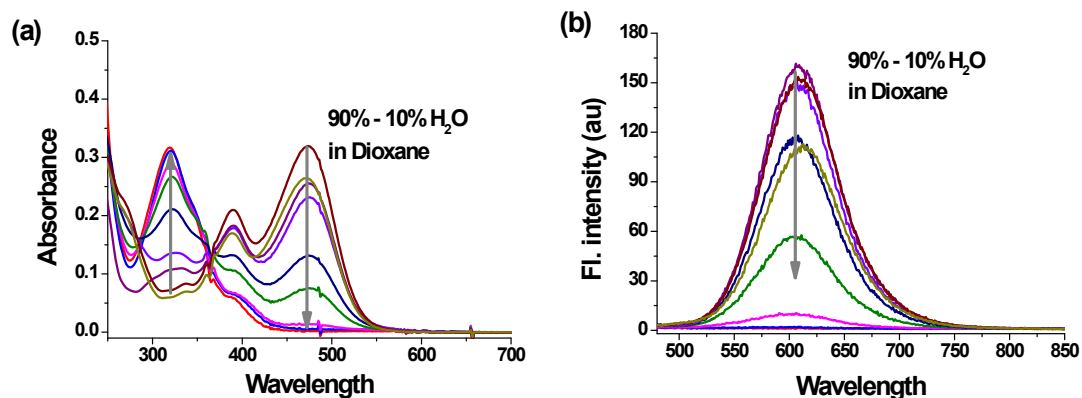

**Fig. S8** (a) Absorption and (b) emission spectral changes of tetramethylamino analogue ASiP<sup>a</sup> **2** (10  $\mu$ M) in a mixture of water–dioxane with varying water content (90–10%). In accordance with the increasing dioxane content (thus, decreasing solvent polarity), the corresponding absorption spectra show a gradual decrease of absorbance at 472 nm (corresponding to fluorescent enamine form) and an increase at 320 nm (corresponding to non-fluorescent imine form); whereas the corresponding emission intensity gradually decreases with decreasing solvent polarity.

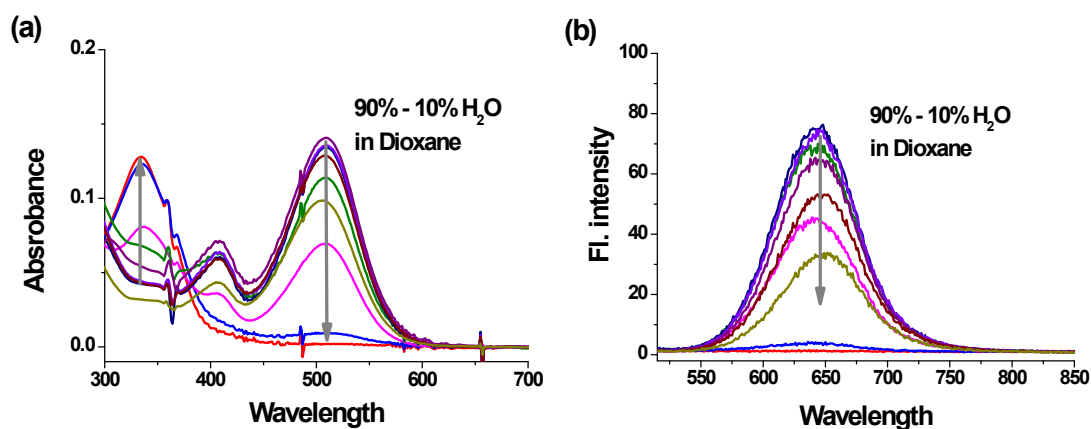

**Fig. S9** (a) Absorption and (b) emission changes of julolidine derived ASiP<sup>j</sup> **2** (10  $\mu$ M) in a mixture of water–dioxane with varying water content (90–10%). In accordance with the increasing dioxane content (thus, decreasing solvent polarity), the corresponding absorption spectra show a gradual decrease of absorbance at 507 nm (corresponding to the fluorescent enamine form) and an increase at 335 nm (corresponding to the non-fluorescent imine form); whereas the corresponding emission intensity gradually decreases with decreasing solvent polarity.

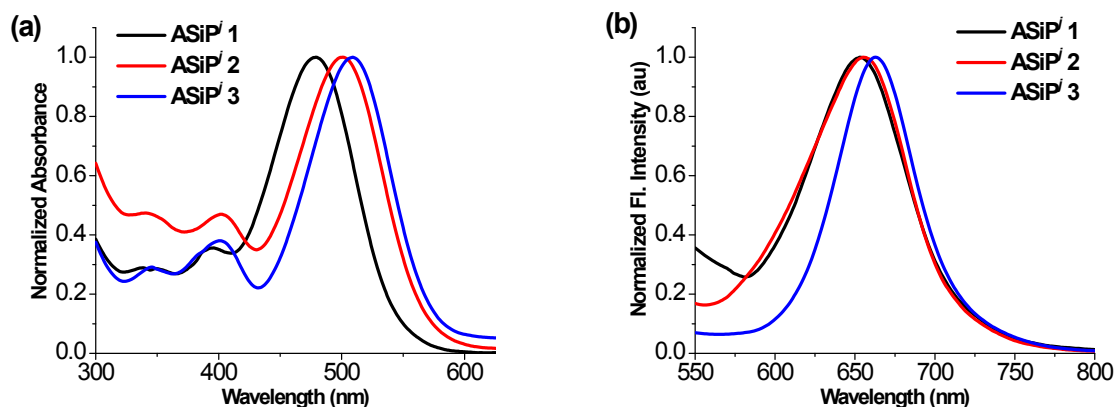

**Fig. S10** Normalized (a) absorption and (b) emission spectra of ASiP' 1 (black line), ASiP' 2 (red line) and ASiP' 3 (blue line) in *PBS buffer (pH 7.4)* containing 1% DMSO, with dye concentration at 1.0  $\mu\text{M}$ . The emission spectra were collected by excitation at the corresponding maximum absorbance wavelength for each dye.

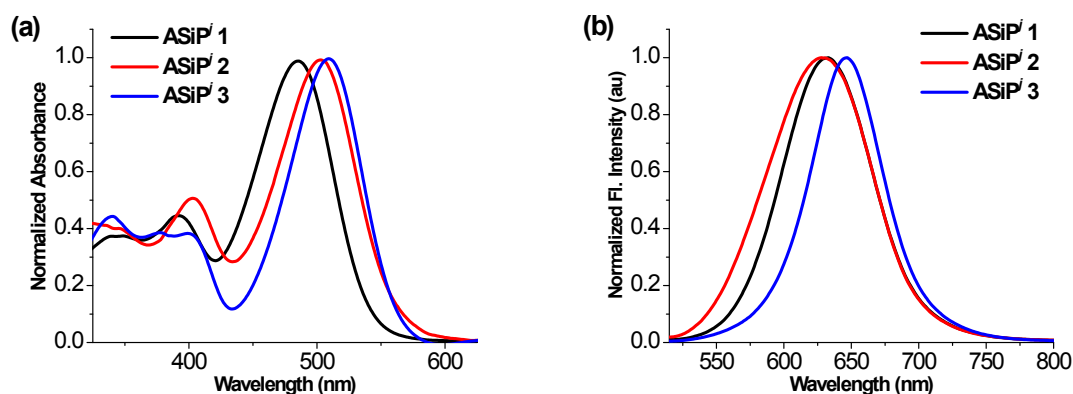

**Fig. S11** Normalized (a) absorption and (b) emission spectra of ASiP' 1 (black line), ASiP' 2 (red line) and ASiP' 3 (blue line) in *ethanol (EtOH)*, obtained for each dye at 10  $\mu\text{M}$  concentration. The emission spectra were collected by excitation at the corresponding maximum absorbance wavelength for each dye.

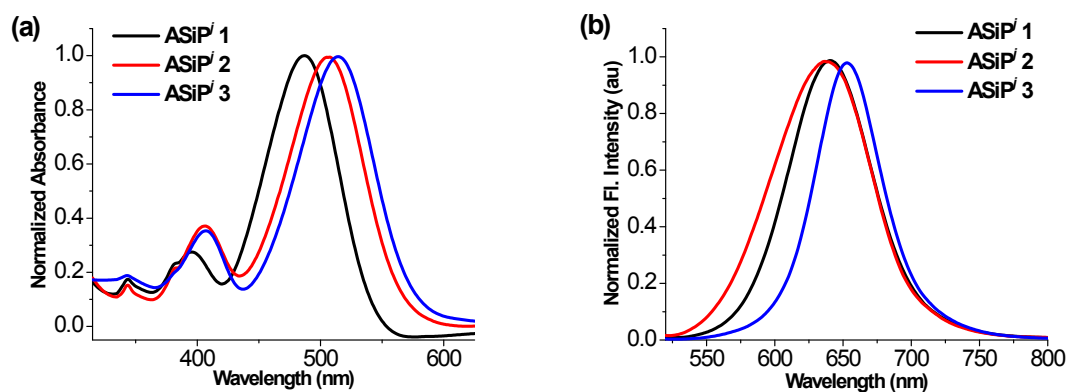

**Fig. S12** Normalized (a) absorption and (b) emission spectra of ASiP' 1 (black line), ASiP' 2 (red line) and ASiP' 3 (blue line) in *acetonitrile ( $\text{CH}_3\text{CN}$ )*, obtained for each dye at 10  $\mu\text{M}$  concentration. The



emission spectra were collected by excitation at the corresponding maximum absorbance wavelength for each dye.

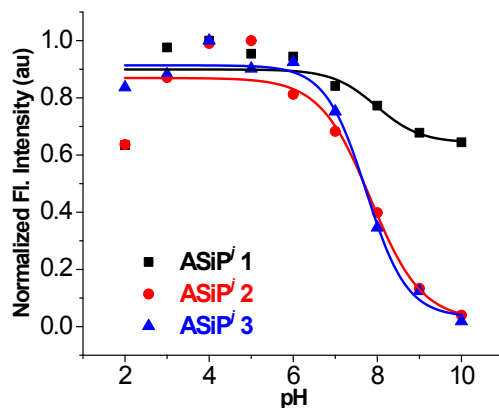

**Fig. S13** pH-Dependent fluorescence intensity changes of ASiP' 1 (black line), ASiP' 2 (red line) and ASiP' 3 (blue line). The emission spectra were monitored at the corresponding maximum emission wavelength by excitation at the corresponding maximum absorbance wavelength for each dye (10  $\mu$ M).

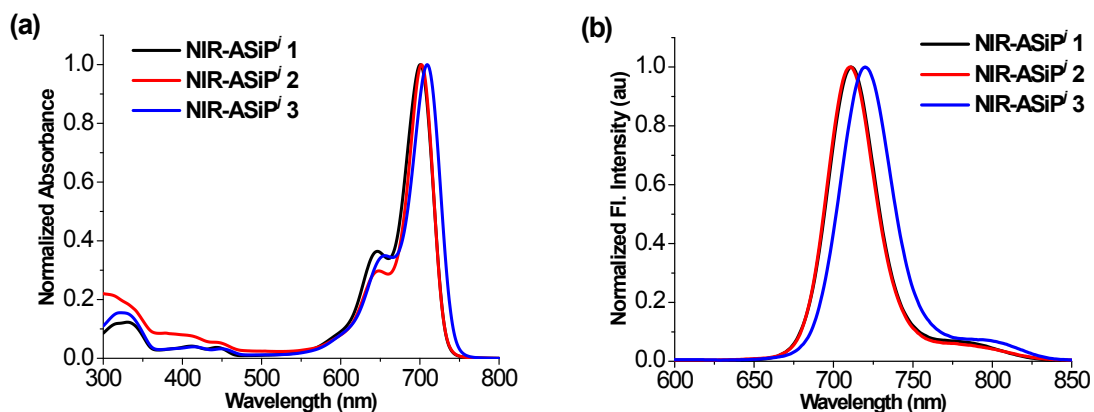

**Fig. S14** Normalized (a) absorption and (b) emission spectra of NIR-ASiP' 1 (black line), NIR-ASiP' 2 (red line) and NIR-ASiP' 3 (blue line) in *PBS buffer (pH 7.4)* with 1% DMSO, obtained for each dye at 10  $\mu$ M concentration. The emission spectra were collected by excitation at the corresponding maximum absorbance wavelength for each dye.

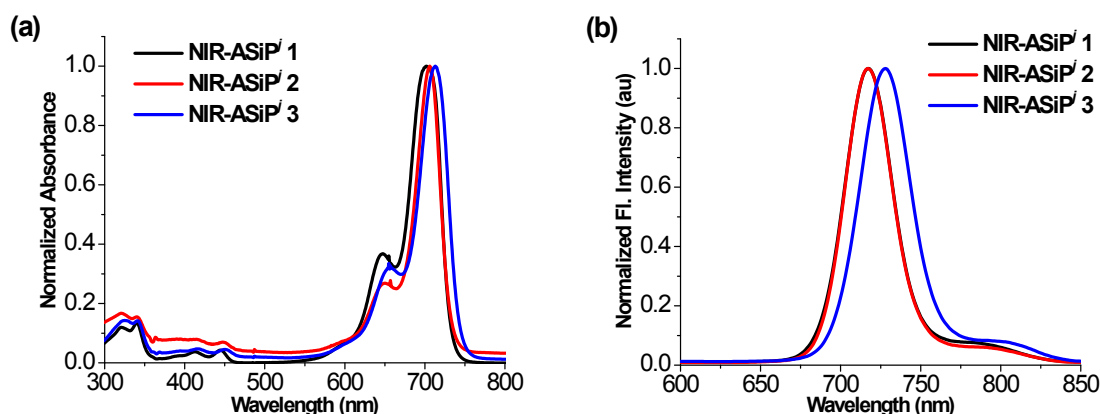

**Fig. S15** Normalized (a) absorption and (b) emission spectra of NIR-ASiP<sup>j</sup> 1 (black line), NIR-ASiP<sup>j</sup> 2 (red line) and NIR-ASiP<sup>j</sup> 3 (blue line) in *ethanol* (*EtOH*), obtained with each dye at 10  $\mu$ M concentration. The emission spectra were collected by excitation at the corresponding maximum absorbance wavelength for each dye.

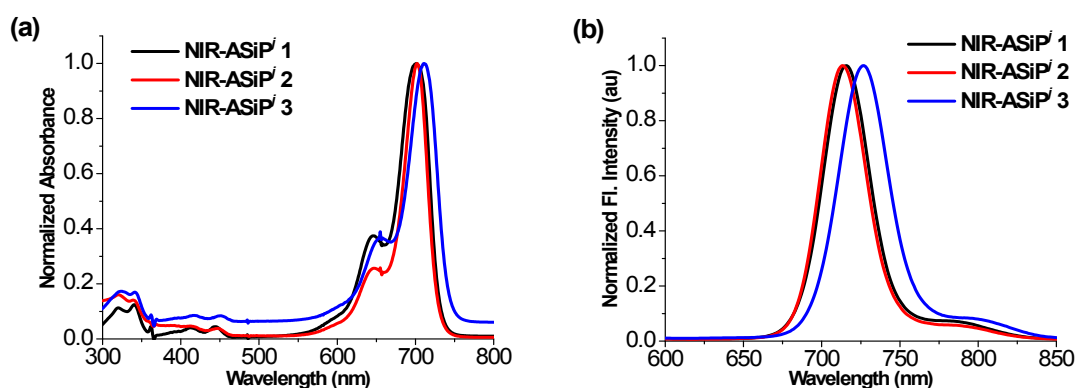

**Fig. S16** Normalized (a) absorption and (b) emission spectra of NIR-ASiP<sup>j</sup> 1 (black line), NIR-ASiP<sup>j</sup> 2 (red line) and NIR-ASiP<sup>j</sup> 3 (blue line) in *acetonitrile* ( $CH_3CN$ ), obtained for each dye at 10  $\mu$ M concentration. The emission spectra were collected by excitation at the corresponding maximum absorbance wavelength for each dye.

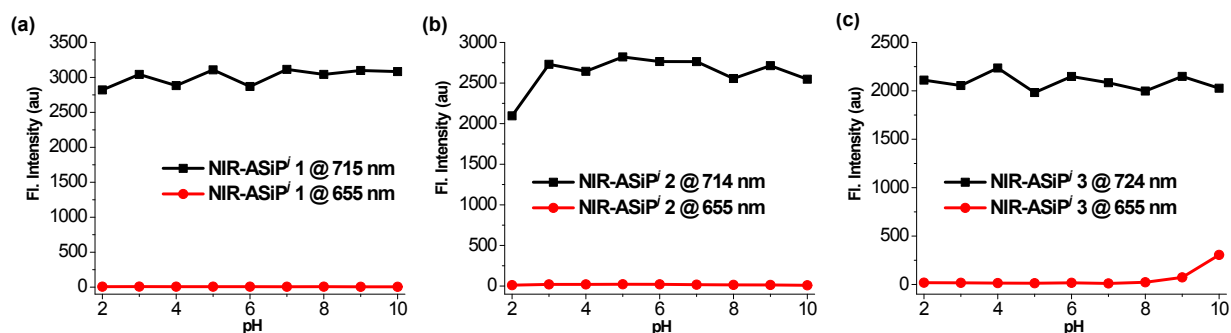

**Fig. S17** pH-Dependent fluorescence intensity changes of (a) NIR-ASiP<sup>j</sup> 1, (b) NIR-ASiP<sup>j</sup> 2 and (c) NIR-ASiP<sup>j</sup> 3. The corresponding emission spectrum of each dye (10  $\mu$ M) was monitored at two

wavelengths—NIR emission (black lines; upon excitation at the corresponding maximum absorbance wavelength for each dye) and red emission wavelengths (red lines; upon excitation at 480 nm). The strong electron-withdrawing trifluoroacetamide containing NIR-ASiP<sup>j</sup> **3** shows a little interference only at the highly basic medium (pH = 9–10) when observed in the red emission wavelength.

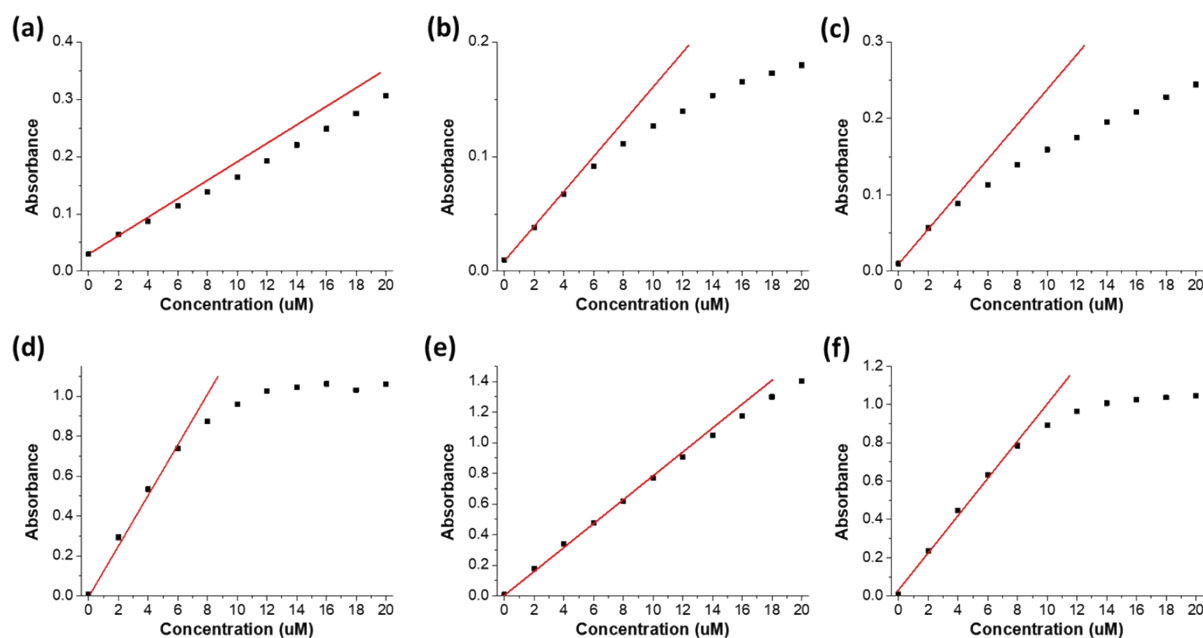

**Fig. S18** Evaluation of aggregation behaviour of the dyes. Maximum absorbance values of (a) ASiP<sup>j</sup> **1**, (b) ASiP<sup>j</sup> **2**, (c) ASiP<sup>j</sup> **3**, (d) NIR-ASiP<sup>j</sup> **1**, (e) NIR-ASiP<sup>j</sup> **2**, and (f) NIR-ASiP<sup>j</sup> **3**, plotted against different concentrations (0–20  $\mu\text{M}$ ) in PBS buffer (pH 7.4) at 25  $^{\circ}\text{C}$ . The data show that the ASiP<sup>j</sup> and NIR-ASiP<sup>j</sup> dyes show slight aggregation tendency at or above 10  $\mu\text{M}$  in in PBS (pH 7.4) at 25  $^{\circ}\text{C}$ . For cellular imaging, however, use of 10  $\mu\text{M}$  of the dyes would cause little aggregation because of the higher temperature of incubation (36  $^{\circ}\text{C}$ ) and the less hydrophilic nature of the cellular environment compared to that of PBS.

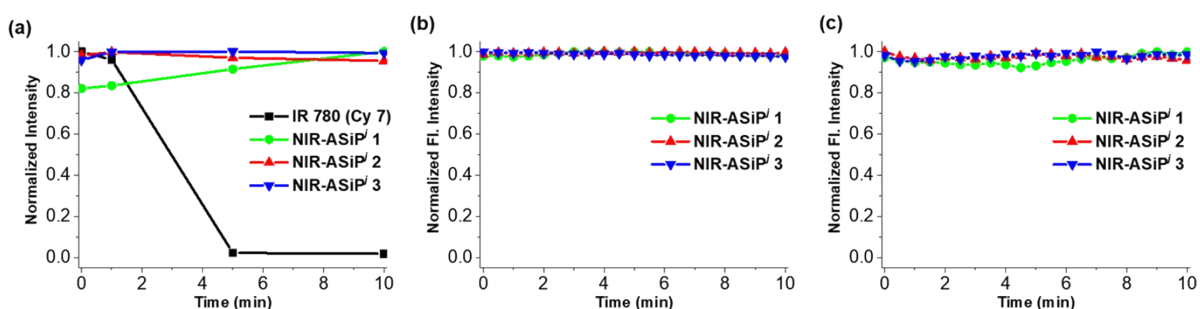

**Fig. S19** Normalized time-dependent fluorescence intensity changes of NIR-ASiP<sup>j</sup> **1–3** and a cyanine dye (Cy 7; IR 780) in pH 7.4 PBS buffer (containing 1% DMSO), observed by continuously irradiating at (a) 254 nm (300  $\mu\text{W}/\text{cm}^2$ ), (b) 633 nm (22  $\mu\text{W}/\text{cm}^2$ ), usual CLSM imaging conditions, (c) 900 nm (145  $\text{mW}/\text{cm}^2$ ), harsh two-photon imaging conditions for 10 min at 10  $\mu\text{M}$  dye concentration..

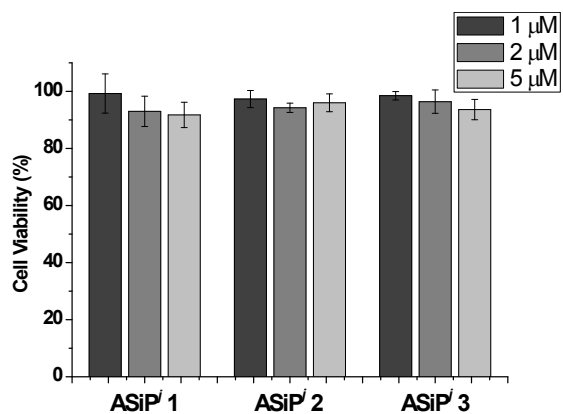

**Fig. S20** Viability of HeLa cells incubated with ASiP<sup>j</sup> 1–3 at various concentrations (1.0, 2.0, and 5.0 μM) for 24 h at 37 °C. The cell viability was assessed by measuring their ability to metabolize CCK-8 (Cell Counting Kit-8) in HeLa cell line.

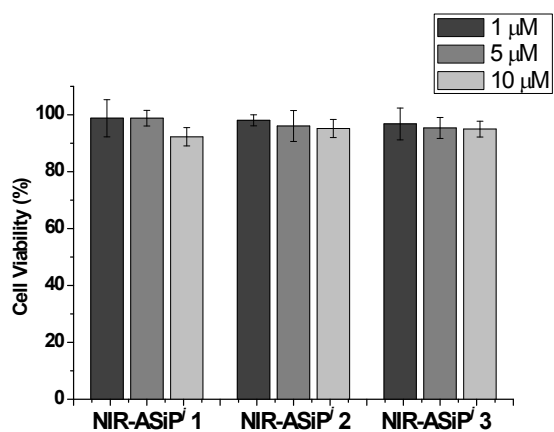

**Fig. S21** Viability of HeLa cells incubated with NIR-ASiP<sup>j</sup> 1–3 at various concentrations (1.0, 5.0, and 10 μM) for 24 h at 37 °C. The cell viability was assessed by measuring their ability to metabolize CCK-8 (Cell Counting Kit-8) in HeLa cell line.

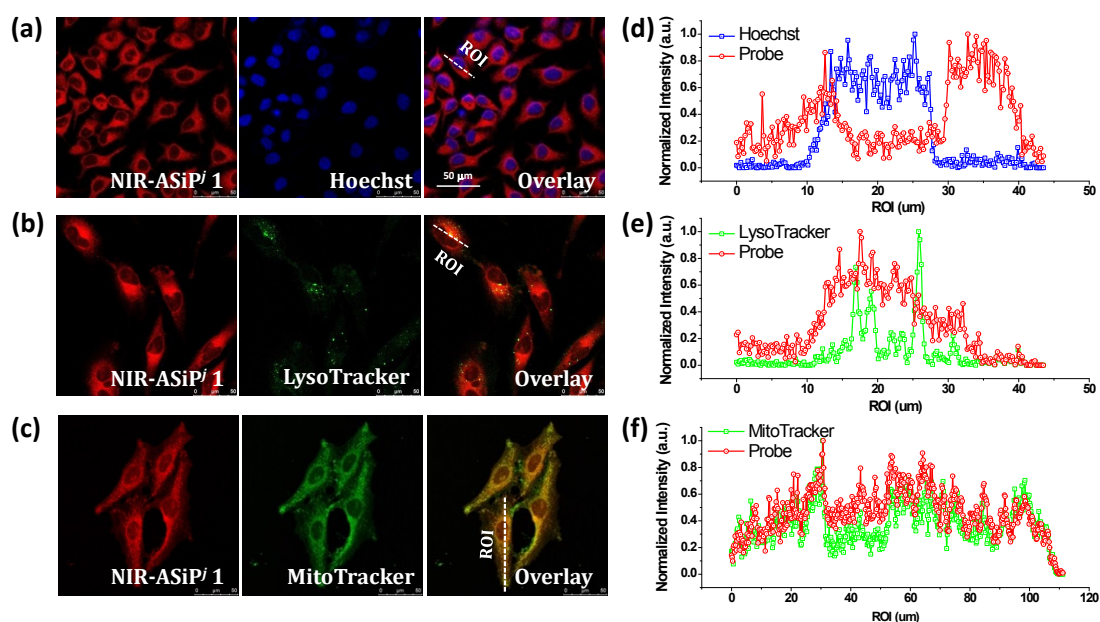

**Fig. S22** Confocal microscopic images of cells co-incubated with NIR-ASiPj 1 (5.0 μM) and (a) Hoechst (10 mg/mL), (b) LysoTracker Green (200 nM), and (c) MitoTracker Green (1.0 μM), respectively, for 20 min at 37 °C. The images were collected in various emission channels corresponding to Hoechst ( $\lambda_{em} = 415\text{--}500$  nm;  $\lambda_{ex} = 405$  nm), LysoTracker Green ( $\lambda_{em} = 500\text{--}550$  nm;  $\lambda_{ex} = 488$  nm), MitoTracker Green ( $\lambda_{em} = 500\text{--}550$  nm;  $\lambda_{ex} = 488$  nm) and NIR-ASiPj 1 ( $\lambda_{em} = 650\text{--}700$  nm;  $\lambda_{ex} = 633$  nm). (d,e,f) The corresponding intensity profiles measured across the region of interest (ROI) in the respective overlay images. The corresponding Pearson's correlation co-efficient (PCC) values were calculated as follows: Hoechst/NIR-ASiPj 1 =  $-0.30$ ; LysoTracker/NIR-ASiPj 1 =  $0.54$ ; MitoTracker/NIR-ASiPj 1 =  $0.73$ .

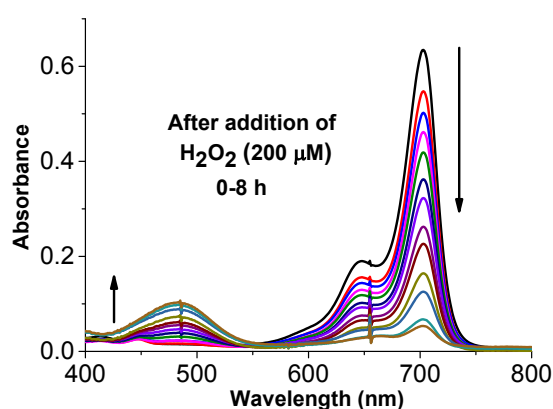

**Fig. S23** Time dependent (0–8 h) absorption changes of ASiPj-H<sub>2</sub>O<sub>2</sub> in the presence of H<sub>2</sub>O<sub>2</sub> (200 μM), showing a gradual decrease of absorbance at 702 nm and a gradual increase of absorbance at 481 nm. The spectra were recorded after mixing at 25 °C in PBS buffer (pH = 7.4) containing 1% DMSO.

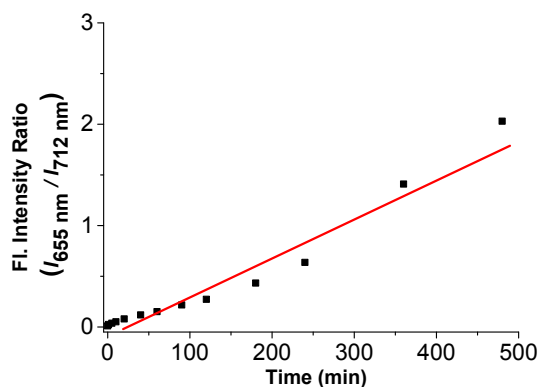

**Fig. S24** Time dependent (0–8 h) emission intensity ratio ( $I_{655 \text{ nm}}/I_{712 \text{ nm}}$ ) changes of **ASiP<sup>j</sup>-H<sub>2</sub>O<sub>2</sub>** in presence of H<sub>2</sub>O<sub>2</sub> (200  $\mu\text{M}$ ). The spectra were recorded after mixing at 25 °C in PBS buffer (pH = 7.4) containing 1% DMSO.

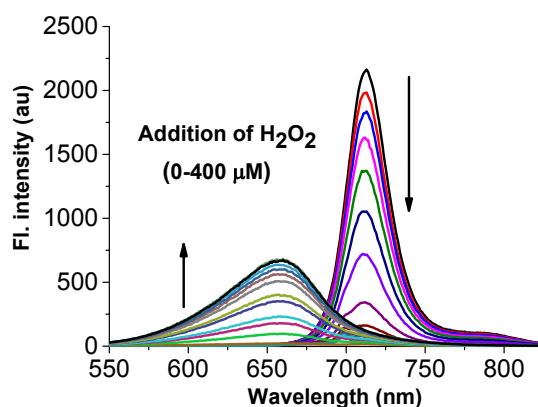

**Fig. S25** The fluorescence changes of **ASiP<sup>j</sup>-H<sub>2</sub>O<sub>2</sub>** (10  $\mu\text{M}$ ) with increasing concentrations of H<sub>2</sub>O<sub>2</sub> (0–400  $\mu\text{M}$ ), showing a gradual decrease of NIR intensity with maxima at 712 nm (under excitation at 702 nm) and a gradual increase of far-red intensity with maxima at 655 nm (under excitation at 481 nm). The spectra were recorded after mixing at 25 °C for 3 h in PBS buffer (pH = 7.4) containing 1% DMSO.

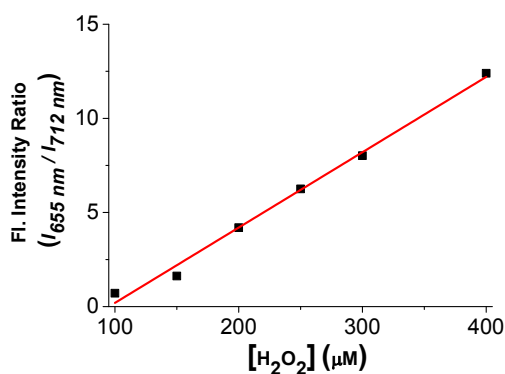

**Fig. S26** The emission intensity ratio ( $I_{655 \text{ nm}}/I_{712 \text{ nm}}$ ) changes of **ASiP<sup>j</sup>-H<sub>2</sub>O<sub>2</sub>** (10  $\mu\text{M}$ ) depending on  $[\text{H}_2\text{O}_2]$  in the higher concentration region (100–400  $\mu\text{M}$ ) in PBS (pH 7.4) containing 1% DMSO. The spectra were recorded after mixing at 25 °C for 3 h, under excitation at 481 nm and 702 nm, respectively.

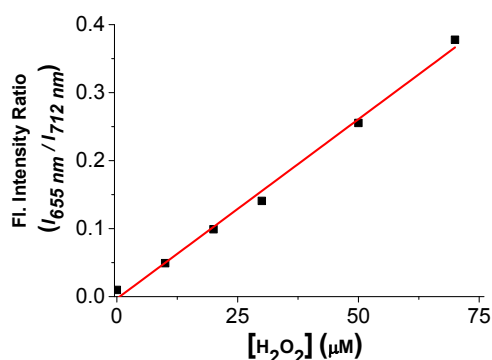

**Fig. S27** The emission intensity ratio ( $I_{655 \text{ nm}}/I_{712 \text{ nm}}$ ) changes of **ASiP<sup>j</sup>-H<sub>2</sub>O<sub>2</sub>** (10 μM) depending on [H<sub>2</sub>O<sub>2</sub>] at the low concentration region (0–75 μM) in PBS (pH 7.4) containing 1% DMSO. The spectra were recorded after mixing at 25 °C for 3 h, under excitation at 481 nm and 702 nm, respectively. On the basis of this plot, the detection limit (LOD) was calculated to be 9.0 nM by the equation:  $\text{LOD} = 3\sigma/k$ ,

Where  $\sigma$  is the standard deviation of three blank measurements =  $2.93 \times 10^{-4}$ ,  $k$  is the slope of the linear plot of the fluorescence intensity ratios changes ( $I_{655 \text{ nm}}/I_{712 \text{ nm}}$ ) in the lower H<sub>2</sub>O<sub>2</sub> concentration region (0–75 μM) =  $9.85 \times 10^{-2}$ .

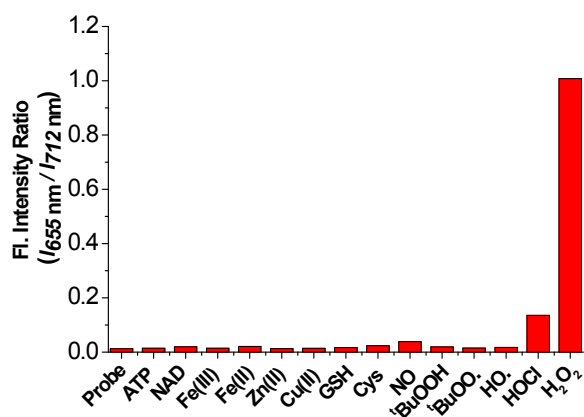

**Fig. S28** The ratiometric fluorescence response ( $I_{655 \text{ nm}}/I_{712 \text{ nm}}$ ) of **ASiP<sup>j</sup>-H<sub>2</sub>O<sub>2</sub>** (10 μM) in the presence of H<sub>2</sub>O<sub>2</sub> (100 μM) and various biologically relevant analytes (ATP, NAD, Fe(III), Fe(II), Zn(II) and Cu(II), each at 50 μM), biothiols (GSH at 1 mM and Cys at 200 μM), reactive oxygen species (such as nitric oxide (NO•), *t*-butyl hydroperoxide (*t*BuOOH), *t*-butyl peroxide radical (*t*BuOO•), hydroxyl radical (HO•) and hypochlorous acid (HOCl), each at 100 μM). The spectra were recorded in PBS buffer (pH 7.4) containing 1% DMSO after incubation at 25 °C for 3 h, under excitation at 481 nm (for 655 nm emission) and at 702 nm (for 712 nm emission), respectively.

## Experimental procedures

### One-photon optical property measurement

Absorption spectra were measured using a HP Agilent 8453 spectrophotometer. Fluorescence spectra were recorded on a Photon Technical International Fluorescence system using a 1.0 mL quartz cuvette (10 mm light path). The excitation and emission wavelength band paths were both set at 2 nm. Stock solutions of each dye were prepared in DMSO (1 mM) and it was added to the various solvents by keeping the concentration of DMSO within 1% of the total volume for measurement of photophysical properties of the dyes. Final titrant volume is the same (1.0 mL) for all the measurements. MilliQ water was used to prepare all aqueous solutions. All measurement were performed at 25 °C. All pH measurements were made with a Thermo scientific, Orion 2 star pH benchtop.

### **Fluorescence assays with NIR-ASiP<sup>j</sup> based ratiometric H<sub>2</sub>O<sub>2</sub> probe, ASiP<sup>j</sup>-H<sub>2</sub>O<sub>2</sub>**

All of the solvents used were of analytical grade. A stock solution of H<sub>2</sub>O<sub>2</sub> (10 mM) was prepared by addition of commercially available H<sub>2</sub>O<sub>2</sub> (30 % (w/w) in H<sub>2</sub>O in DI water. The concentration of H<sub>2</sub>O<sub>2</sub> was determined from the absorption at 240 nm ( $\epsilon = 43.6 \text{ M}^{-1} \text{ cm}^{-1}$ ). Solutions of other biologically relevant analytes were prepared by dissolving each of the corresponding reagents in distilled water. A stock solution of probe was prepared in DMSO at a concentration of 1.0 mM. For spectroscopic measurement, the probe stock solution was diluted to 10  $\mu\text{M}$  in 10 mM PBS buffer solutions of pH 7.4, which was treated with an analyte solution and then kept at 25 °C. After specified time, a required amount of the mixed solution was transferred to a cuvette (1.0 mL) for spectroscopic measurement. One-photon fluorescence spectra were recorded on a Photon Technical International Fluorescence system using a 1.0 mL quartz cuvette (10 mm light path).

### **Quantum yield measurement**

Fluorescence quantum yields for the synthesized dyes were determined using Rhodamine 101 ( $\Phi_F = 0.915$  in ethanol), fluorescein ( $\Phi = 0.95$  in 0.1 M NaOH) or Nile blue ( $\Phi = 0.27$  in ethanol) as the reference dye. The quantum yield was calculated using the following equation:

$$\Phi_{F(x)} = \Phi_{F(s)} (A_s F_x / A_x F_s) (n_x / n_s)^2$$

Where  $\Phi_F$  is the fluorescence quantum yield,  $A$  is the absorbance at the excitation wavelength,  $F$  is the area under the corrected emission curve, and  $n$  is the refractive index of the solvents used. Subscripts  $s$  and  $x$  refer to the standard and to the unknown, respectively.



## Two-photon property measurement

Two-photon absorption cross-section (TPACS) values were measured by following the known method.<sup>1</sup> Two equations are referred from the references as below.

$$\frac{\langle F(t) \rangle_{\text{cal}}}{\langle F(t) \rangle_{\text{new}}} = \frac{\Phi_{\text{cal}} \eta_{2\text{cal}} \sigma_{2\text{cal}} C_{\text{cal}} \langle P_{\text{cal}}(t) \rangle^2 n_{\text{cal}}}{\Phi_{\text{new}} \eta_{2\text{new}} \sigma_{2\text{new}} C_{\text{new}} \langle P_{\text{new}}(t) \rangle^2 n_{\text{new}}}, \quad (4)$$

The equation (4) is the main equation that calculates TPACS using a reference dye and equation (5) could be extracted from equation (4).

$$\sigma_{2\text{new}}(\lambda) \eta_{2\text{new}} = \frac{\Phi_{\text{cal}} \eta_{2\text{cal}} \sigma_{2\text{cal}}(\lambda) C_{\text{cal}} \langle P_{\text{cal}}(t) \rangle^2 \langle F(t) \rangle_{\text{new}} n_{\text{cal}}}{\Phi_{\text{new}} C_{\text{new}} \langle P_{\text{new}}(t) \rangle^2 \langle F(t) \rangle_{\text{cal}} n_{\text{new}}}. \quad (5)$$

( $\sigma_2$  = two-photon absorption cross section;  $\eta$  = quantum efficiency;  $\sigma_{\text{TPE}}$  (Two-photon section cross section =  $\sigma\eta$ ;  $\langle F(t) \rangle$  = time averaged fluorescence emission;  $C$  = fluorophore concentration;  $\langle P(t) \rangle$  = time averaged laser power;  $n$  = reflective index of sample;  $\Phi$  = fluorescence collection efficiency).

$\Phi_{\text{cal}}$  and  $\Phi_{\text{new}}$  are the identical value in the same experimental setup, and  $\langle P_{\text{cal}}(t) \rangle$ ,  $\langle P_{\text{new}}(t) \rangle$  are also identical when the same laser has been applied. TPACS values of samples could be calculated by adding values of known TPACS (Two-Photon Action Cross Section) ( $\sigma\eta$ ), concentration ( $C$ ), detected emission ( $\langle F(t) \rangle$ ), and known reflective index ( $n$ ).

Rhodamine B in methanol (1.0  $\mu\text{M}$  or 10  $\mu\text{M}$ ) was used as a reference, and 10  $\mu\text{M}$  of ASiP<sup>*i*</sup> dyes in acetonitrile were used for the measurement. Each reflective index of a given solvent was applied (assuming that the reflective index of sample is almost the same as that of pure solvent). 100  $\mu\text{L}$  of each sample was loaded in a well slide and covered with a cover glass. The edge of cover glass was coated with transparent manicure to prevent the evaporation of solvent and then mounted on a vibration isolation table. Two-photon excitation was performed with a Ti-sapphire laser (Chameleon Vision II, Coherent) at 140 fs pulse width and 80 MHz pulse repetition rate. The emission intensity was collected through an HCX APO 10 $\times$  objective lens (Leica, Germany) of a two-photon microscopy (TCS SP5 II, Leica, Germany) equipped with HyD detector (Leica, Germany), in the range of 400–665 nm.

## Preparation of cell samples and their confocal microscopic imaging

HeLa and A549 human cancer cells were obtained from Korean Cell Line Bank. The cells were incubated in DMEM supplemented with 10% (v/v) fetal bovine serum (FBS) and 1% (v/v) penicillin-streptomycin (PS) at 37 °C in a humidified atmosphere of 5% of CO<sub>2</sub> in the air. Cells were passaged when they reached approximately 80% confluence. Cells were seeded onto a cell culture dish at a density of  $1.0 \times 10^5$  cells, which was incubated at 37 °C overnight under 5% CO<sub>2</sub> in the air. For imaging experiments with the dyes, cells were incubated with the corresponding dye (1.0  $\mu\text{M}$  or 10  $\mu\text{M}$ ) in DMEM containing for 30 min and washed with PBS (phosphate buffered saline) three times to remove the remaining dye. For imaging experiments with the H<sub>2</sub>O<sub>2</sub> probe, the cells were incubated in DMEM

containing the probe (10  $\mu$ M) for 30 min, washed with PBS three times to remove the remaining probe. In the positive control experiment with an exogenous H<sub>2</sub>O<sub>2</sub> source, the cells were incubated in DMEM containing the probe (10  $\mu$ M) for 30 min and washed with PBS (phosphate buffered saline) three times to remove the remaining probe and then incubated further with H<sub>2</sub>O<sub>2</sub> (50 or 200  $\mu$ M) for further 30 min. Fluorescent cellular images were recorded by confocal microscopy, using Leica TCS SP5 II Advanced System equipped with multiple visible laser lines (405, 458, 476, 488, 496, 514, 561, 594, and 633 nm) and a 40 $\times$  objective lens (obj. HCX PL APO 40 $\times$ / 1.10 W CORR CS, Leica, Germany). Acquired images were processed using LAS AF Lite (Leica, Germany).

### **Two-photon microscopic imaging of cells**

The above mentioned stained cell samples were placed on a slide glass flatway. Fluorescence images of the cells were recorded by two-photon microscopy (TPM). TPM imaging was performed using a Ti-Sapphire laser (Chameleon Vision II, Coherent) at 140 fs pulse width and 80 MHz pulse repetition rate (TCS SP5 II, Leica, Germany) and a 20 $\times$  objective lens (obj. HCX PL APO 20 $\times$ / 1.10 W CORR CS, Leica, Germany). The two-photon excitation wavelength was tuned to 900 nm. Each emission light was spectrally resolved into multi-channels as mentioned for each image. The excitation laser power was approximately 9.3 mW. The images were consisted of 1024 $\times$ 1024 pixels, and the scanning speed was maintained as 100 MHz during the entire imaging.

### **Cell viability assay**

Cell viability was assessed by measuring their ability to metabolize CCK-8 (Cell Counting Kit-8) in HeLa cell line.<sup>2</sup> Cells were seeded onto 96-well plates at a density of about  $5 \times 10^3$  cells per well in the growth medium and incubated until about 70–80% confluency. Following the probe treatment at various concentrations as indicated, 10  $\mu$ L of the CCK-8 solution (from Dojindo Molecular Technologies, Inc.) was added to each well and cells were maintained for 1 h at 37  $^{\circ}$ C. After being incubated for 24 h at 37  $^{\circ}$ C, absorbance at 450 nm was measured.

### **Synthetic procedures of the dyes**

**General methods.** The chemical reagents were purchased from Sigma-Aldrich or Alfa-Aesar and used as received. All solvents were purified and dried by standard methods prior to use. Deionized water was used to prepare all aqueous solutions. All reactions were performed under argon atmosphere unless otherwise mentioned. Analytical TLC was performed on Merck silica gel (60 F<sub>254</sub>) plates (0.25 mm) and visualized with UV light. Preparative HPLC was performed with column: Zorbax XBD-C18, 5  $\mu$ m, 21.2  $\times$  150 mm; solvent A: acetonitrile + 0.1% v/v TFA, solvent B: H<sub>2</sub>O + 0.1% v/v TFA; solvent gradient 30/70–100/0 A:B over 40 min, flow rate = 20 mL/min; temperature 25  $^{\circ}$ C; detection at 254 nm. <sup>1</sup>H and <sup>13</sup>C NMR spectra were measured with a Bruker DPX-300 spectrometer. Coupling constants

(*J* value) are reported in Hertz. The chemical shifts ( $\delta$ ) are shown in ppm, multiplicities are indicated by s (singlet), d (doublet), t (triplet) and m (multiplet). All chemical shifts are reported in the standard notation of parts per million (ppm) using residual solvent protons as the internal standard. Spectra are referenced to residual chloroform (7.26 ppm,  $^1\text{H}$ ; 77.23 ppm,  $^{13}\text{C}$ ) or  $\text{CD}_3\text{OD}$  (3.31 ppm,  $^1\text{H}$ ; 49.17 ppm,  $^{13}\text{C}$ ). Mass spectroscopic data were obtained from the Korea Basic Science Institute (Daegu) using a JEOL JMS 700 high resolution mass spectrometer.

### Scheme S1. Synthetic scheme of ASiP<sup>a</sup> 1–9 and 11.

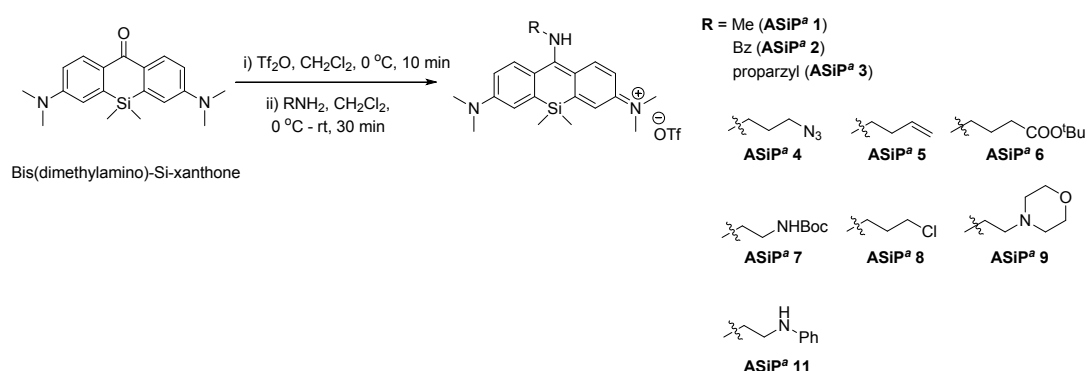

### Synthesis of ASiP<sup>a</sup> 1–9 and 11.

Trifluoromethanesulfonic anhydride (39  $\mu\text{L}$ , 0.231 mmol) was added drop-wise to a solution of bis(dimethylamino)-Si-xanthone (prepared according to the reported procedure<sup>3</sup>: 50 mg, 0.154 mmol) in anhydrous  $\text{CH}_2\text{Cl}_2$  (5 mL) at 0  $^\circ\text{C}$ . The resulting intense blue reaction mixture was stirred at 0  $^\circ\text{C}$  for 10 min and then each of various amines (3 equiv.) was added at the same temperature. The reaction mixture was further stirred for 30 min at room temperature, and then directly loaded onto silica gel for flash chromatography (eluent:  $\text{MeOH}/\text{CH}_2\text{Cl}_2 = 5/95$ ) to afford the pure ASiP<sup>a</sup> dyes as orange coloured solids.

**ASiP<sup>a</sup> 1:** A solution of methylamine in THF (2.0 M, 231  $\mu\text{L}$ , 0.462 mmol) was used as the amine source. Yield = 41 mg (78%).  $^1\text{H}$  NMR ( $\text{CDCl}_3$ , 500 Hz, 298 K)  $\delta$  8.00 (d,  $J = 9.0$  Hz, 1H), 7.60 (d,  $J = 9.0$  Hz, 1H), 6.94 (d,  $J = 2.5$  Hz, 1H), 6.84–6.75 (m, 2H), 3.62 (s, 3H), 3.14 (s, 6H), 3.08 (s, 6H), 0.48 (s, 6H);  $^{13}\text{C}$  NMR (125 MHz,  $\text{CDCl}_3$ , 298 K)  $\delta$  173.5, 152.0, 151.8, 143.1, 139.0, 131.8, 129.8, 125.1, 122.1, 119.6, 119.4, 116.5, 115.3, 113.7, 111.3, 40.1, 37.6, 29.8, 0.1, -1.9; HRMS (ESI<sup>+</sup>): calcd for  $\text{C}_{20}\text{H}_{28}\text{N}_3\text{Si}^+$  [M]<sup>+</sup> 338.2053; found 338.2055.

**ASiP<sup>a</sup> 2:** Benzylamine (51  $\mu\text{L}$ , 0.462 mmol) was used as the amine source. Yield = 52 mg (82%).  $^1\text{H}$  NMR ( $\text{CDCl}_3$ , 300 Hz, 298 K)  $\delta$  7.96 (d,  $J = 8.7$  Hz, 1H), 7.40–7.38 (m, 2H), 7.34–7.29 (m, 5H), 7.23–7.19 (m, 2H), 6.96 (d,  $J = 2.7$  Hz, 1H), 6.84 (d,  $J = 2.4$  Hz, 1H), 6.82 (dd,  $J = 8.7, 2.7$  Hz, 1H), 6.66 (dd,  $J = 8.7, 2.7$  Hz, 1H), 5.04 (s, 2H), 2.99 (s, 6H), 2.97 (s, 6H), 0.48 (s, 6H);  $^{13}\text{C}$  NMR ( $\text{CDCl}_3$ , 75 MHz, 298 K):  $\delta$  167.9, 150.2, 149.8, 141.2, 139.9, 136.3, 135.5, 129.7, 128.6, 128.5, 127.6, 127.3, 127.0, 126.8, 126.6, 116.1, 114.9, 113.9, 111.4, 56.8, 40.6, 40.3, -2.2; HRMS (ESI<sup>+</sup>): calcd for

$C_{26}H_{32}N_3Si^+ [M]^+$  414.2366; found 414.2362.

**ASiP<sup>a</sup> 3:** Propargylamine (30  $\mu$ L, 0.462 mmol) was used as the amine source. Yield = 40 mg (71%).  $^1H$  NMR (300 Hz,  $CDCl_3$ , 298 K):  $\delta$  7.54 (d,  $J$  = 8.4 Hz, 1H), 7.44 (d,  $J$  = 8.7 Hz, 1H), 6.93 (dd,  $J$  = 8.7, 2.4 Hz, 2H), 6.76 (dd,  $J$  = 8.7, 2.7 Hz, 1H), 6.70 (dd,  $J$  = 8.4, 2.7 Hz, 1H), 6.11 (s, 1H), 5.50 (t,  $J$  = 5.4 Hz, 1H), 4.01–3.99 (m, 2H), 2.99 (d,  $J$  = 4.2 Hz, 12H), 2.14 (t,  $J$  = 2.1 Hz, 1H), 0.47 (s, 6H);  $^{13}C$  NMR ( $CDCl_3$ , 125 MHz, 298 K):  $\delta$  168.5, 149.9, 149.5, 139.6, 136.6, 135.8, 129.4, 128.2, 127.3, 116.1, 114.7, 113.9, 111.4, 83.1, 70.7, 43.6, 40.5, 40.2, -2.4; HRMS (ESI<sup>+</sup>): calcd for  $C_{22}H_{28}N_3Si^+ [M]^+$  362.2053; found 362.2050.

**ASiP<sup>a</sup> 4:** 3-Azidopropylamine (prepared according to reported procedure<sup>4</sup>; 47 mg, 0.462 mmol) was used as the amine source. Yield = 61 mg (73%)  $^1H$  NMR ( $CDCl_3$ , 300MHz, 298K):  $\delta$  7.81 (d,  $J$  = 8.7 Hz, 1H), 7.38 (d, d,  $J$  = 8.7 Hz, 1H), 6.98 (d,  $J$  = 2.7 Hz, 1H), 6.87 (d,  $J$  = 2.7 Hz, 1H), 6.83 (dd,  $J$  = 8.7, 2.7 Hz, 1H), 6.75 (dd,  $J$  = 8.7, 2.7 Hz, 1H), 3.90 (t,  $J$  = 6.3 Hz, 2H), 3.46 (t,  $J$  = 6.3 Hz, 2H), 3.04 (s, 6H), 3.00 (s, 6H), 2.08 (m, 2H), 0.49 (s, 6H).  $^{13}C$  NMR ( $CDCl_3$ , 75 MHz, 298 K):  $\delta$  166.7, 150.0, 149.5, 139.7, 136.4, 136.0, 129.7, 128.0, 127.6, 115.9, 114.9, 113.9, 111.3, 50.8, 49.7, 40.6, 40.3, 31.1, -2.3.

**ASiP<sup>a</sup> 5:** But-3-en-1-amine (42  $\mu$ L, 0.462 mmol) was used as the amine source. Yield = 63 mg (80%)  $^1H$  NMR ( $CDCl_3$ , 500MHz, 298K):  $\delta$  8.06 (d,  $J$  = 8.5 Hz, 1H), 7.51 (d,  $J$  = 8.5 Hz, 1H), 6.92 (s, 1H), 6.83 (m, 3H), 5.66 (m, 1H), 5.07 (m, 2H), 4.07 (t,  $J$  = 6.5 Hz, 2H), 3.13 (s, 6H), 3.07 (s, 6H), 2.67 (q,  $J$  = 6.5 Hz, 2H), 0.47 (s, 6H).  $^{13}C$  NMR ( $CDCl_3$ , 125 MHz, 298K)  $\delta$  173.72, 151.8, 151.6, 142.4, 138.7, 133.3, 131.6, 129.4, 125.1, 123.8, 122.0, 119.7, 119.4, 118.4, 116.3, 115.1, 113.5, 111.2, 49.7, 39.9, 33.1, 0.0, -2.2.

**ASiP<sup>a</sup> 6:** *tert*-Butyl 4-aminobutanoate (55 mg, 0.462 mmol) was used as the amine source. Yield = 52 mg (60%).  $^1H$  NMR ( $CDCl_3$ , 500MHz, 298K):  $\delta$  8.00 (d,  $J$  = 9.0 Hz, 1H), 7.64 (d,  $J$  = 9.0 Hz, 1H), 6.92 (d,  $J$  = 2.0 Hz, 1H), 6.86 (m, 3H), 4.06 (t,  $J$  = 6.5 Hz, 2H), 3.13 (s, 6H), 3.07 (s, 6H), 2.40 (t,  $J$  = 6.5 Hz, 2H), 2.17 (t,  $J$  = 6.5 Hz, 2H), 1.33 (s, 9H), 0.48 (s, 6H).  $^{13}C$  NMR ( $CDCl_3$ , 125 MHz, 298K):  $\delta$  173.3, 172.9, 151.9, 151.7, 142.4, 138.8, 132.1, 129.3, 125.0, 119.3, 116.2, 115.2, 113.6, 111.5, 81.2, 50.2, 40.0, 39.9, 32.7, 27.9, 24.2, 0.0, -2.0.

**ASiP<sup>a</sup> 7:** *tert*-Butyl 2-aminoethylcarbamate (prepared according to the reported procedure<sup>5</sup>; 74 mg, 0.462 mmol) was used as the amine source. Yield = 65 mg (70%).  $^1H$  NMR ( $CDCl_3$ , 500MHz, 298K):  $\delta$  7.84 (d,  $J$  = 8.5 Hz, 1H), 7.59 (d,  $J$  = 9.0 Hz, 1H), 6.90 (d,  $J$  = 2.0 Hz, 1H), 6.82 (m, 3H), 4.09 (t,  $J$  = 4.5 Hz, 2H), 3.59 (q,  $J$  = 4.5 Hz, 2H), 3.12 (s, 6H), 3.09 (s, 6H), 1.33 (s, 9H), 0.47 (s, 6H).  $^{13}C$  NMR ( $CDCl_3$ , 125 MHz, 298 K):  $\delta$  173.9, 158.0, 152.0, 151.9, 142.7, 139.2, 132.2, 129.4, 125.0, 122.0, 119.5, 119.2, 116.4, 115.4, 113.3, 111.6, 80.1, 77.4, 52.5, 40.0, 39.7, 28.3, 0.0, -2.0.

**ASiP<sup>a</sup> 8:** 3-Chloropropylamine hydrochloride (60 mg, 0.462 mmol) was used as the amine source. Yield = 58 mg (70%).  $^1H$  NMR ( $CDCl_3$ , 300MHz, 298K):  $\delta$  7.87 (d,  $J$  = 8.4 Hz, 1H), 7.41 (d,  $J$  = 8.4 Hz, 1H), 6.95 (d,  $J$  = 2.7 Hz, 1H), 6.84 (m, 2H), 6.73 (dd,  $J$  = 9.0, 2.7 Hz, 1H), 3.99 (t,  $J$  = 6.3 Hz, 2H), 3.69 (t,

$J = 6.3$  Hz, 2H), 3.04 (s, 6H), 3.00 (s, 6H), 2.29 (m, 2H), 0.48 (s, 6H).  $^{13}\text{C}$  NMR ( $\text{CDCl}_3$ , 75 MHz, 298 K):  $\delta$  168.2, 150.3, 149.9, 140.3, 136.5, 134.5, 130.1, 128.4, 126.4, 116.0, 115.0, 113.9, 111.3, 50.2, 43.3, 40.5, 40.3, 34.1, -2.3.

**ASiP<sup>a</sup> 9:** 4-(2-Aminoethyl)morpholine (61  $\mu\text{L}$ , 0.462 mmol) was used as the amine source. Yield = 65 mg (72%).  $^1\text{H}$  NMR ( $\text{CDCl}_3$ , 300MHz, 298K):  $\delta$  8.51 (d,  $J = 9.0$  Hz, 1H), 7.63 (d,  $J = 9.0$  Hz, 1H), 6.91 (m, 2H), 6.78 (d,  $J = 2.4$  Hz, 1H), 6.72 (dd,  $J = 9.0, 2.4$  Hz, 1H), 4.18 (t,  $J = 6.0$  Hz, 2H), 3.56 (t,  $J = 6.0$  Hz, 4H), 3.10 (s, 6H), 3.06 (s, 6H), 2.41 (s, 4H), 0.47 (s, 6H).  $^{13}\text{C}$  NMR ( $\text{CDCl}_3$ , 125 MHz, 298 K):  $\delta$  173.8, 151.9, 151.5, 142.1, 138.6, 131.3, 131.0, 125.6, 121.0, 116.3, 115.0, 113.5, 111.3, 66.8, 57.0, 53.6, 47.0, 40.1, -1.9.

**ASiP<sup>a</sup> 11:** *N*-(2-(2,2'-Dipicolylamino)ethyl)aniline (prepared according to the reported procedure<sup>6</sup>: 63 mg, 0.462 mmol) was used as the amine source. Yield = 49 mg (83%).  $^1\text{H}$  NMR ( $\text{CDCl}_3$ , 500MHz, 298K):  $\delta$  8.00 (d,  $J = 8.5$  Hz, 1H), 7.56 (d,  $J = 9.0$  Hz, 1H), 7.07 (t,  $J = 8.5$  Hz, 1H), 6.87 (m, 3H), 6.67 (m, 4H), 4.19 (t,  $J = 5.5$  Hz, 2H), 3.67 (t,  $J = 5.5$  Hz, 2H), 3.11 (s, 6H), 3.07 (s, 6H), 0.41 (s, 6H).  $^{13}\text{C}$  NMR ( $\text{CDCl}_3$ , 125 MHz, 298 K):  $\delta$  174.3, 152.0, 151.8, 147.3, 142.4, 139.0, 131.6, 129.8, 129.5, 129.3, 125.3, 122.1, 119.9, 117.6, 116.3, 115.3, 113.7, 112.9, 111.5, 77.4, 49.5, 42.6, 40.1, 40.0, -2.14.

#### Scheme S2. Synthetic scheme of ASiP<sup>a</sup> 10.

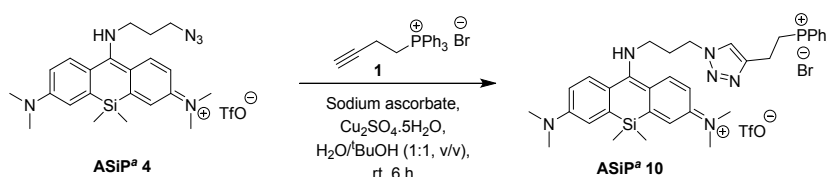

#### Synthesis of ASiP<sup>a</sup> 10.

To a mixture of ASiP<sup>a</sup> 4 (56 mg, 0.10 mmol) and alkyne 1 (40 mg, 0.10 mmol) was added  $t\text{BuOH}$  (3 mL) and  $\text{H}_2\text{O}$  (3 mL), and then a separately prepared 1.0 M solution of sodium ascorbate (100  $\mu\text{L}$ , 0.10 mmol) was added to the reaction mixture, followed by  $\text{CuSO}_4 \cdot 5\text{H}_2\text{O}$  (2.5 mg, 0.01 mmol). After being stirred for 6 h at room temperature, the reaction mixture was diluted with dichloromethane (30 mL) and washed with water (30 mL). The organic layer was evaporated and the residue was subjected to flash column chromatography ( $\text{CH}_2\text{Cl}_2/\text{MeOH} = 99/1$ ) to obtain the pure product (52 mg, 54%) as a red solid.  $^1\text{H}$  NMR ( $\text{CDCl}_3$ , 500MHz, 298K):  $\delta$  8.47 (s, 1H), 8.44 (d,  $J = 9.0$  Hz, 1H), 7.81 (m, 9H), 7.68 (m, 6H), 7.46 (d,  $J = 8.5$  Hz, 1H), 6.86 (s, 1H), 6.81 (d,  $J = 8.5$  Hz, 1H), 6.75 (s, 2H), 4.38 (t,  $J = 6.0$  Hz, 2H), 4.05 (m, 4H), 3.13 (m, 2H), 3.07 (s, 6H), 3.02 (s, 6H), 2.66 (t,  $J = 6.5$  Hz, 2H), 0.43 (s, 6H).  $^{13}\text{C}$  NMR ( $\text{CDCl}_3$ , 125 MHz, 298 K):  $\delta$  173.6, 151.9, 151.7, 144.3, 144.2, 142.3, 139.1, 135.4, 135.3, 133.9, 133.8, 131.5, 131.0, 130.7, 124.9, 124.2, 119.9, 118.1, 117.4, 116.4, 115.2, 113.3, 111.9, 47.6, 47.2, 40.1 (d), 29.8, 23.0, 22.6, 19.4 (d), -1.9.

#### Scheme S3. Synthetic scheme of NIR-ASiP<sup>a</sup> 1.

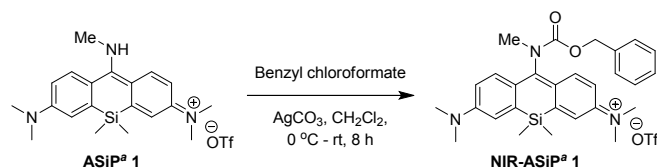

### Synthesis of NIR-ASiP<sup>a</sup> 1.

A solution of ASiP<sup>a</sup> **1** (49 mg, 0.1 mmol) in anhydrous dichloromethane (5 mL) at 0 °C was treated with benzyl chloroformate (141 μL, 1.0 mmol) and Ag<sub>2</sub>CO<sub>3</sub> (276 mg, 1.0 mmol). After keeping the reaction mixture at room temperature, it was allowed to stir for 8 h, and then it was diluted with dichloromethane and washed with 1 N HCl. The organic layer was evaporated and the residue was subjected to flash column chromatography (eluent, CH<sub>2</sub>Cl<sub>2</sub>/MeOH = 95/5) to collect the product, which was further purified by preparative HPLC to obtain the pure product (22 mg, 35%) as a deep blue coloured solid which was used for spectroscopic analysis. <sup>1</sup>H NMR (CD<sub>3</sub>CN, 500 MHz, 298 K): δ 7.62–7.21 (d, *J* = 10 Hz, 2H), 7.23–7.18 (m, 4H), 7.01 (d, *J* = 6.5 Hz, 2H), 6.85 (dd, *J* = 9.5, 2.5 Hz, 2H), 5.01 (s, 2H), 3.32 (s, 12H), 3.27 (s, 3H), 0.53 (s, 3H), 0.49 (s, 3H); <sup>13</sup>C NMR (CD<sub>3</sub>OD, 125 MHz, 298 K): δ 156.7, 156.2, 150.1, 138.8, 137.5, 129.5, 129.3, 128.9, 126.6, 122.7, 116.5, 69.1, 41.2, 39.7, –0.9, –1.5; HRMS (ESI<sup>+</sup>): calcd for C<sub>28</sub>H<sub>34</sub>N<sub>3</sub>O<sub>2</sub>Si<sup>+</sup> [M]<sup>+</sup> 472.2420; found 472.2422.

### Scheme S4. Synthetic scheme of NIR-ASiP<sup>a</sup> 2–4.

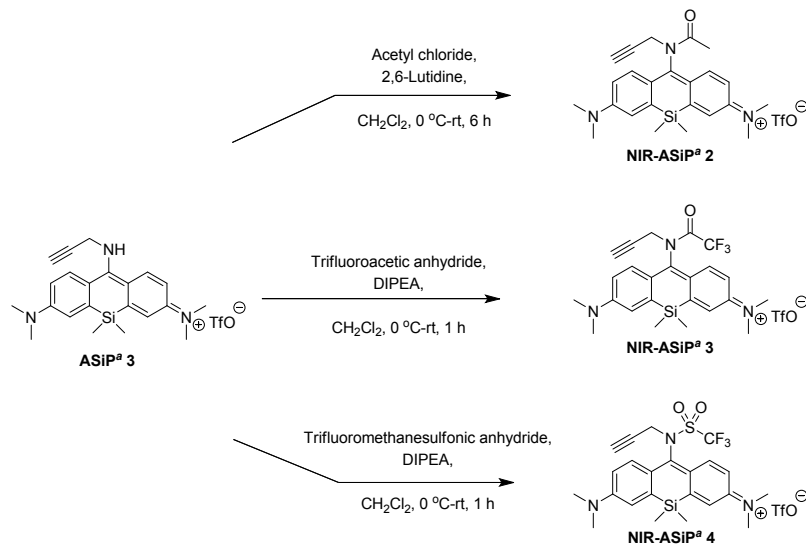

### Synthesis of NIR-ASiP<sup>a</sup> 2.

A solution of ASiP<sup>a</sup> **3** (51 mg, 0.1 mmol) in anhydrous dichloromethane (5 mL) at 0 °C was treated with 2,6-lutidine (87 μL, 0.75 mmol), and the resulting mixture was stirred for 5 min at 0 °C and then treated with acetyl chloride (36 μL, 0.5 mmol). The resulting mixture, after being stirred at room temperature for 6 h, was diluted with dichloromethane and washed with 1 N HCl. The organic layer was evaporated and the residue was subjected to column chromatography (eluent: CH<sub>2</sub>Cl<sub>2</sub>/MeOH = 95/5) to afford the pure dye NIR-ASiP<sup>a</sup> **2** (41 mg, 63%) as a green solid. <sup>1</sup>H NMR (500 Hz, CD<sub>3</sub>OD,

298 K):  $\delta$  7.75 (d, 9.5 Hz, 2H), 7.38 (d, 2.5 Hz, 2H), 7.07 (dd, 10.0, 3.0 Hz, 2H), 4.57 (d, 2.5 Hz, 2H), 3.42 (s, 12H), 2.75 (d, 2.5 Hz, 1H), 1.89 (s, 3H), 0.60 (s, 3H), 0.56 (s, 3H);  $^{13}\text{C}$  NMR ( $\text{CD}_3\text{OD}$ , 125 MHz, 298 K):  $\delta$  171.7, 156.2, 149.8, 139.4, 126.9, 123.3, 116.7, 78.4, 76.1, 41.3, 41.0, 22.1, -0.7, -1.5.

#### Synthesis of NIR-ASiP<sup>a</sup> 3.

A solution of ASiP<sup>a</sup> 3 (51 mg, 0.1 mmol) in anhydrous dichloromethane (5 mL) at 0 °C was treated with diisopropylethylamine (88  $\mu\text{L}$ , 0.5 mmol) followed by trifluoroacetic anhydride (42  $\mu\text{L}$ , 0.3 mmol). The resulting mixture, after being stirred at room temperature for 1 h, was diluted with dichloromethane and washed with 1 *N* HCl. The organic layer was evaporated and the residue was subjected to column chromatography (eluent:  $\text{CH}_2\text{Cl}_2/\text{MeOH} = 95/5$ ) to afford the pure dye NIR-ASiP<sup>a</sup> 3 (44 mg, 72%) as a green solid.  $^1\text{H}$  NMR (500 Hz,  $\text{CD}_3\text{OD}$ , 298 K):  $\delta$  7.78 (d,  $J = 10$  Hz, 2H), 7.429 (d,  $J = 3$  Hz, 2H), 7.104 (dd,  $J = 9.5, 2.5$  Hz, 2H), 4.731 (d,  $J = 3$  Hz, 2H), 3.46 (s, 12 H), 2.96 (s, 1H), 0.645 (m, 3H), 0.571 (m, 3H);  $^{13}\text{C}$  NMR ( $\text{CD}_3\text{OD}$ , 125 MHz, 298 K):  $\delta$  155.4, 154.6, 147.9, 137.7, 125.4, 123.6, 115.0, 76.7, 75.3, 42.4, 39.9, -2.2, -3.0.

#### Synthesis of NIR-ASiP<sup>a</sup> 4.

A solution of ASiP<sup>a</sup> 3 (51 mg, 0.1 mmol) in anhydrous dichloromethane (5 mL) at 0 °C was treated with diisopropylethylamine (88  $\mu\text{L}$ , 0.5 mmol) followed by trifluoromethanesulfonic anhydride (84  $\mu\text{L}$ , 0.5 mmol). The resulting mixture, after being stirred at room temperature for 1 h, was diluted with dichloromethane and washed with 1 *N* HCl. The organic layer was evaporated and the residue was subjected to column chromatography (eluent:  $\text{CH}_2\text{Cl}_2/\text{MeOH} = 95/5$ ) to afford the pure dye NIR-ASiP<sup>a</sup> 4 (48 mg, 75%) as a green solid.  $^1\text{H}$  NMR (500 Hz,  $\text{CD}_3\text{OD}$ , 298 K):  $\delta$  7.97 (d,  $J = 10$  Hz, 2H), 7.37 (d,  $J = 3$  Hz, 2H), 7.121 (dd,  $J = 10, 2.0$  Hz, 2H), 4.86 (d,  $J = 4.0$  Hz, 2H), 3.44 (s, 12H), 3.10 (q,  $J = 2.5$  Hz, 1H), 0.60 (s, 6H), 0.53 (s, 6H);  $^{13}\text{C}$  NMR ( $\text{CD}_3\text{OD}$ , 125 MHz, 298 K):  $\delta$  154.5, 148.0, 138.4, 126.3, 122.1, 114.6, 78.2, 75.2, 45.2, 39.8, -2.0, -3.3.

**Scheme S5.** Synthetic scheme of NIR-ASiP<sup>a</sup> **5**.

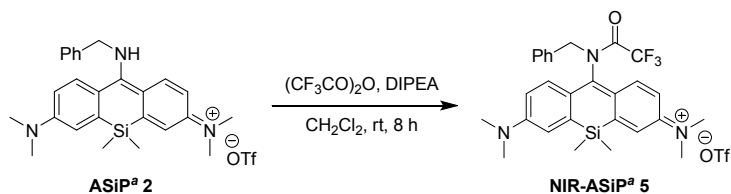

**Synthesis of NIR-ASiP<sup>a</sup> 5.**

A solution of ASiP<sup>a</sup> **2** (56 mg, 0.1 mmol) in anhydrous dichloromethane (5 mL) at 0 °C was treated with diisopropylethylamine (174 μL, 1.0 mmol) followed by trifluoroacetic anhydride (69 μL, 0.5 mmol). The resulting mixture, after being stirred at room temperature for 3 h, was diluted with dichloromethane and washed with 1 *N* HCl. The organic layer was evaporated and the residue was subjected to column chromatography (eluent: CH<sub>2</sub>Cl<sub>2</sub>/MeOH = 95/5) to afford the pure dye NIR-ASiP<sup>a</sup> **5** (51 mg, 78%) as a green solid. <sup>1</sup>H NMR (500 Hz, CD<sub>3</sub>OD, 298 K): δ 7.93 (m, 9H), 6.86 (dd, *J* = 10, 2.5 Hz, 2H), 5.09 (s, 2H), 3.41 (s, 12H), 0.56 (s, 3H), 0.54 (s, 3H); <sup>13</sup>C NMR (CD<sub>3</sub>OD, 125 MHz, 298 K): δ 155.5, 147.8, 137.8, 133.4, 130.9, 128.7, 128.2, 125.4, 121.7, 114.5, 78.1, 56.9, 39.8, -2.5, -2.9.

**Scheme S6.** Synthetic scheme of NIR-ASiP<sup>a</sup> **6**.

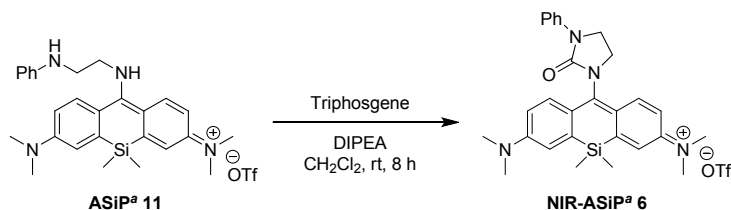

A solution of ASiP<sup>a</sup> **11** (59 mg, 0.1 mmol) in anhydrous dichloromethane (5 mL) was treated with diisopropylethylamine (174 μL, 1.0 mmol) at 0 °C. Triphosgene (89 mg, 0.3 mmol) in 0.5 mL dichloromethane was added drop-wise to the mixture, which was allowed to stir for 8 h at room temperature. The reaction mixture was diluted with dichloromethane, washed with 1 *N* HCl, and the organic layer was evaporated. The residue was subjected to flash column chromatography (eluent, CH<sub>2</sub>Cl<sub>2</sub>/MeOH = 95/5) to afford the pure dye NIR-ASiP<sup>a</sup> **6** (44 mg, 72%) as a green solid. <sup>1</sup>H NMR (500 Hz, CD<sub>3</sub>OD, 298 K): δ 7.90 (d, *J* = 9.5 Hz, 2H), 7.65 (d, *J* = 7.5 Hz, 2H), 7.40 (t, *J* = 7.5 Hz, 2H), 7.34 (d, *J* = 2.5 Hz, 2H), 7.14 (t, *J* = 7.5 Hz, 1H), 7.05 (dd, *J* = 9.5, 3.0 Hz, 2H), 4.35 (q, *J* = 6.5 Hz, 2H), 4.05 (q, *J* = 6.5 Hz, 2H), 3.40 (s, 12H), 0.58 (s, 6H); <sup>13</sup>C NMR (CD<sub>3</sub>OD, 125 MHz, 298 K): δ 156.2, 139.2, 130.1, 124.8, 122.8, 119.8, 116.4, 56.0, 49.6, 49.4, 43.9, 41.2, 18.8, 17.4, 13.2, -1.03.



### Scheme S7. Synthetic scheme of julolidine derived ASiP<sup>j</sup> 1–3 dyes.

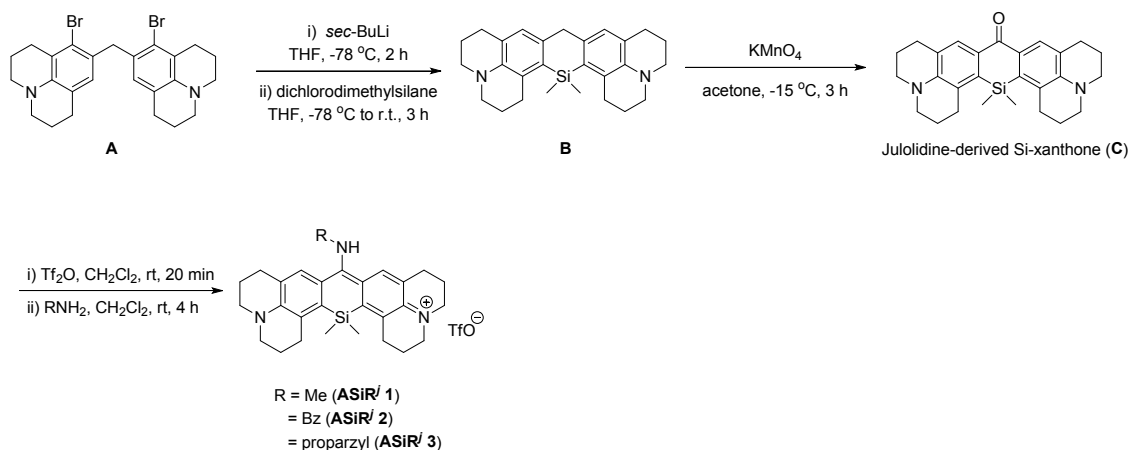

#### Synthesis of julolidine-derived Si-xanthone (**C**).

A solution of dibromide **A** (prepared according to the reported procedure<sup>7</sup>; 200 mg, 0.39 mmol) in anhydrous THF (15 mL) at -78 °C was treated with *sec*-BuLi (1.4 M, 0.84 mL, 1.17 mmol) under Ar-atmosphere, and the resulting mixture was further stirred at -78 °C for 2 h. The reaction mixture was treated with dichloromethylsilane (85 μL, 0.7 mmol) at -78 °C and then stirred at room temperature for 3 h before quenching with 1 N HCl. After neutralization with saturated NaHCO<sub>3</sub>, the mixture was extracted with dichloromethane (2 × 10 mL), and the organic layer was washed with brine followed by drying over anhydrous Na<sub>2</sub>SO<sub>4</sub>. The organic solvent was evaporated to obtain the crude product **B**, which was used for the next step without further purification.

A solution of the compound **B** in acetone (15 mL) at -15 °C was treated with KMnO<sub>4</sub> (185 mg, 1.17 mmol) portionwise over 30 min, and the resulting mixture was stirred for 2 h 30 min at -15 °C. The reaction mixture was diluted with dichloromethane (15 mL) and then filtered through Celite. The filtrate was concentrated and the residue was purified with column chromatography (eluent, CH<sub>2</sub>Cl<sub>2</sub>/EtOAc = 97/3) to give the julolidine-derived Si-xanthone **C** (33 mg, 20%) as a yellow solid. <sup>1</sup>H NMR (CDCl<sub>3</sub>, 300 MHz, 298K): δ 8.07 (s, 2H), 3.29–3.27 (m, 8H), 2.91–2.80 (m, 8H), 2.03–1.96 (m, 8H), 0.59 (s, 6H); <sup>13</sup>C NMR (CDCl<sub>3</sub>, 125 MHz, 298 K): δ 185.74, 145.5, 136.1, 129.8, 128.5, 124.1, 122.8, 50.6, 50.1, 28.9, 28.3, 22.0, 21.7, 0.3.

#### Synthesis of ASiP<sup>j</sup> 1–3.

Trifluoromethanesulfonic anhydride (21 μL, 0.123 mmol) was added dropwise to a solution of julolidine-derived Si-xanthone **C** (35 mg, 0.082 mmol) in anhydrous CH<sub>2</sub>Cl<sub>2</sub> (3 mL) at 0 °C. The resulting intense green reaction mixture was stirred for 20 min at room temperature and then each of the various amines (3 equivalents) was added at the same temperature. The reaction mixture was further stirred for 4 h at room temperature and then directly loaded onto silica gel for flash chromatography (eluent: MeOH/CH<sub>2</sub>Cl<sub>2</sub> = 3/97), affording the pure dyes ASiP<sup>j</sup> 1–3 as deep-red coloured solids.

**ASiP<sup>j</sup> 1:** Methylamine in THF (2 M, 123 μL, 0.246 mmol) was used as the amine source. Yield = 34

mg (70%).  $^1\text{H}$  NMR ( $\text{CDCl}_3$ , 500 MHz, 298K):  $\delta$  9.82 (s, br, 1H), 7.53 (br, 1H), 7.12 (br, 1H), 3.47 (d,  $J = 5.0$  Hz, 3H), 3.33 (s, br, 8H), 2.83 (s, br, 8H), 1.97 (s, br, 8H), 0.56 (s, 6H);  $^{13}\text{C}$  NMR ( $\text{CDCl}_3$ , 125 MHz, 298 K):  $\delta$  175.1, 146.6, 129.4, 127.0, 124.7, 122.2, 119.6, 50.7, 50.1, 37.9, 29.9, 29.4, 28.0, 26.7, 21.5, 21.2, 0.2, 0.1, -0.1, -0.3; HRMS (ESI $^+$ ): calcd for  $\text{C}_{28}\text{H}_{36}\text{N}_3\text{Si}^+ [\text{M}]^+$  442.2679; found 442.2678.

**ASiP $^j$  2:** Benzylamine (27  $\mu\text{L}$ , 0.246 mmol) was used as the amine source. Yield = 43 mg (85%).  $^1\text{H}$  NMR ( $\text{CDCl}_3$ , 500MHz, 298K):  $\delta$  7.38 (m, 5H), 7.30 (s, br, 2H), 4.93 (s, 2H), 3.35–3.30 (m, 8H), 2.85–2.82 (m, br, 8H), 2.02–1.98 (m, 8H), 0.56 (s, 6H);  $^{13}\text{C}$  NMR ( $\text{CDCl}_3$ , 75 MHz, 298 K):  $\delta$  176.1, 146.8, 137.3, 129.2, 128.1, 127.7, 126.3, 122.9, 118.7, 53.7, 50.7, 50.2, 29.9, 29.4, 27.9, 21.5, 21.1, 0.2, -0.1; HRMS (ESI $^+$ ): calcd for  $\text{C}_{34}\text{H}_{40}\text{N}_3\text{Si}^+ [\text{M}]^+$  518.2992; found 518.2989.

**ASiP $^j$  3:** Propargylamine (16  $\mu\text{L}$ , 0.246 mmol) was used as the amine source. Yield = 39 mg (78%).  $^1\text{H}$  NMR ( $\text{CDCl}_3$ , 300MHz, 298K):  $\delta$  7.59 (s, 2H), 4.44 (d,  $J = 1.8$  Hz, 2H), 3.36–3.34 (m, 8H), 2.85–2.81 (m, 8H), 2.53 (s, 1H), 2.03–1.96 (m, 8H), 0.56 (s, 6H);  $^{13}\text{C}$  NMR ( $\text{CDCl}_3$ , 125 MHz, 298 K):  $\delta$  175.4, 147.0, 128.6, 126.5, 123.0, 122.1, 119.6, 78.4, 74.5, 50.8, 50.2, 39.9, 29.9, 29.4, 27.9, 21.5, 21.1, 0.2, -0.1; HRMS (ESI $^+$ ): calcd for  $\text{C}_{30}\text{H}_{36}\text{N}_3\text{Si}^+ [\text{M}]^+$  466.2679; found 466.2677.

**Scheme S8.** Synthetic scheme of NIR-ASiP $^j$  **1-3** and the probe ASiP $^j$ -H $_2$ O $_2$ .

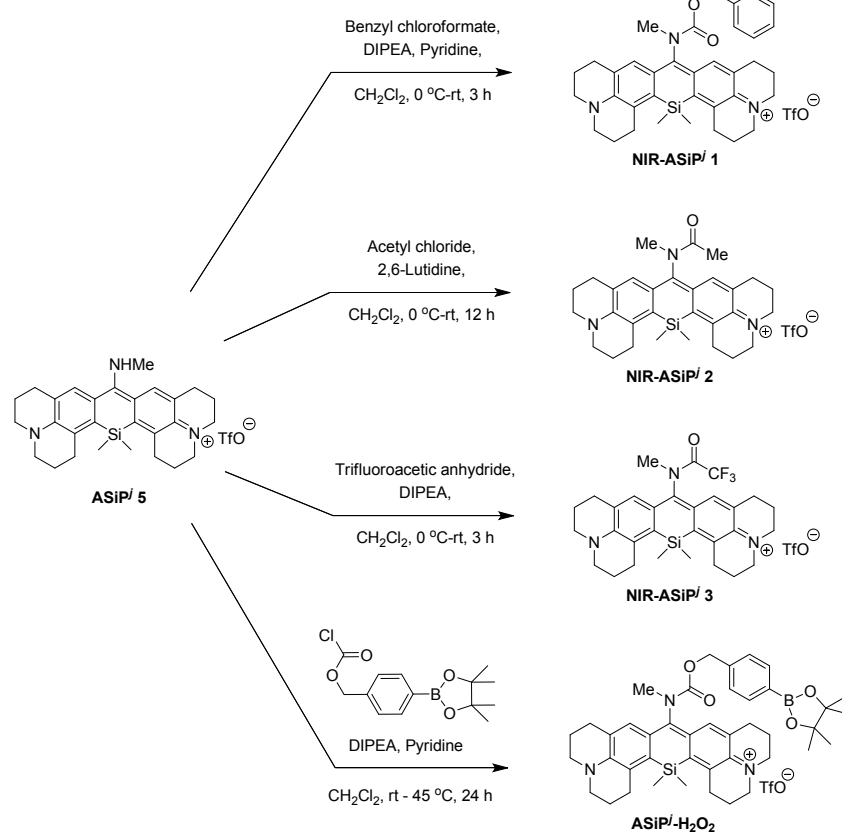

Synthetic procedures of NIR-ASiP $^j$  **1-3** are already described in the main manuscript, here only the synthesis of ASiP $^j$ -H $_2$ O $_2$  is described.

### Synthesis of the probe ASiP<sup>i</sup>-H<sub>2</sub>O<sub>2</sub>.

A solution of ASiP<sup>i</sup> **1** (30 mg, 0.05 mmol) in anhydrous dichloromethane (5 mL) was treated with diisopropylethylamine (44  $\mu$ L, 0.25 mmol) and pyridine (40  $\mu$ L, 0.5 mmol), and the resulting mixture, after being stirred for 10 min at room temperature, was treated with 4-(pinacolboronate)-benzyl chloroformate (0.5 mmol). The reaction mixture was stirred at 45 °C for 24 h, and then it was diluted with dichloromethane and washed with 1 N HCl. The organic layer was evaporated and the residue was subjected to flash column chromatography (eluent, CH<sub>2</sub>Cl<sub>2</sub>/MeOH = 95/5) to afford the product (3 mg, 8%) as a green solid. <sup>1</sup>H NMR (CDCl<sub>3</sub>, 500 MHz, 298 K):  $\delta$  7.81 (d, *J* = 8.0 Hz, 2H), 7.38 (d, *J* = 8 Hz, 2H), 6.93 (s, 2H), 4.72 (s, 2H), 3.77–3.75 (m, br, 4H), 3.64 (br, 4H), 3.39 (s, 3H), 2.95–2.90 (m, br, 4H), 2.75 (br, 4H), 2.13–2.00 (m, 8H), 1.34 (s, 12H), 0.68 (s, 3H), 0.612 (s, 3H); <sup>13</sup>C NMR (CDCl<sub>3</sub>, 125 MHz, 298 K):  $\delta$  155.2, 150.9, 144.3, 141.8, 141.4, 135.3, 133.4, 132.6, 126.3, 125.6, 125.5, 124.4, 122.8, 84.0, 65.5, 52.4, 51.8, 51.7, 41.1, 29.9, 28.9, 28.2, 28.0, 25.1, 21.0, 20.9, 20.7, 1.2, 0.2, -0.7, -1.1; HRMS (ESI<sup>+</sup>): calcd for C<sub>42</sub>H<sub>53</sub>BN<sub>3</sub>O<sub>4</sub>Si<sup>+</sup> [M]<sup>+</sup> 702.3898; found 702.3903.

### References

- (1) (a) Albota, M. A.; Xu, C.; Webb, W. W. *Appl. Optics* **1998**, *37*, 7352. (b) Xu, C.; Webb, W. W. *J. Opt. Soc. Am. B* **1996**, *13*, 481.
- (2) Ishiyama, M.; Miyazono, Y.; Sasamoto, K.; Ohkura, Y.; Ueno, K. *Talanta* **1997**, *44*, 1299; Tominaga, H. *et al. Anal. Commun.* **1999**, *36*, 47.
- (3) Lukinavičius, G.; Umezawa, K.; Olivier, N.; Honigmann, A.; Yang, G.; Plass, T.; Mueller, V.; Reymond, L.; Corrêa, I. R., Jr.; Luo, Z.-G.; Schultz, C.; Lemke, E. A.; Heppenstall, P.; Eggeling, C.; Manley, S.; Johnsson, K. *Nat. Chem.*, **2013**, *5*, 132.
- (4) Hannant, J.; Hedley, H. J.; Pate, J.; Walli, A.; Farha Al-Said, A. S.; Galindo, A. M.; Connolly, A. B.; Horrocks, R. B.; Houlton, A.; Pike, R. A. *Chem. Commun.*, **2010**, *46*, 5870.
- (5) Srinivasachari, S.; Fichter, K. M.; Reineke, T. M. *J. Am. Chem. Soc.*, **2008**, *130*, 4618.
- (6) Maruyama, T.; Fujie, Y.; Oya, N.; Hosaka, E.; Kanazawa, A.; Tanaka, D.; Hattori, Y.; Motoyoshiya, J. *Tetrahedron*, **2011**, *67*, 6927.
- (7) Butkevich, A. N.; Ta, H.; Ratz, M.; Stoldt, S.; Jakobs, S.; Belov, V. N.; Hell, S. W. *ACS Chem. Biol.*, **2018**, *13*, 475.

# <sup>1</sup>H and <sup>13</sup>C NMR spectra for selected dyes

<sup>1</sup>H NMR (CDCl<sub>3</sub>, 500 Hz, 298 K) of ASiP<sup>a</sup> 1

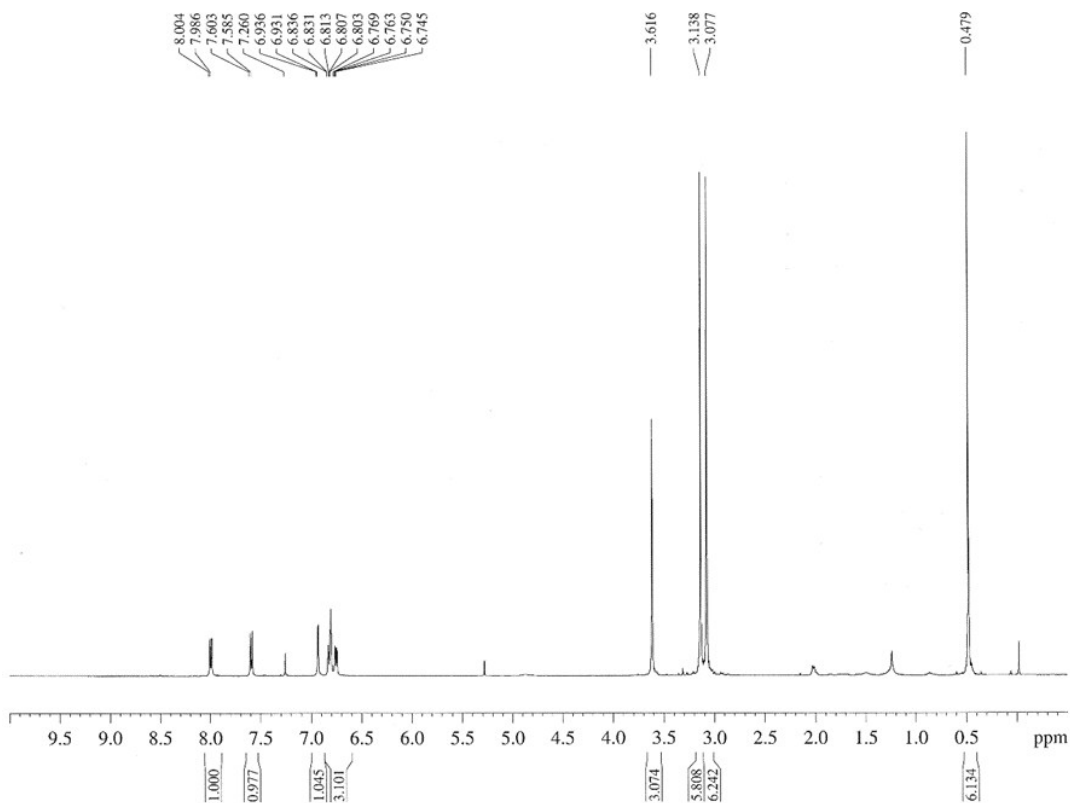

<sup>13</sup>C NMR (CDCl<sub>3</sub>, 125 MHz, 298 K) of ASiP<sup>a</sup> 1

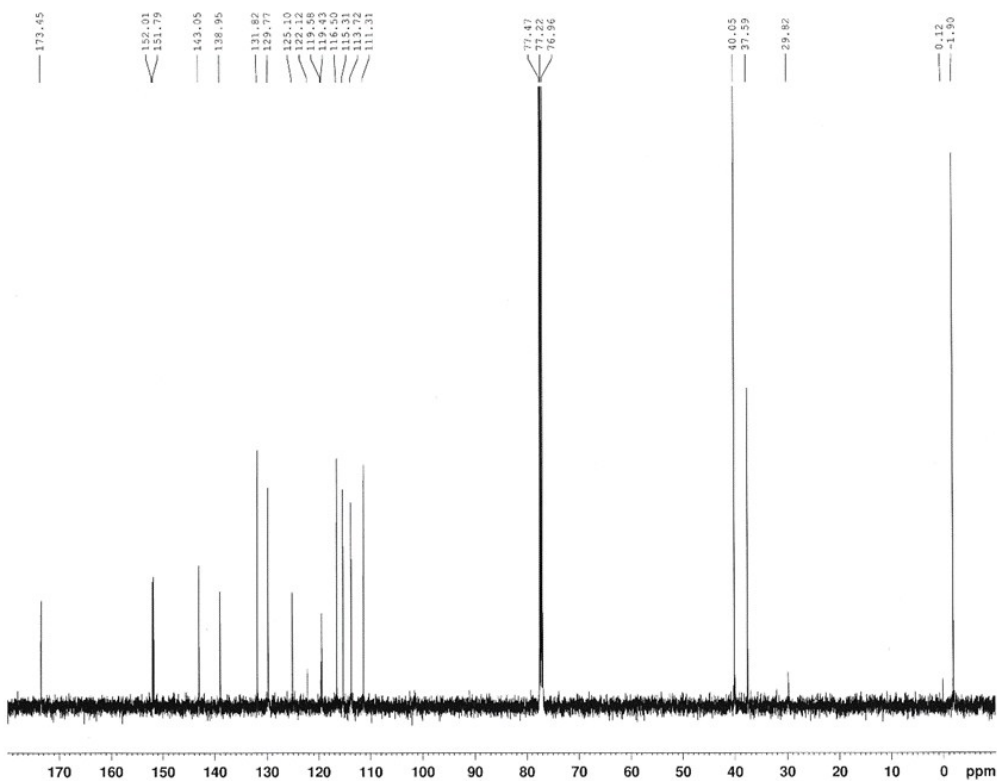

<sup>1</sup>H NMR (CDCl<sub>3</sub>, 300 Hz, 298 K) of ASiP<sup>a</sup> 2

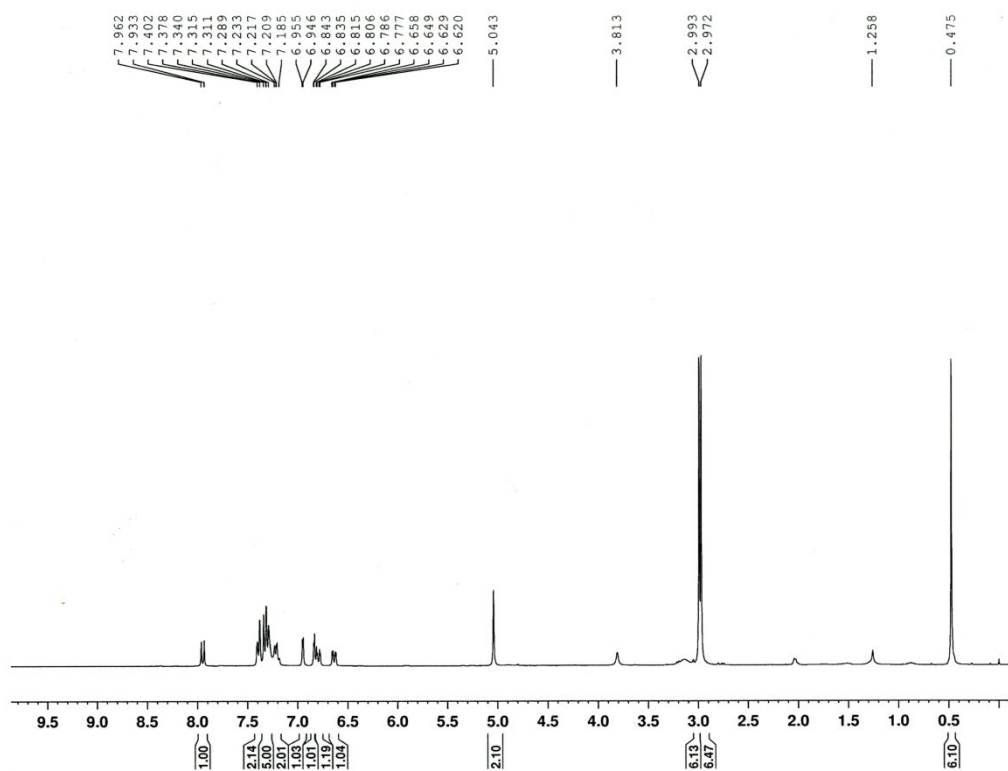

<sup>13</sup>C NMR (CDCl<sub>3</sub>, 75 MHz, 298 K) of ASiP<sup>a</sup> 2

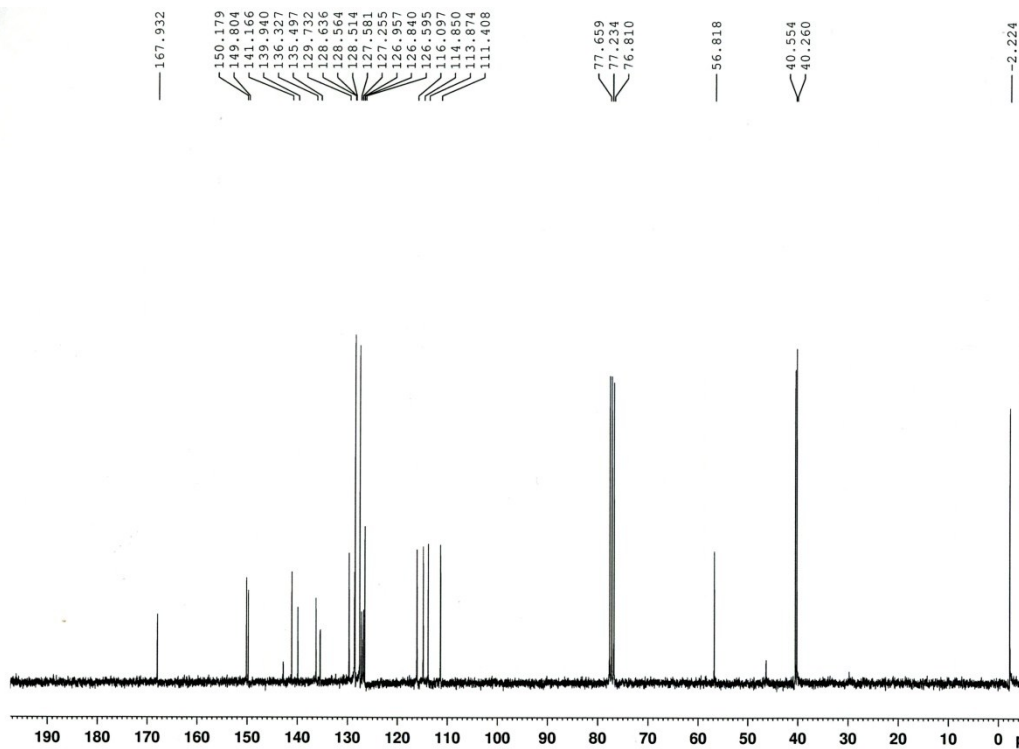

<sup>1</sup>H NMR (CDCl<sub>3</sub>, 300 Hz, 298 K) of ASiP<sup>a</sup> **3**

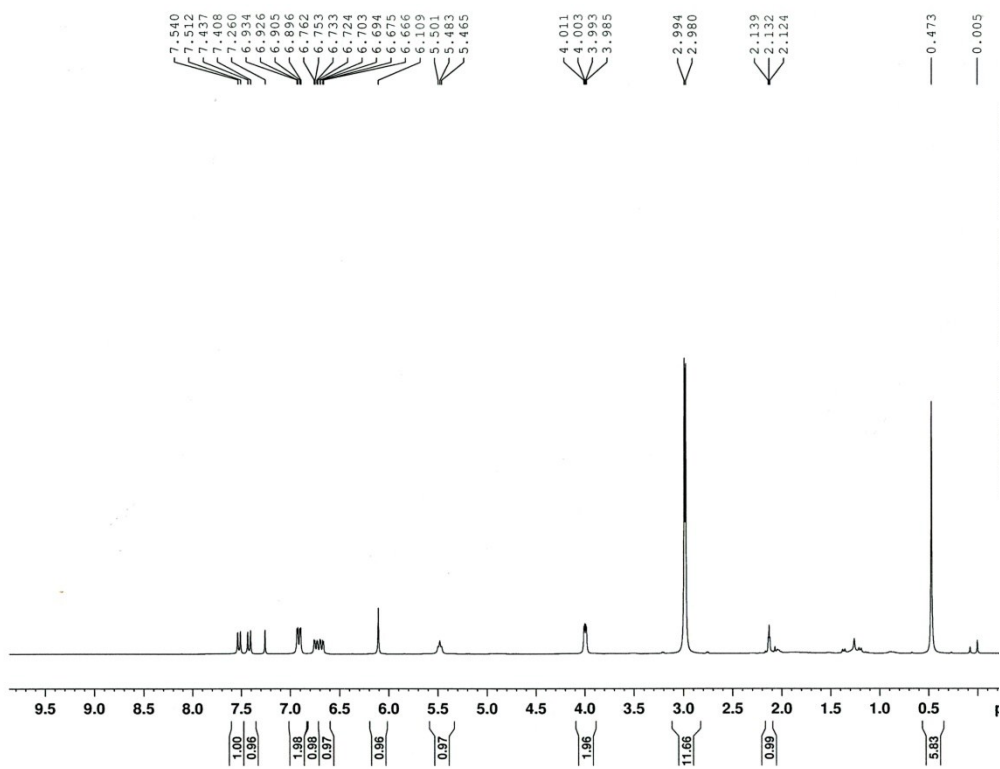

<sup>13</sup>C NMR (CDCl<sub>3</sub>, 125 MHz, 298 K) of ASiP<sup>a</sup> **3**

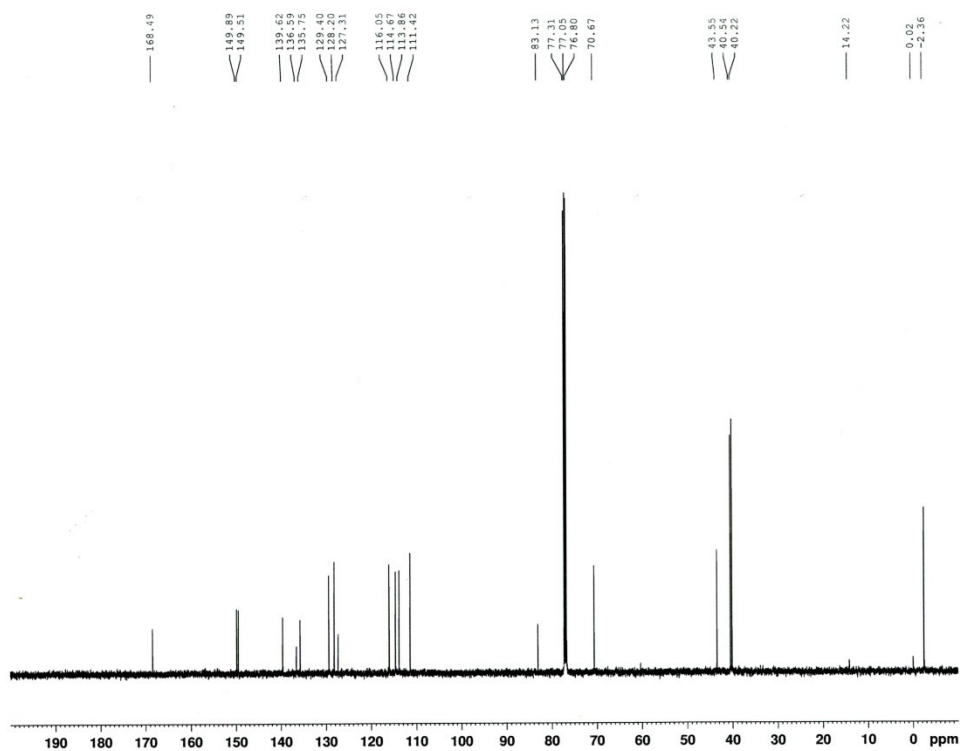

<sup>1</sup>H NMR (CDCl<sub>3</sub>, 300 Hz, 298 K) of ASiP<sup>a</sup> 4

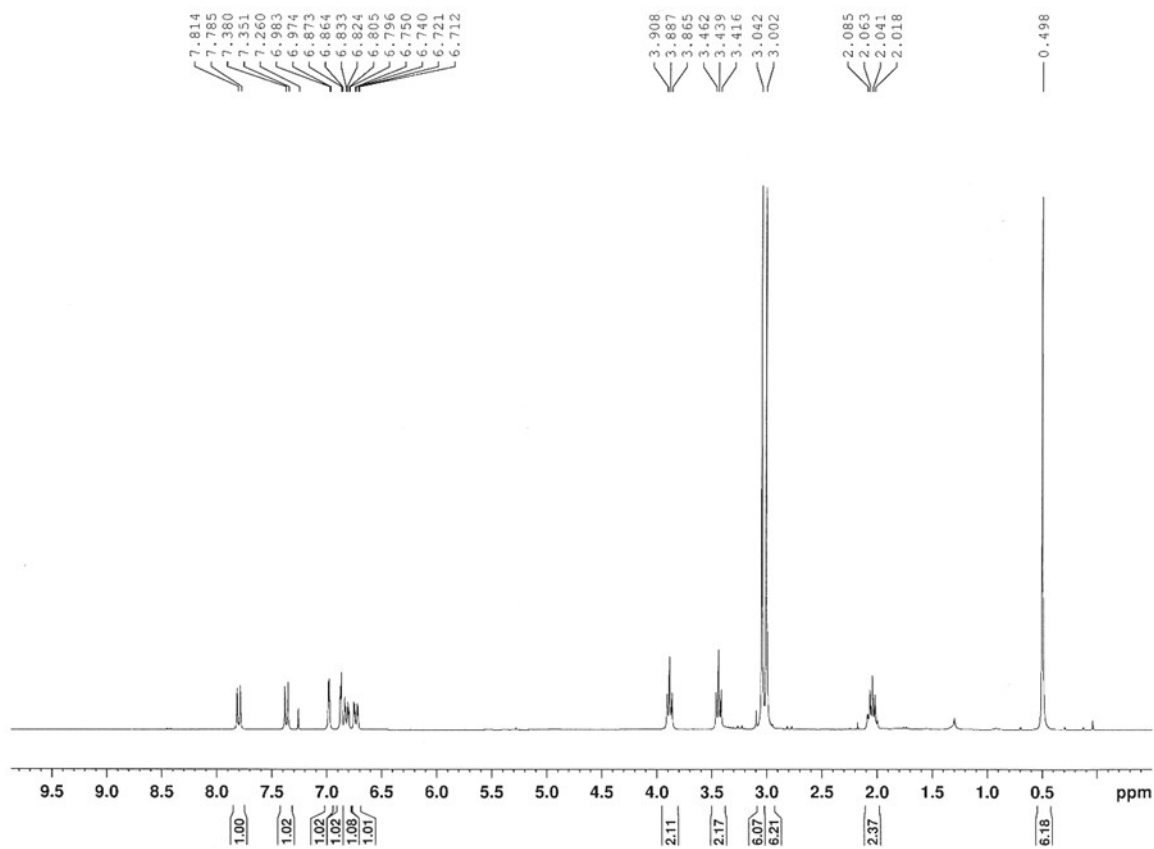

<sup>13</sup>C NMR (CDCl<sub>3</sub>, 75 MHz, 298 K) of ASiP<sup>a</sup> 4

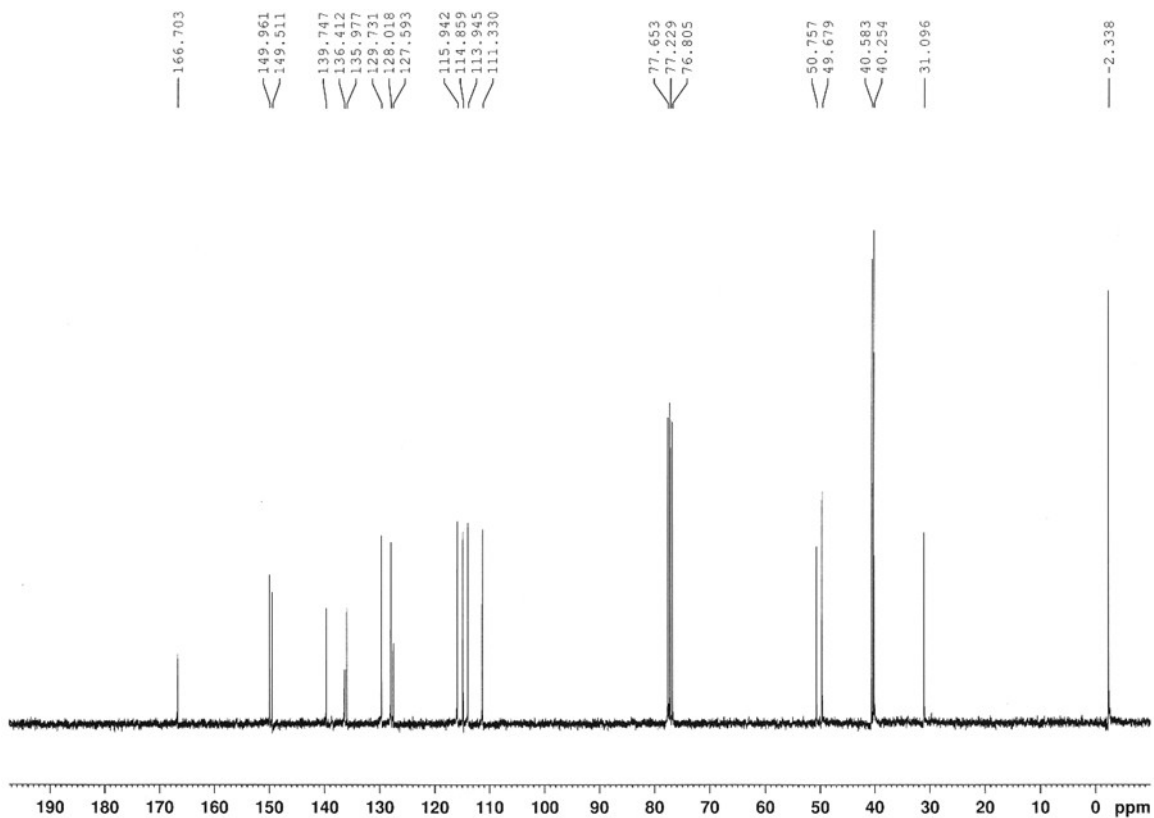

<sup>1</sup>H NMR (CDCl<sub>3</sub>, 500 Hz, 298 K) of ASiP<sup>a</sup> 5

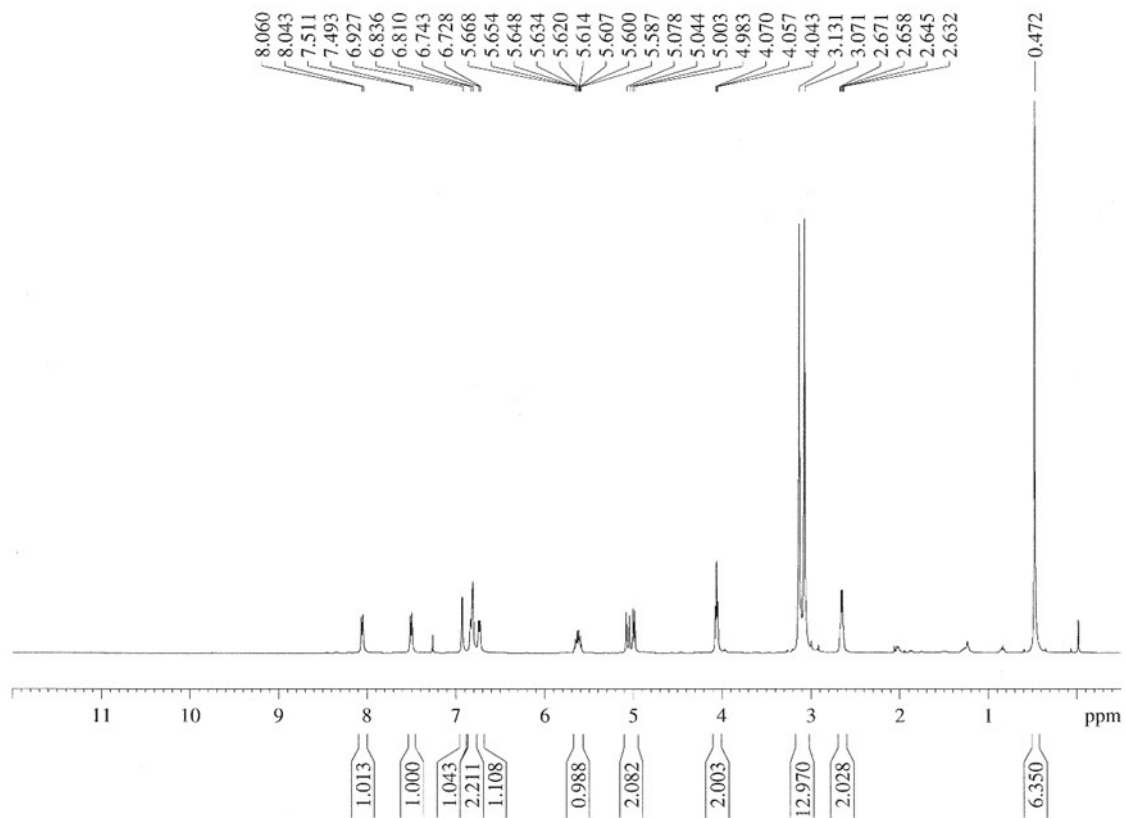

<sup>13</sup>C NMR (CDCl<sub>3</sub>, 125 MHz, 298 K) of ASiP<sup>a</sup> 5

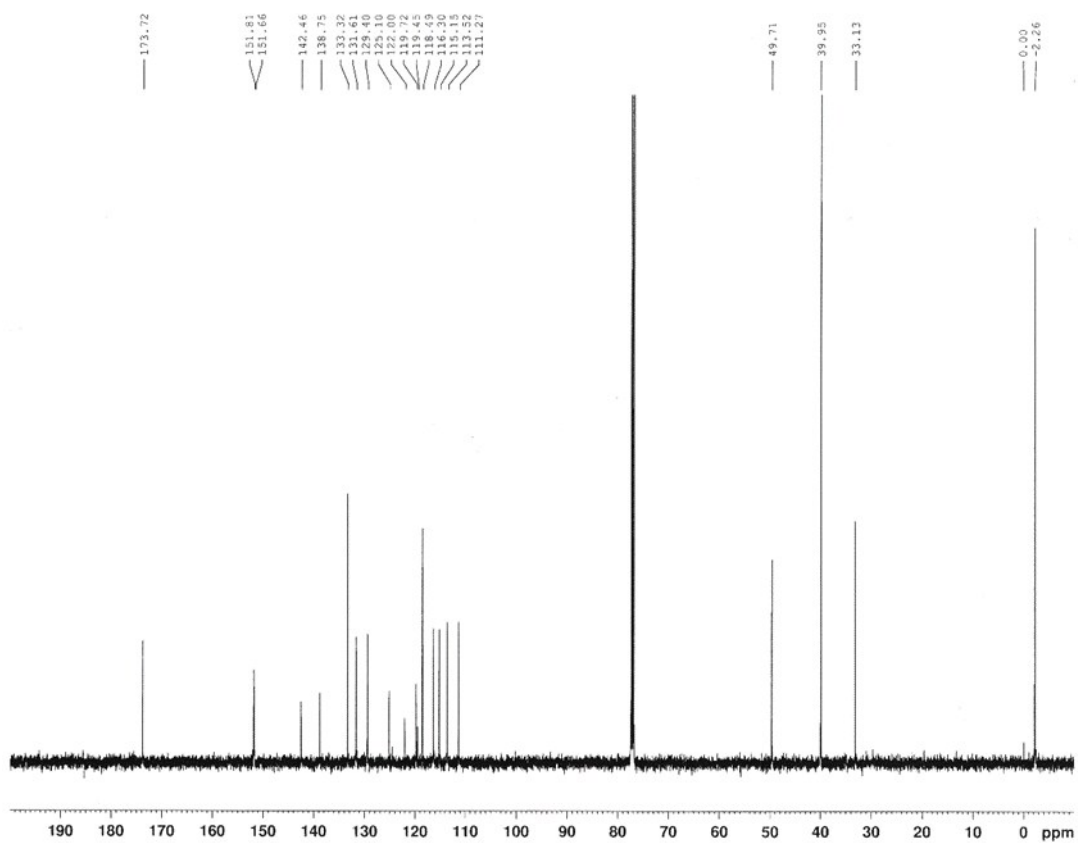



<sup>1</sup>H NMR (CDCl<sub>3</sub>, 500 Hz, 298 K) of ASiP<sup>a</sup> 6

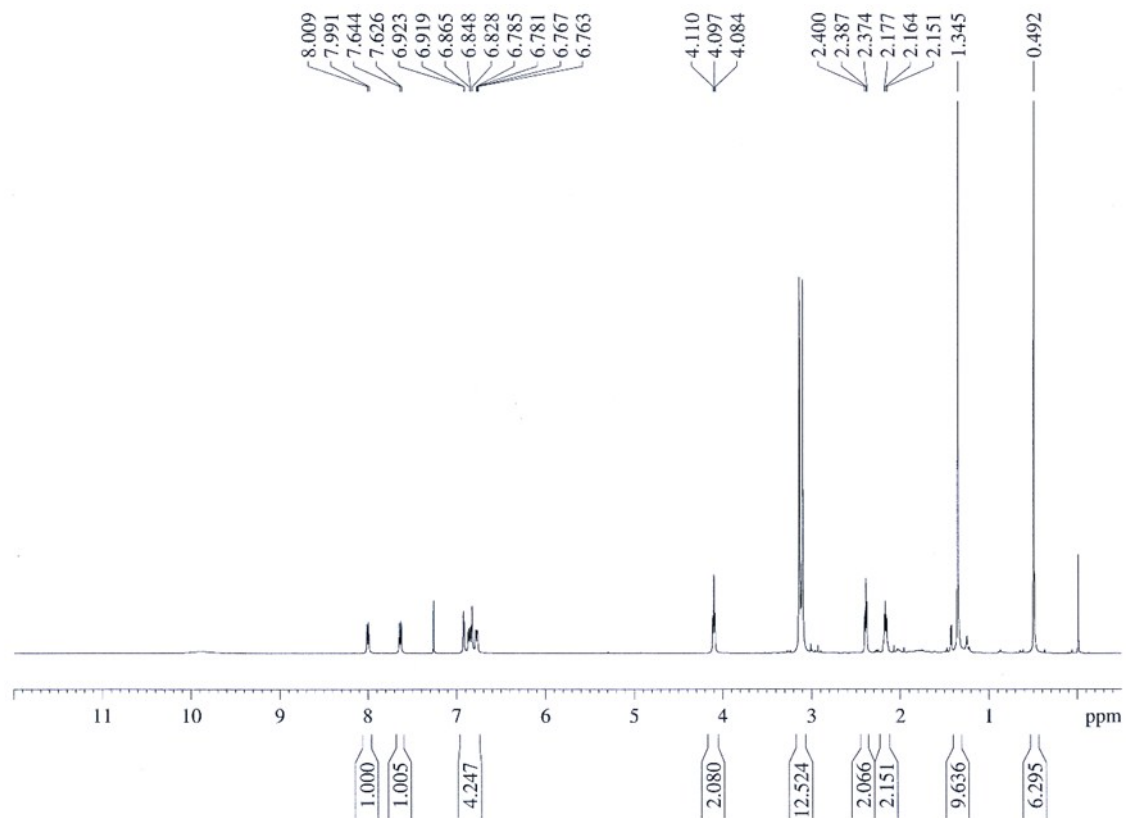

<sup>13</sup>C NMR (CDCl<sub>3</sub>, 125 MHz, 298 K) of ASiP<sup>a</sup> 6

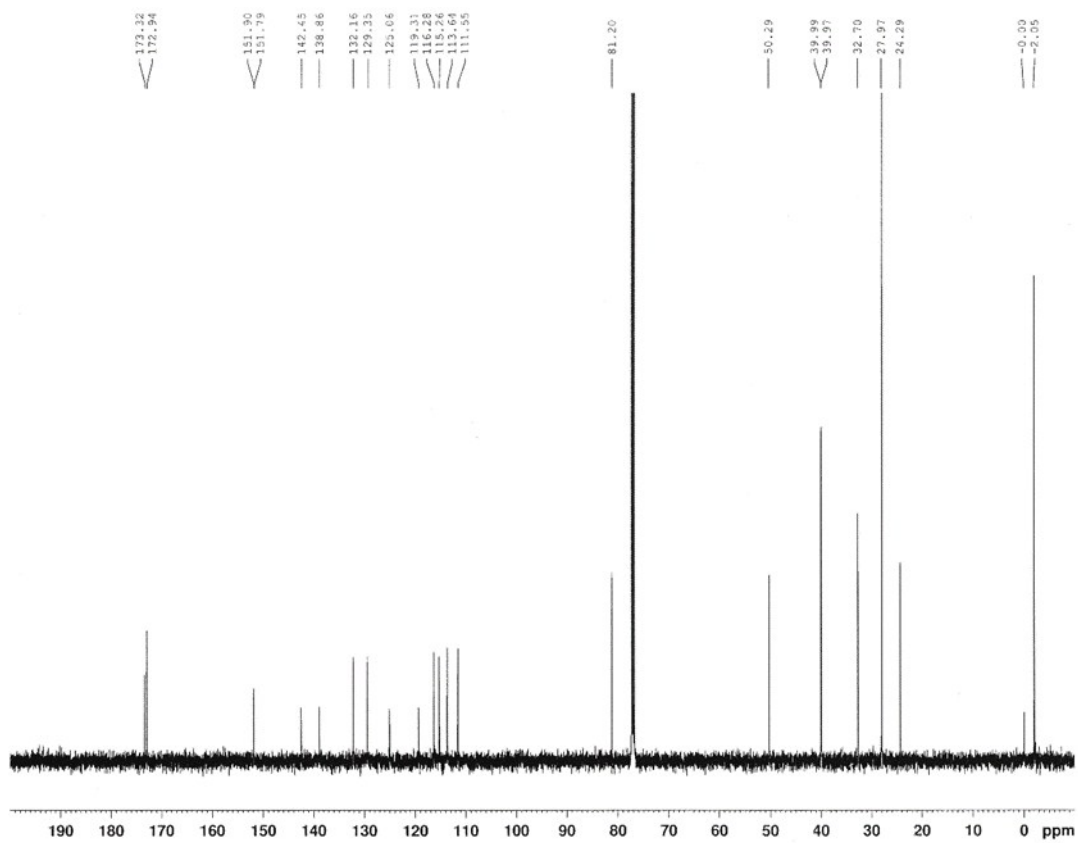

<sup>1</sup>H NMR (CDCl<sub>3</sub>, 500 Hz, 298 K) of ASiP<sup>a</sup> 7

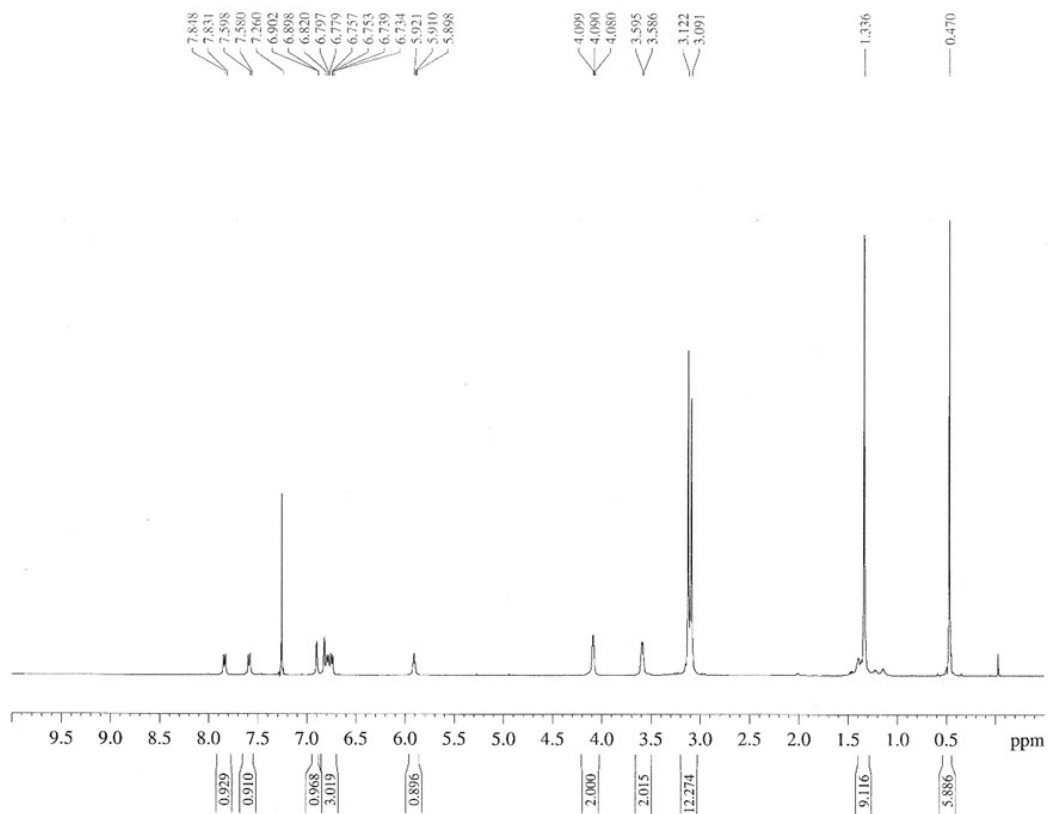

<sup>13</sup>C NMR (CDCl<sub>3</sub>, 125 MHz, 298 K) of ASiP<sup>a</sup> 7

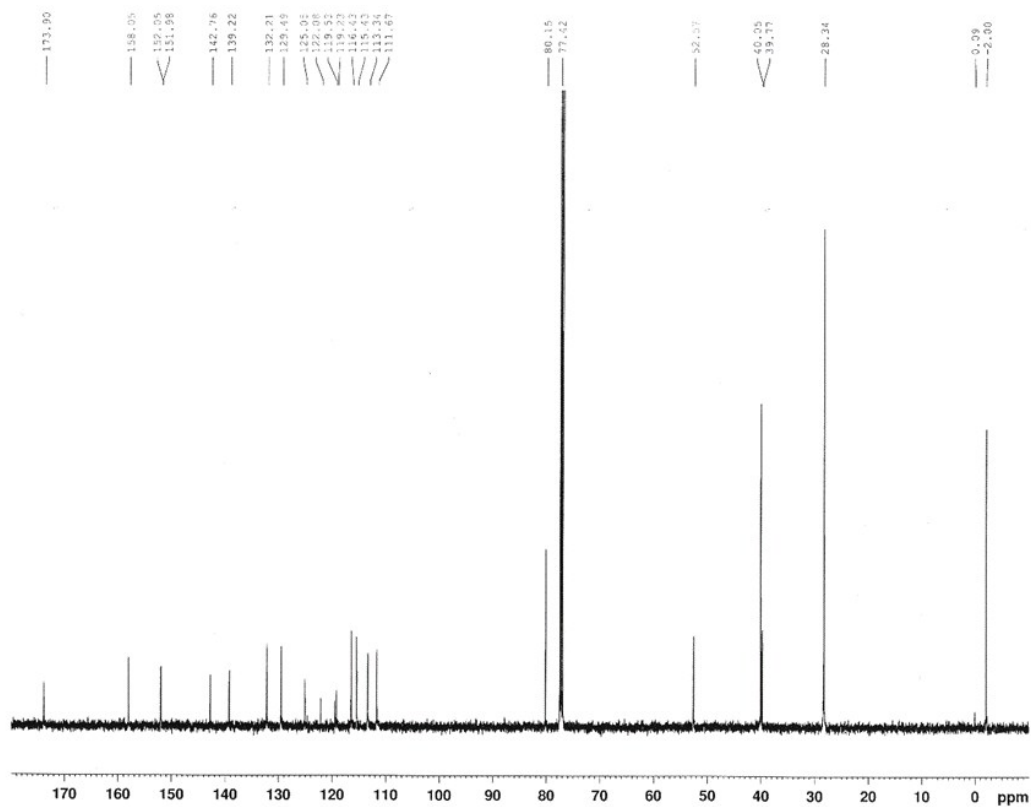

<sup>1</sup>H NMR (CDCl<sub>3</sub>, 300 Hz, 298 K) of ASiP<sup>a</sup> **8**

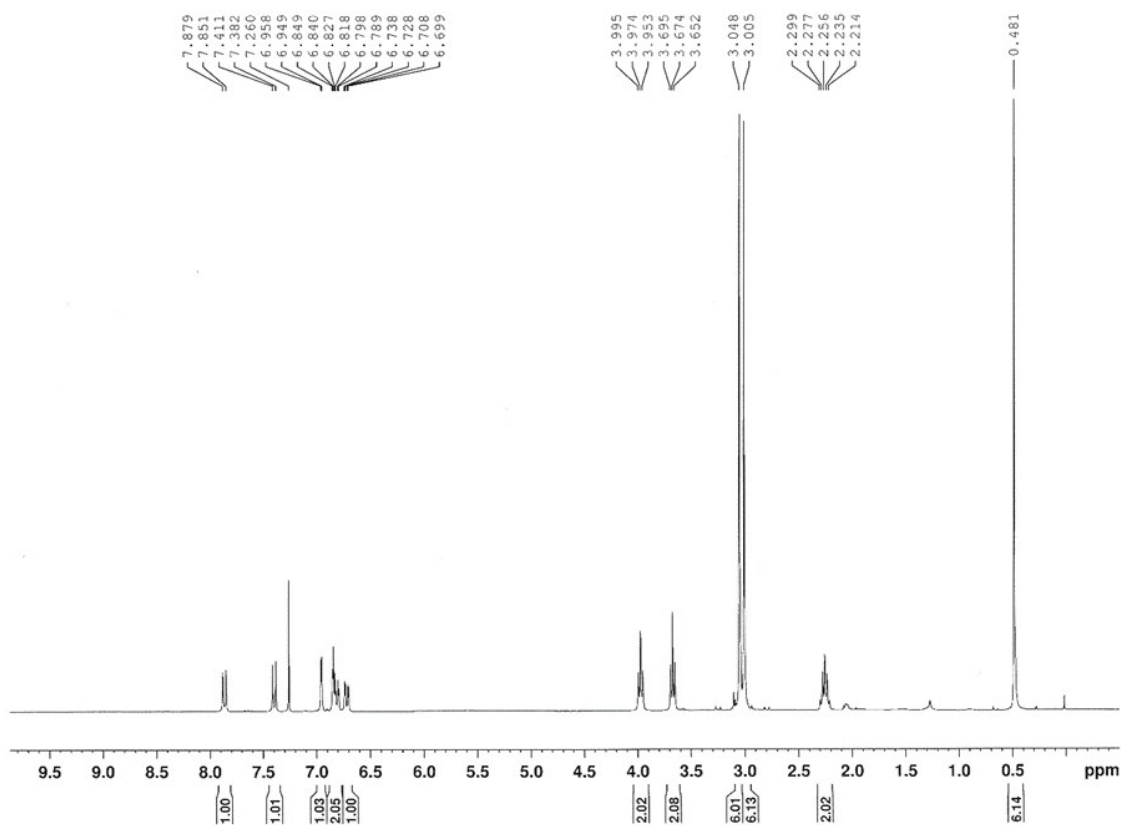

<sup>13</sup>C NMR (CDCl<sub>3</sub>, 75 MHz, 298 K) of ASiP<sup>a</sup> **8**

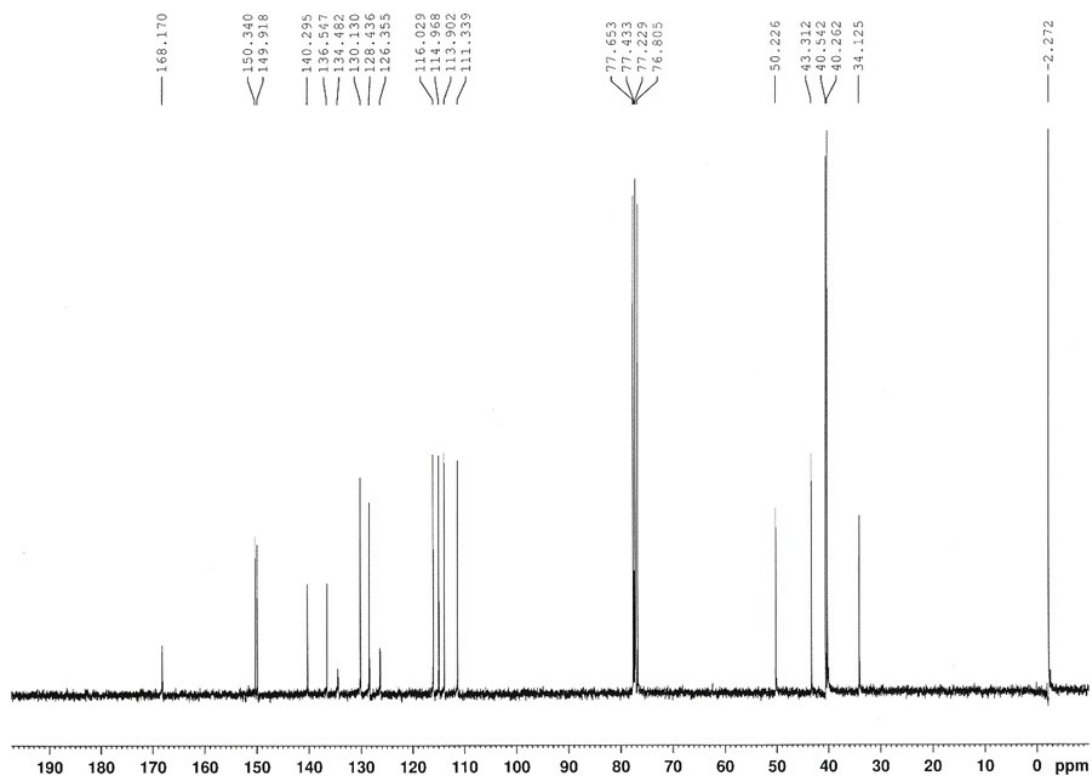

<sup>1</sup>H NMR (CDCl<sub>3</sub>, 300 Hz, 298 K) of ASiP<sup>a</sup> **9**

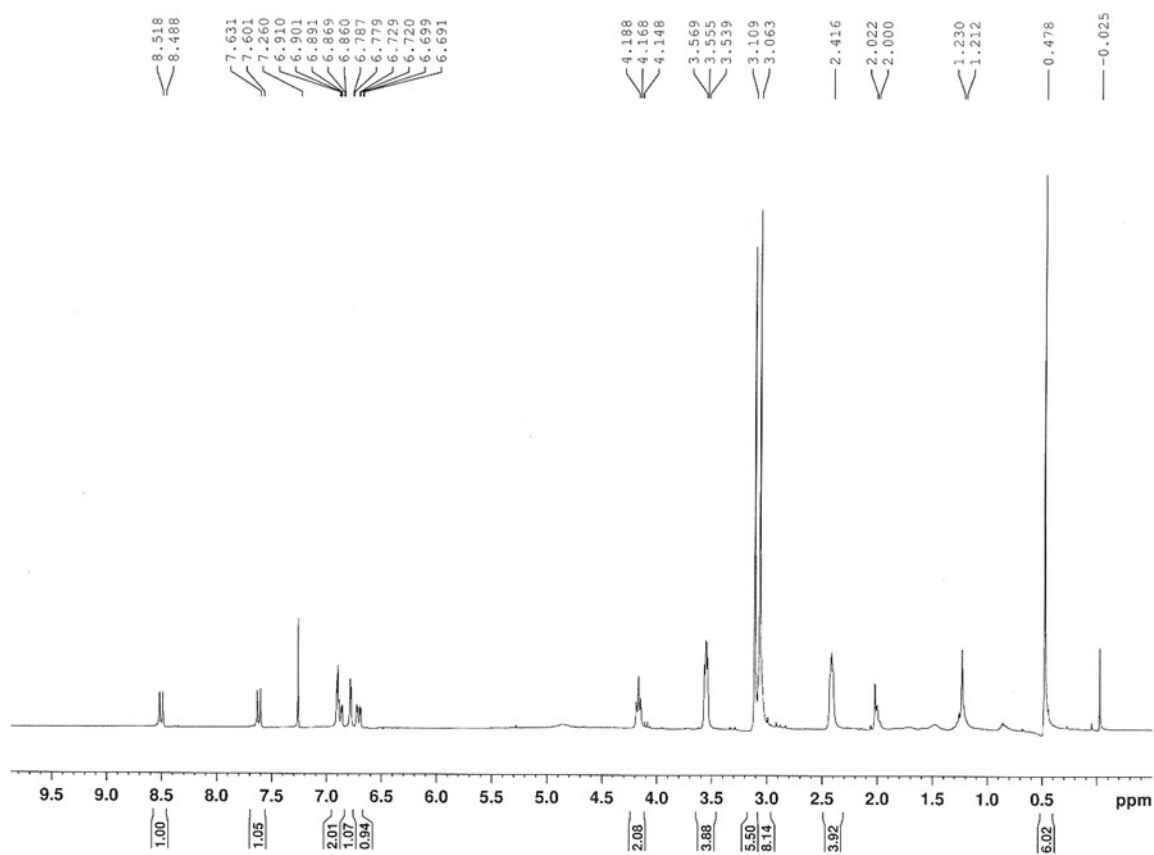

<sup>13</sup>C NMR (CDCl<sub>3</sub>, 125 MHz, 298 K) of ASiP<sup>a</sup> **9**

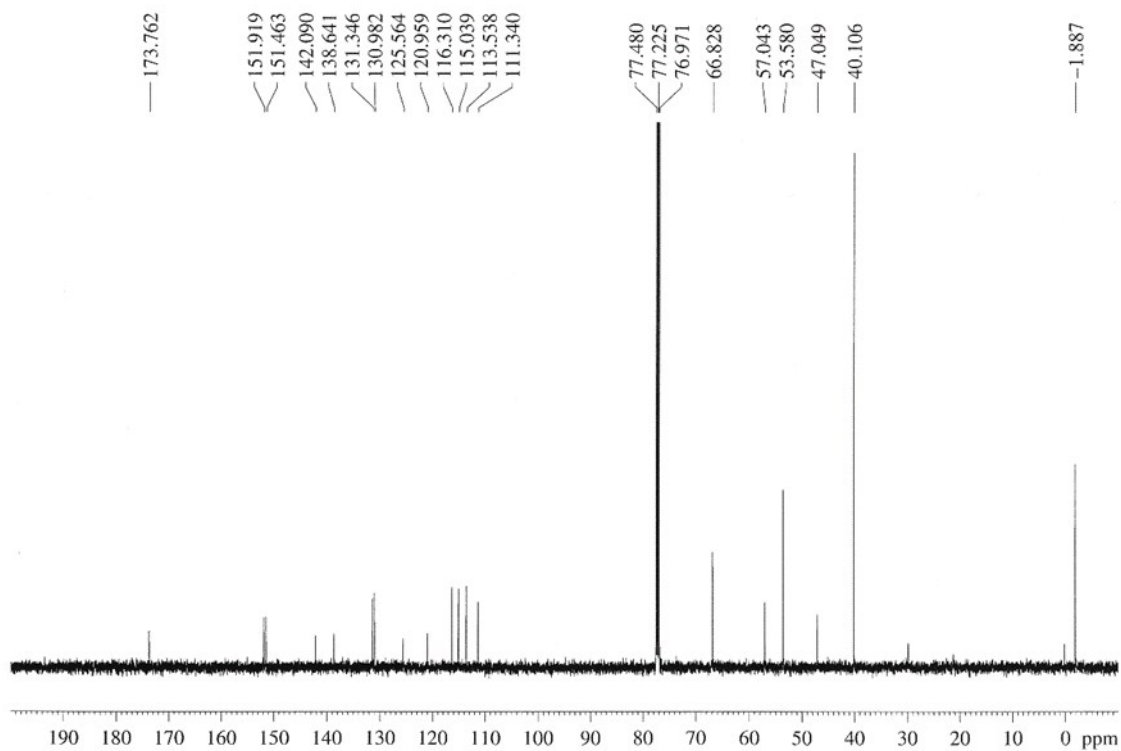

<sup>1</sup>H NMR (CDCl<sub>3</sub>, 500 Hz, 298 K) of ASiP<sup>a</sup> **10**

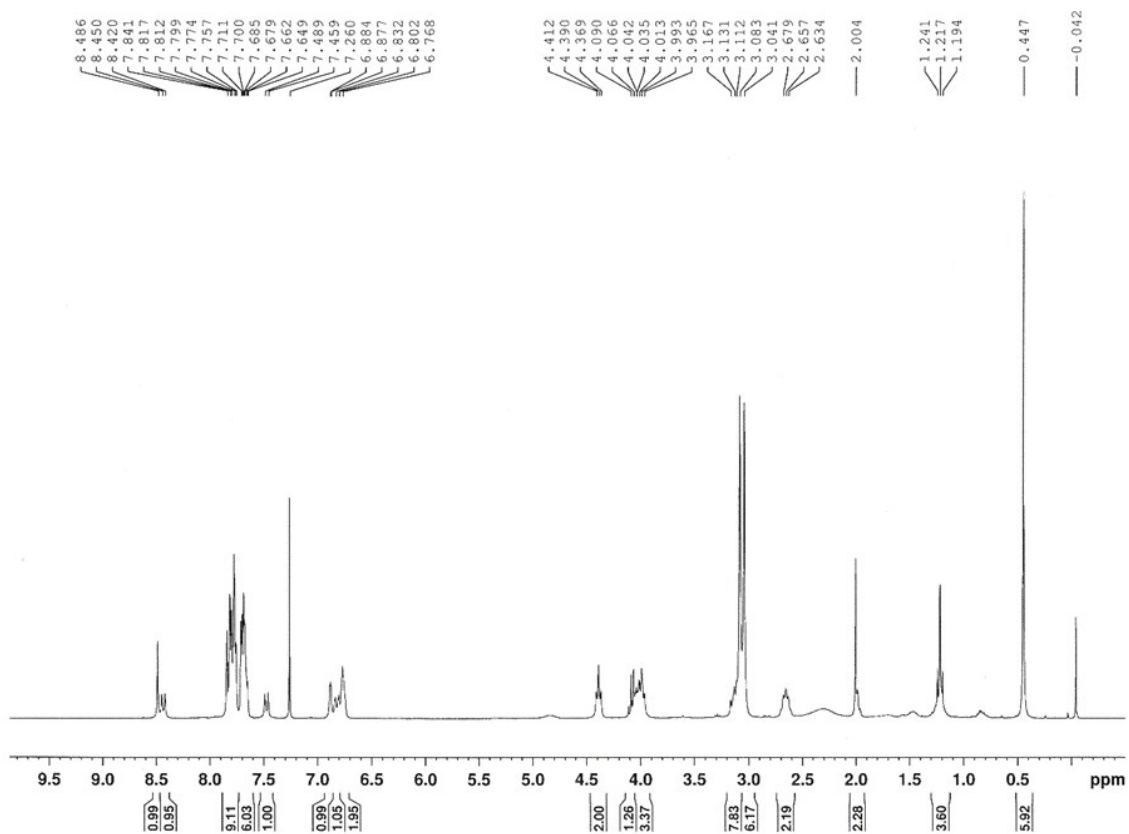

<sup>13</sup>C NMR (CDCl<sub>3</sub>, 125 MHz, 298 K) of ASiP<sup>a</sup> **10**

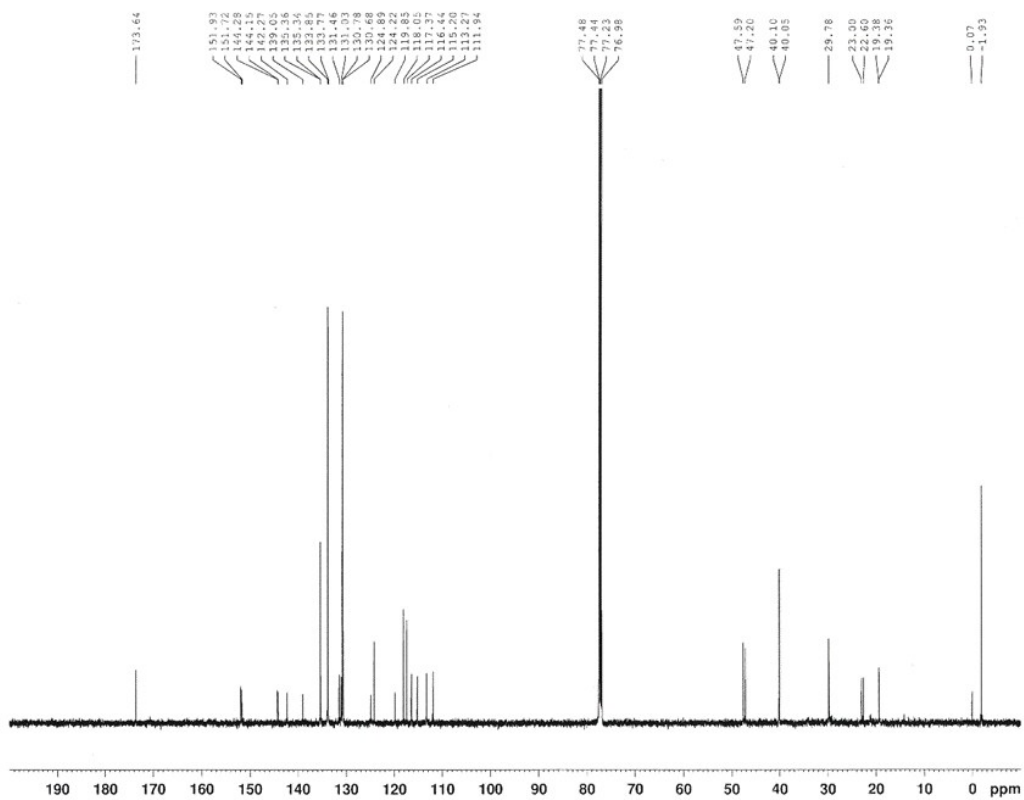

$^1\text{H}$  NMR ( $\text{CD}_3\text{CN}$ , 500 MHz, 298 K) of NIR-ASiP<sup>a</sup> 1

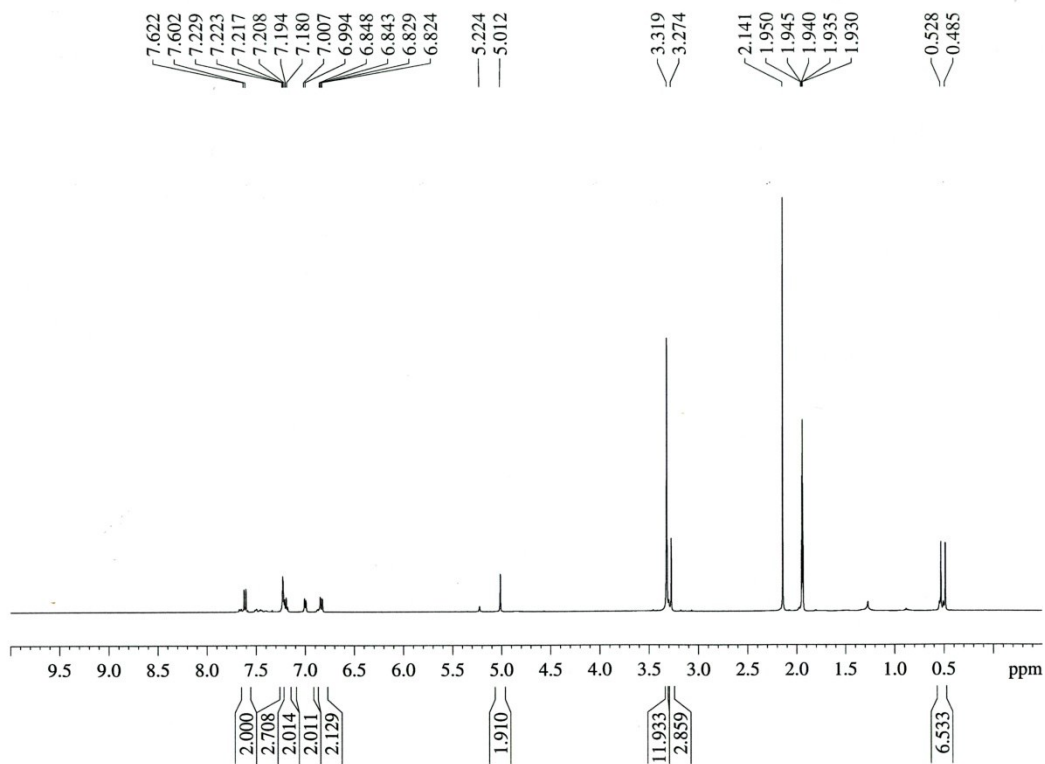

$^{13}\text{C}$  NMR ( $\text{CD}_3\text{OD}$ , 125 MHz, 298 K) of NIR-ASiP<sup>a</sup> 1

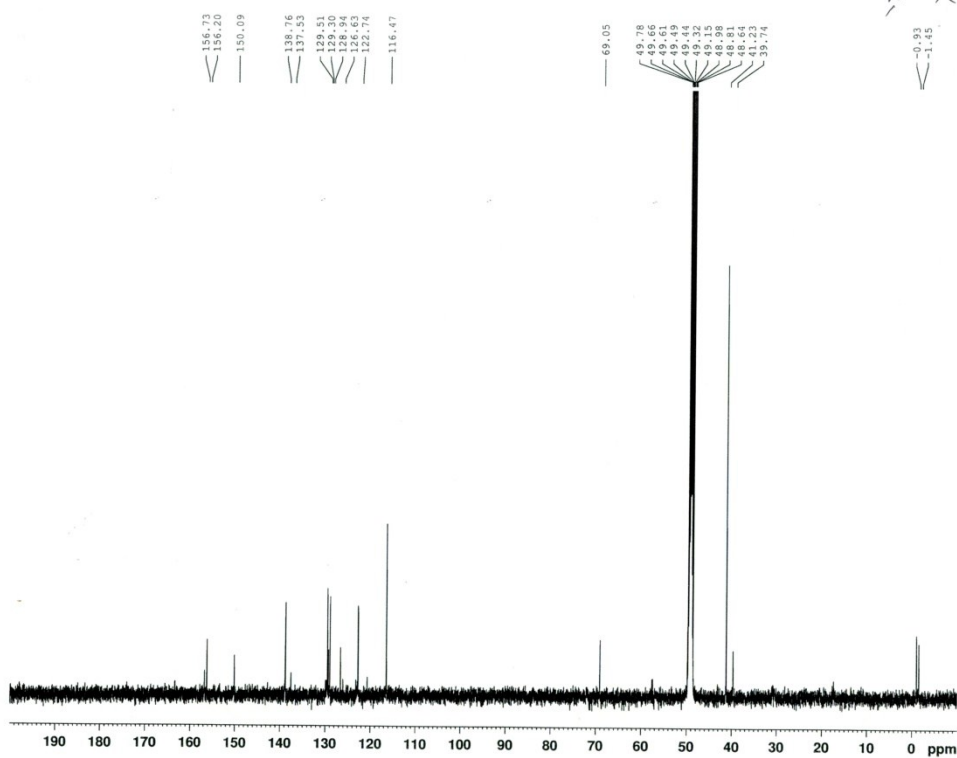

<sup>1</sup>H NMR (CD<sub>3</sub>OD, 500 MHz, 298 K) of NIR-ASiP<sup>a</sup> 2

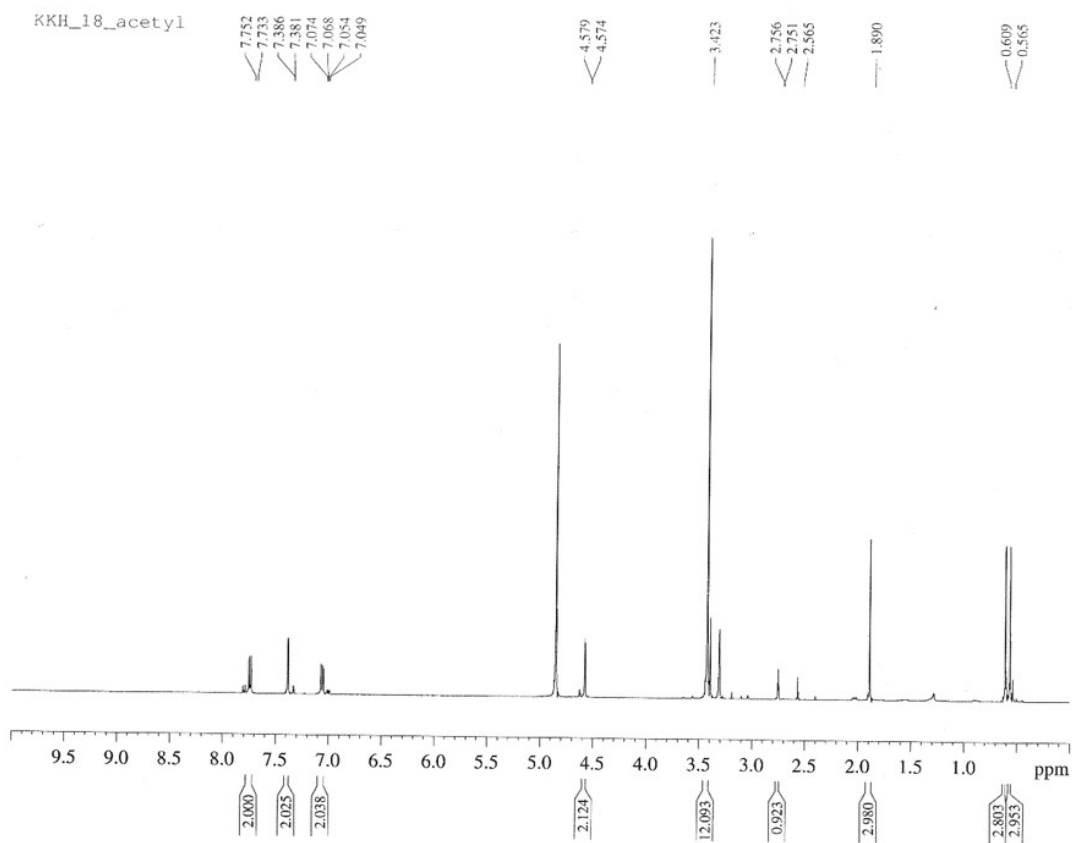

<sup>13</sup>C NMR (CD<sub>3</sub>OD, 125 MHz, 298 K) of NIR-ASiP<sup>a</sup> 2

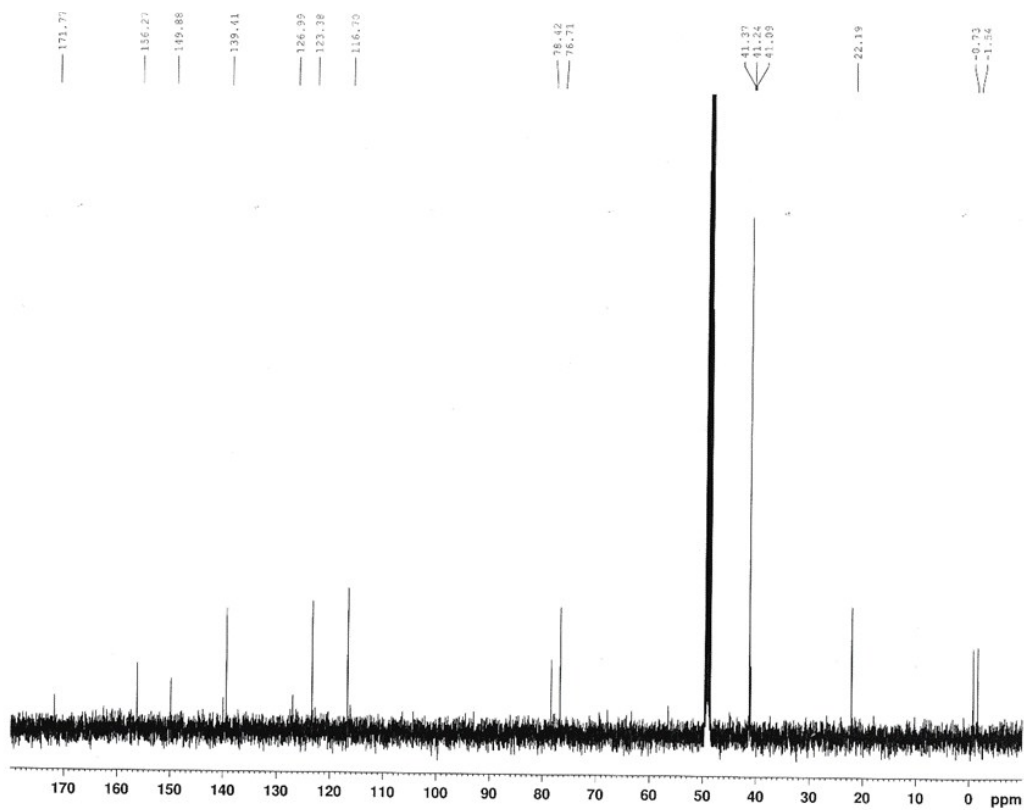

<sup>1</sup>H NMR (CD<sub>3</sub>OD, 500 MHz, 298 K) of NIR-ASiP<sup>a</sup> **3**

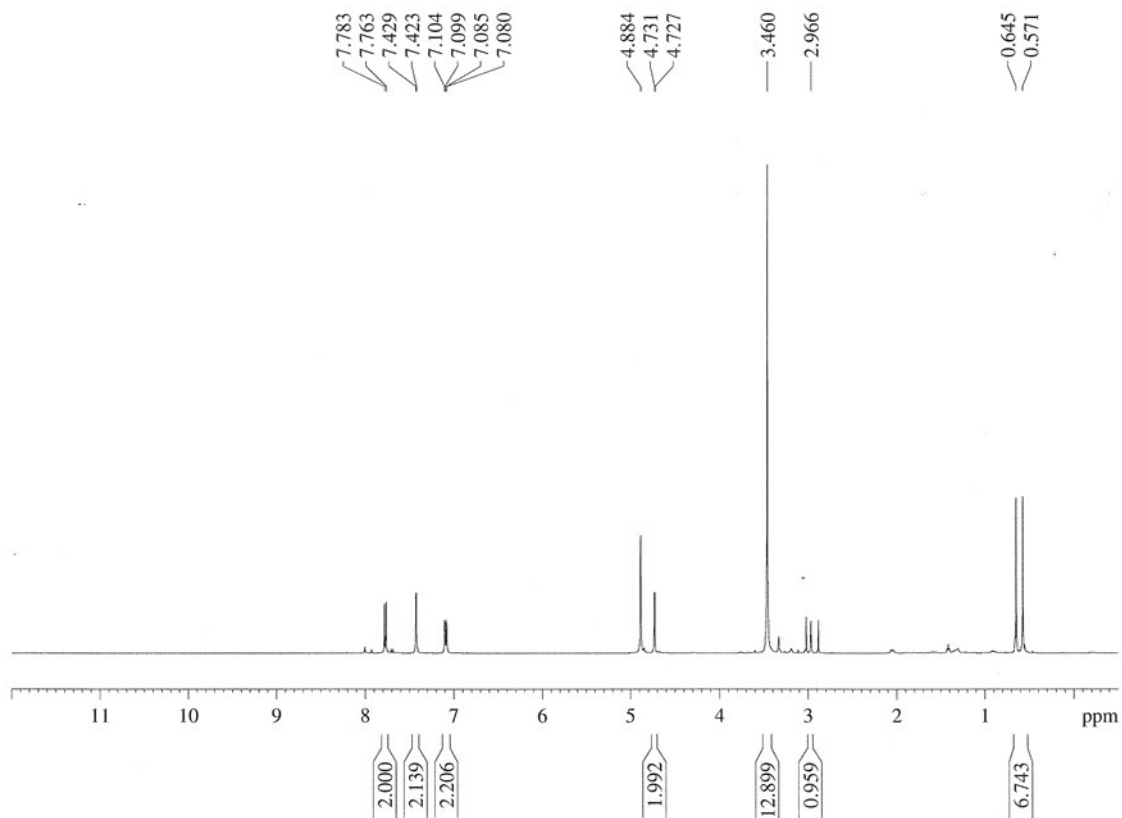

<sup>13</sup>C NMR (CD<sub>3</sub>OD, 125 MHz, 298 K) of NIR-ASiP<sup>a</sup> **3**

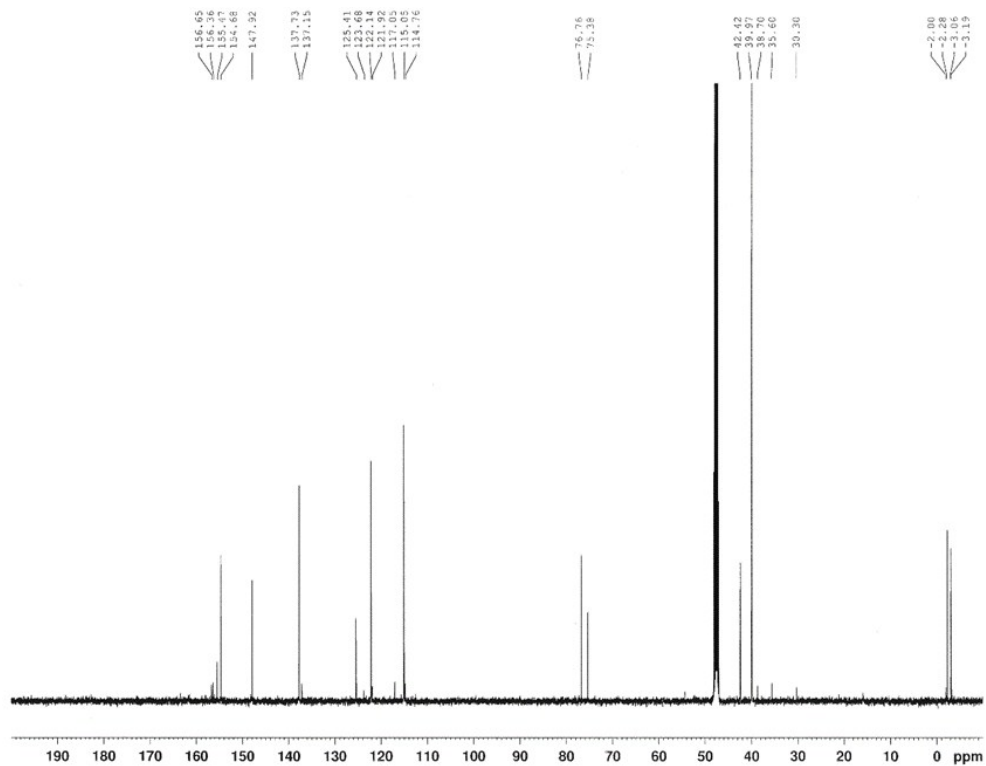



$^1\text{H}$  NMR ( $\text{CD}_3\text{OD}$ , 500 MHz, 298 K) of NIR-ASiP<sup>a</sup> 4

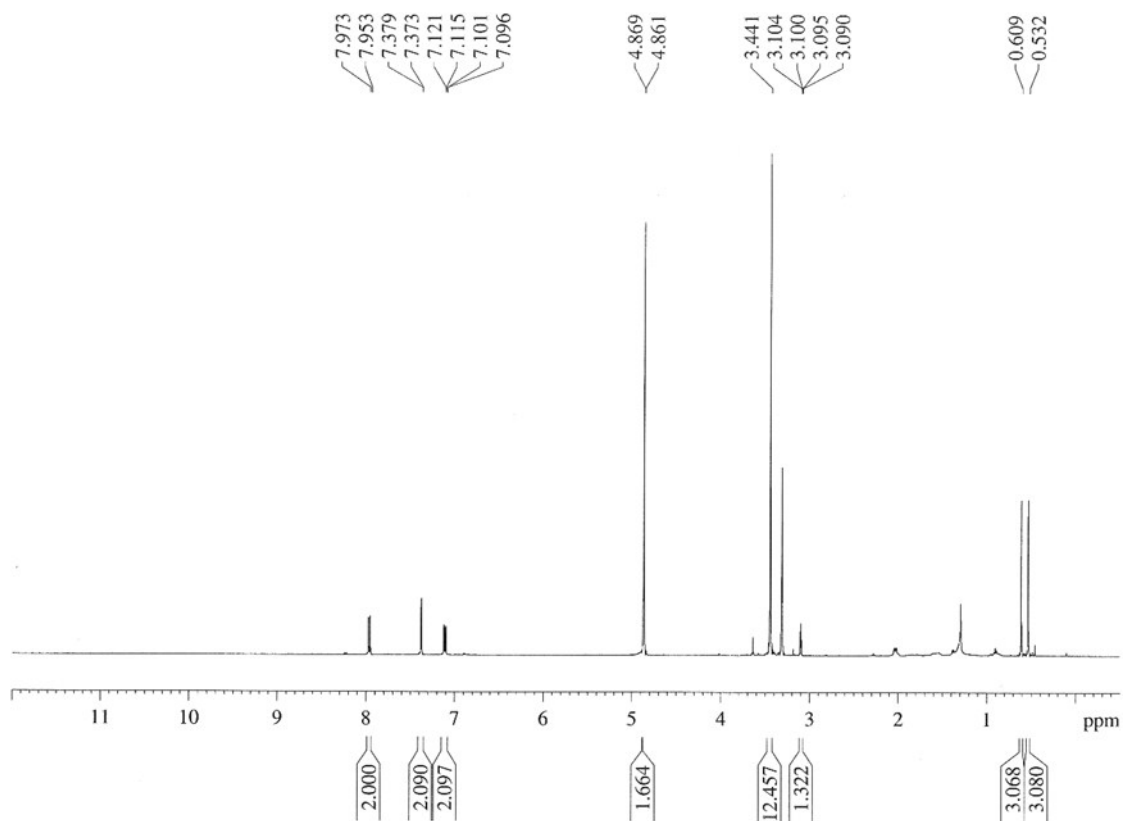

$^{13}\text{C}$  NMR ( $\text{CD}_3\text{OD}$ , 125 MHz, 298 K) of NIR-ASiP<sup>a</sup> 4

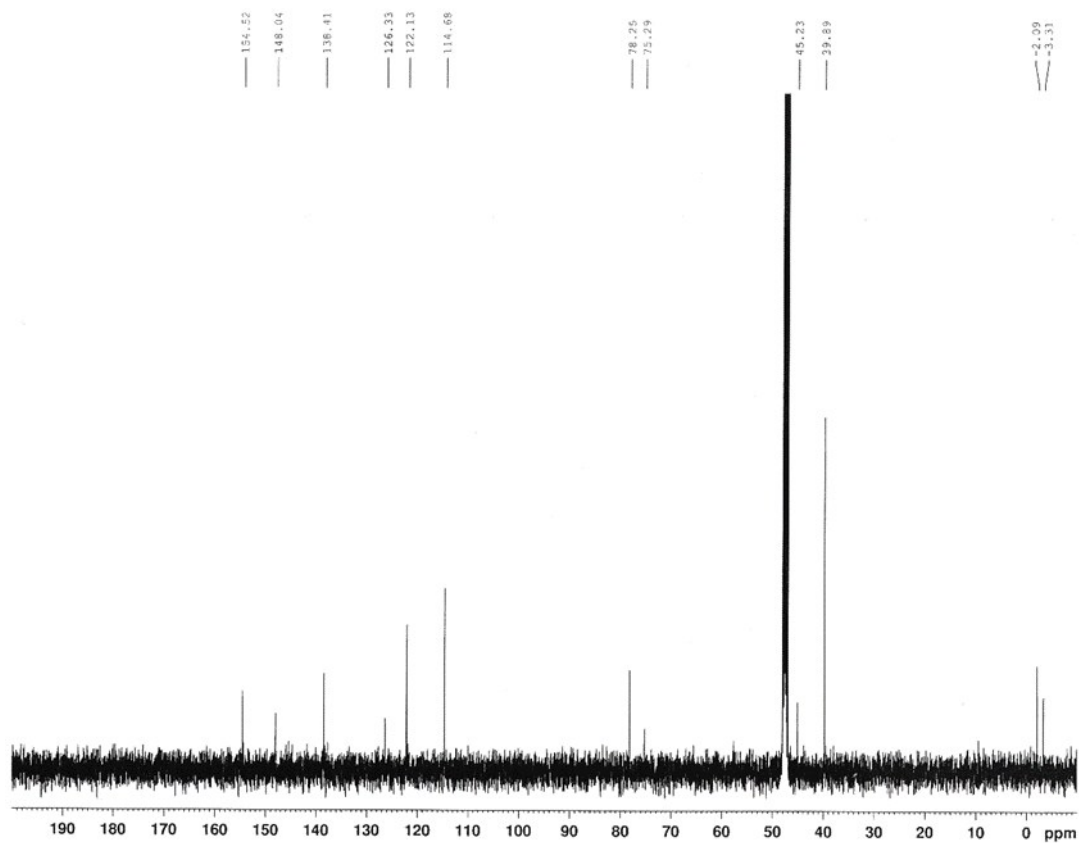

<sup>1</sup>H NMR (CD<sub>3</sub>OD, 500 MHz, 298 K) of NIR-ASiP<sup>a</sup> **5**

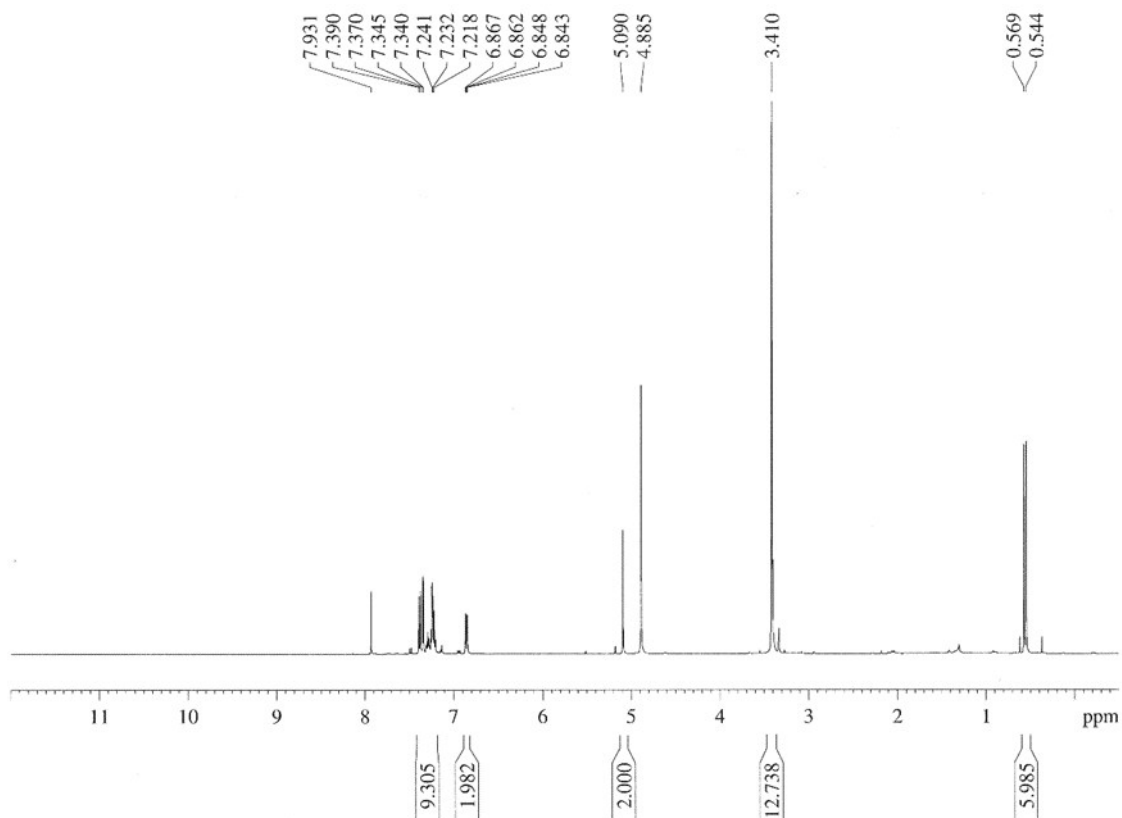

<sup>13</sup>C NMR (CD<sub>3</sub>OD, 125 MHz, 298 K) of NIR-ASiP<sup>a</sup> **5**

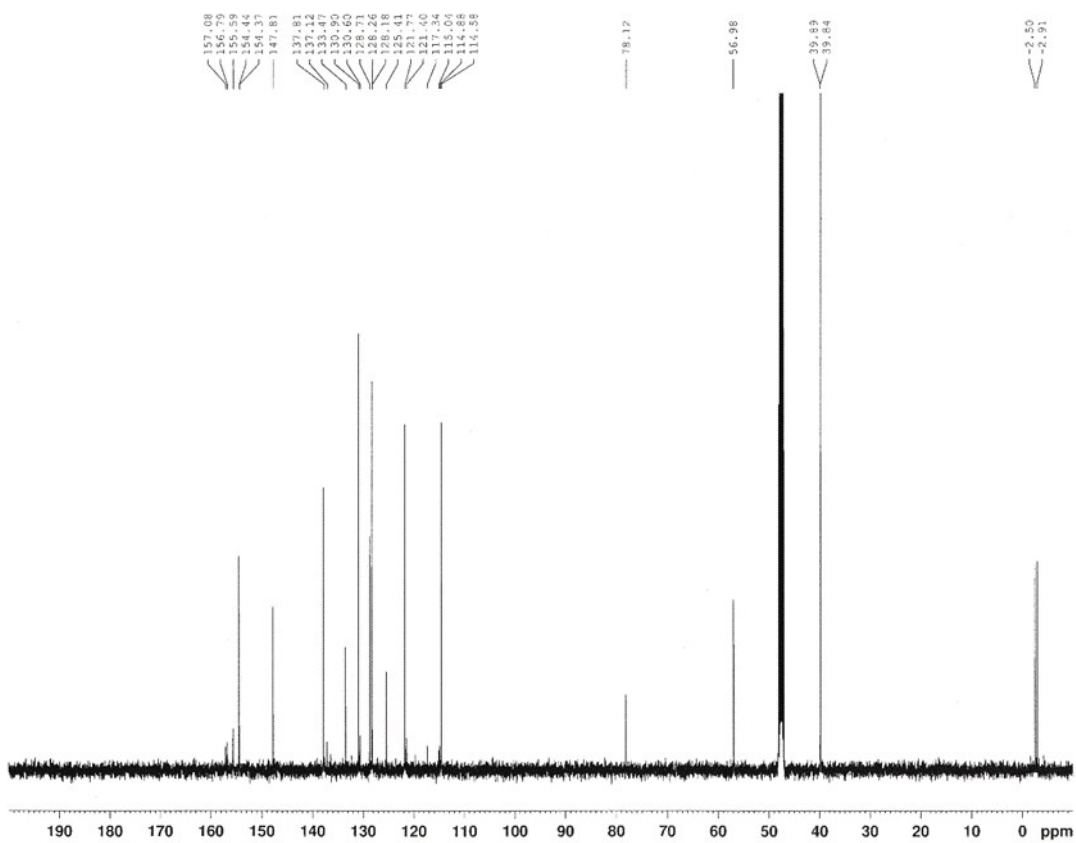

<sup>1</sup>H NMR (CD<sub>3</sub>OD, 500 MHz, 298 K) of NIR-ASiP<sup>a</sup> 6

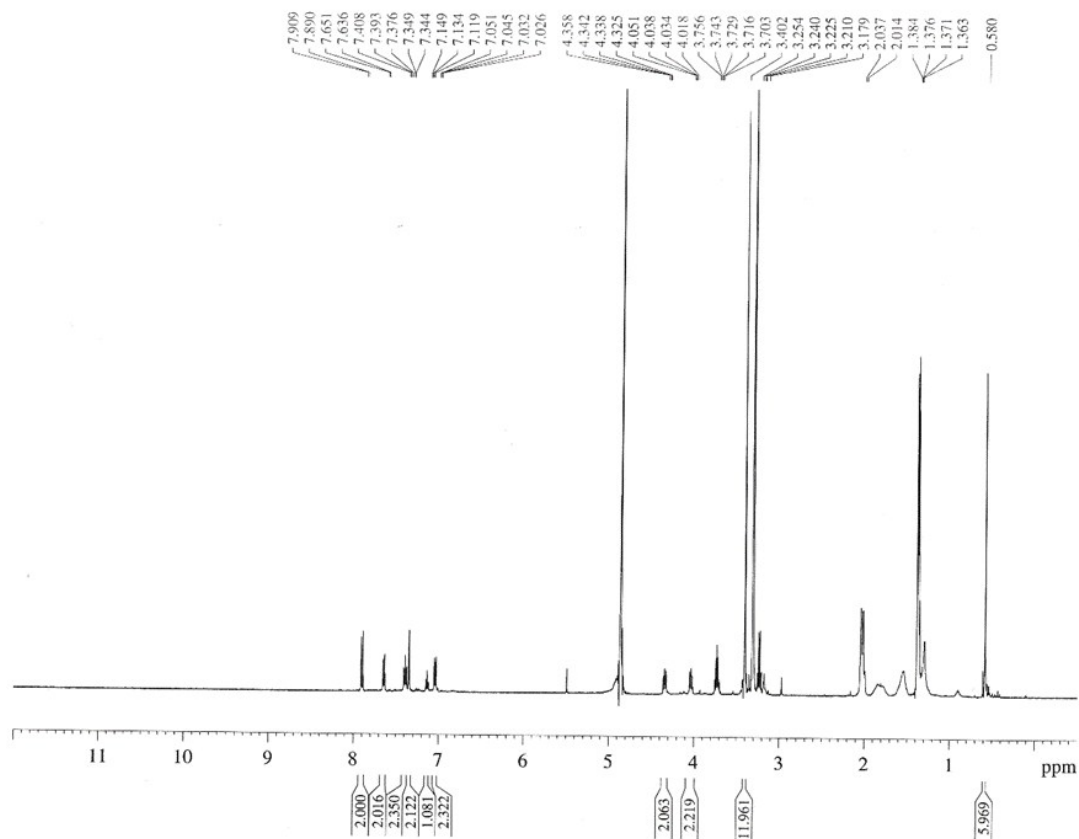

<sup>13</sup>C NMR (CD<sub>3</sub>OD, 125 MHz, 298 K) of NIR-ASiP<sup>a</sup> 6

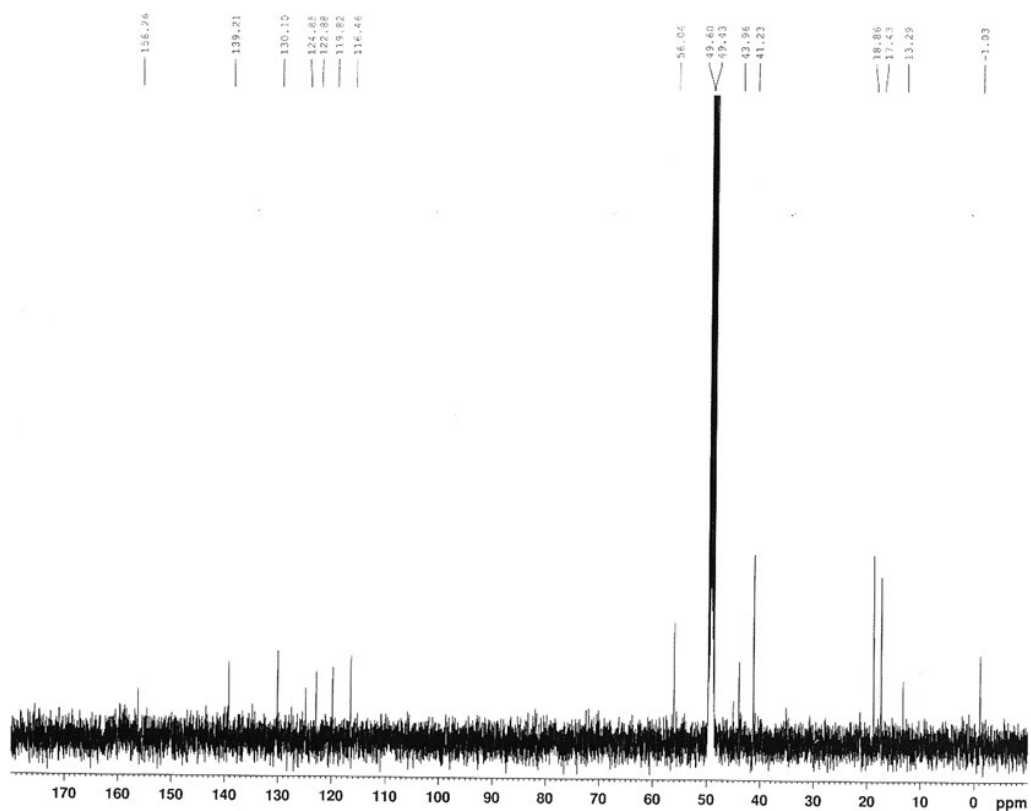

$^1\text{H}$  NMR ( $\text{CDCl}_3$ , 300 MHz, 298K) of the julolidine-derived Si-xanthone C

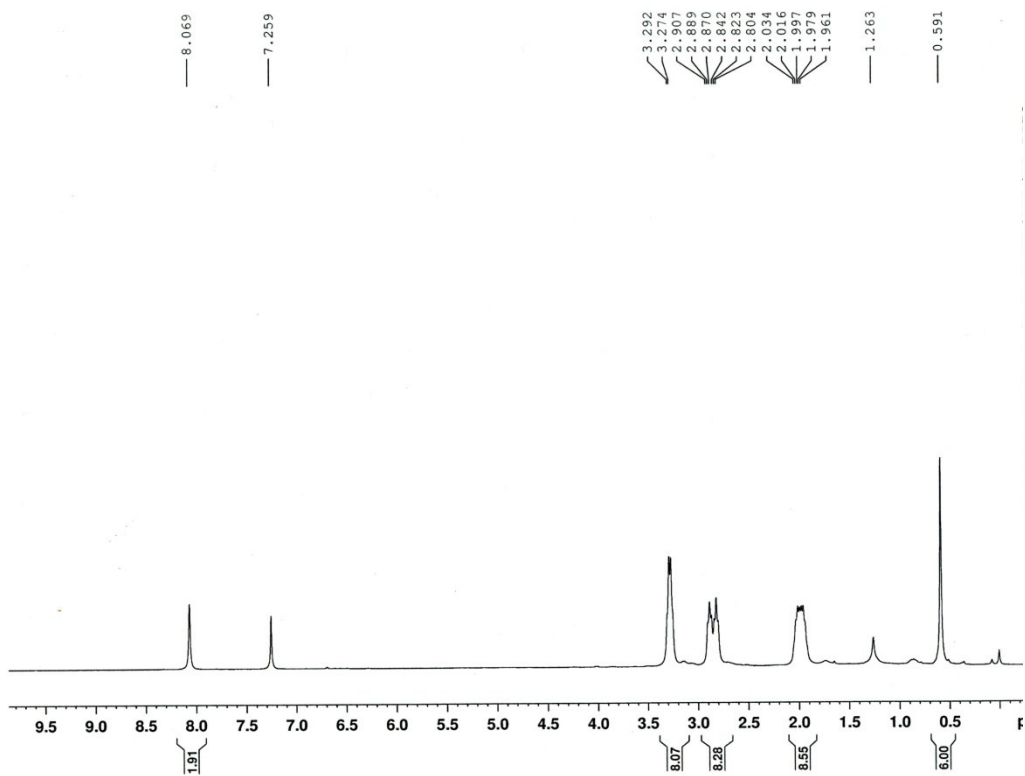

$^{13}\text{C}$  NMR ( $\text{CDCl}_3$ , 125 MHz, 298 K) of the julolidine-derived Si-xanthone C

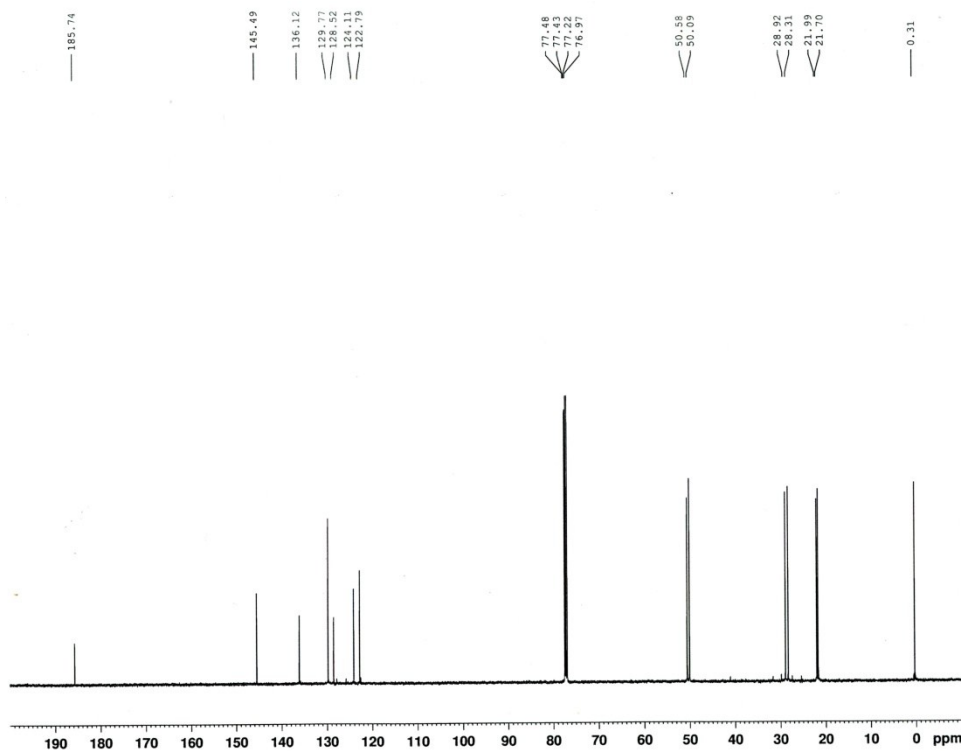

<sup>1</sup>H NMR (CDCl<sub>3</sub>, 500 MHz, 298K) of ASiP<sup>i</sup> 1

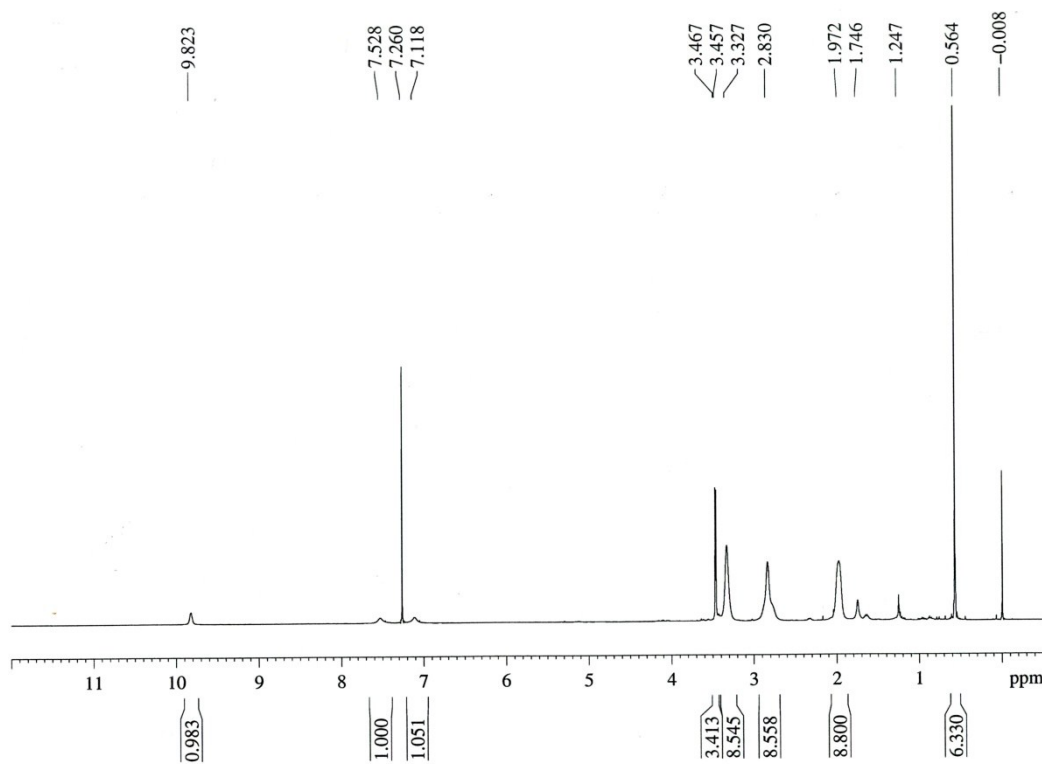

<sup>13</sup>C NMR (CDCl<sub>3</sub>, 125 MHz, 298 K) of ASiP<sup>i</sup> 1

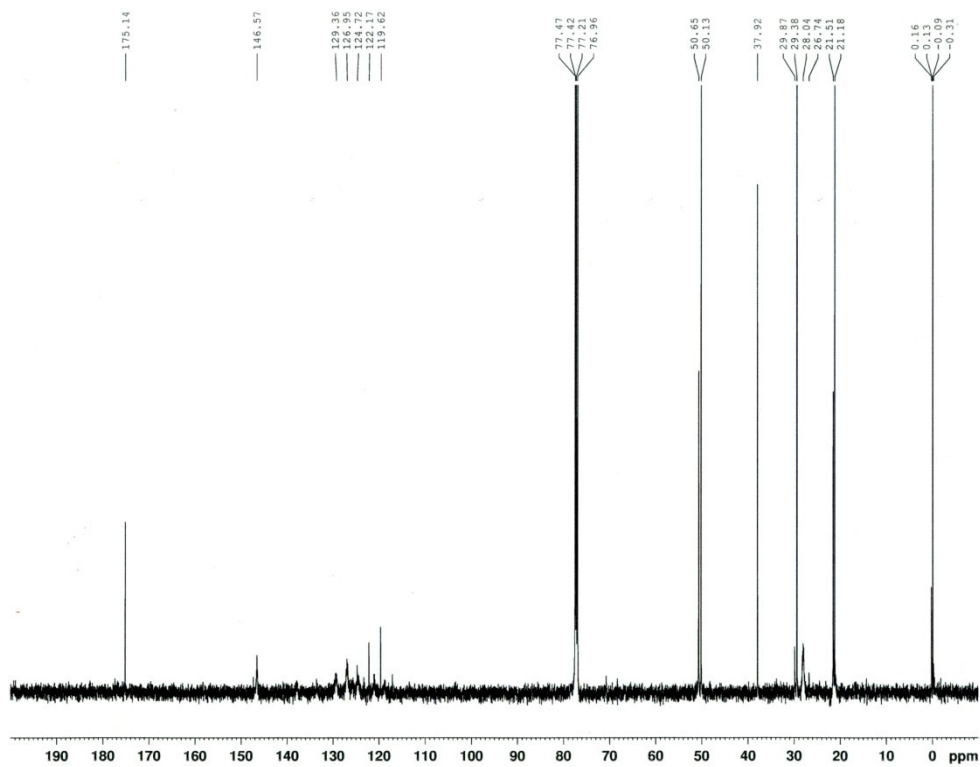

<sup>1</sup>H NMR (CDCl<sub>3</sub>, 500MHz, 298K) of ASiPj 2

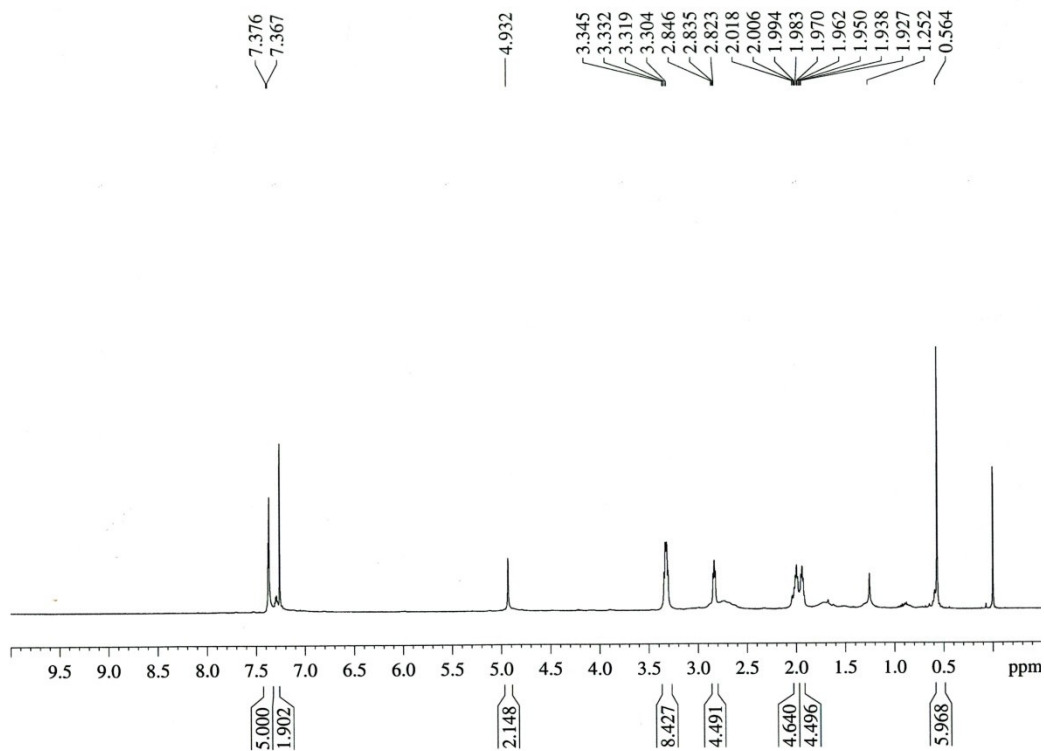

<sup>13</sup>C NMR (CDCl<sub>3</sub>, 75 MHz, 298 K) of ASiPj 2

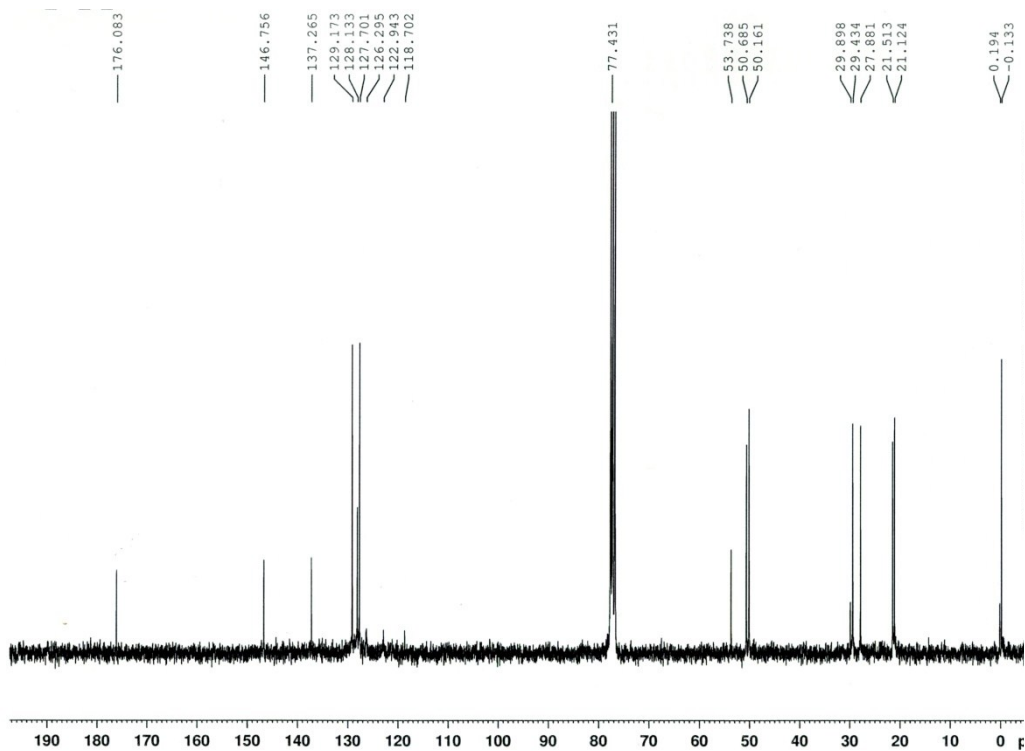

<sup>1</sup>H NMR (CDCl<sub>3</sub>, 300MHz, 298K) of ASiP' 3

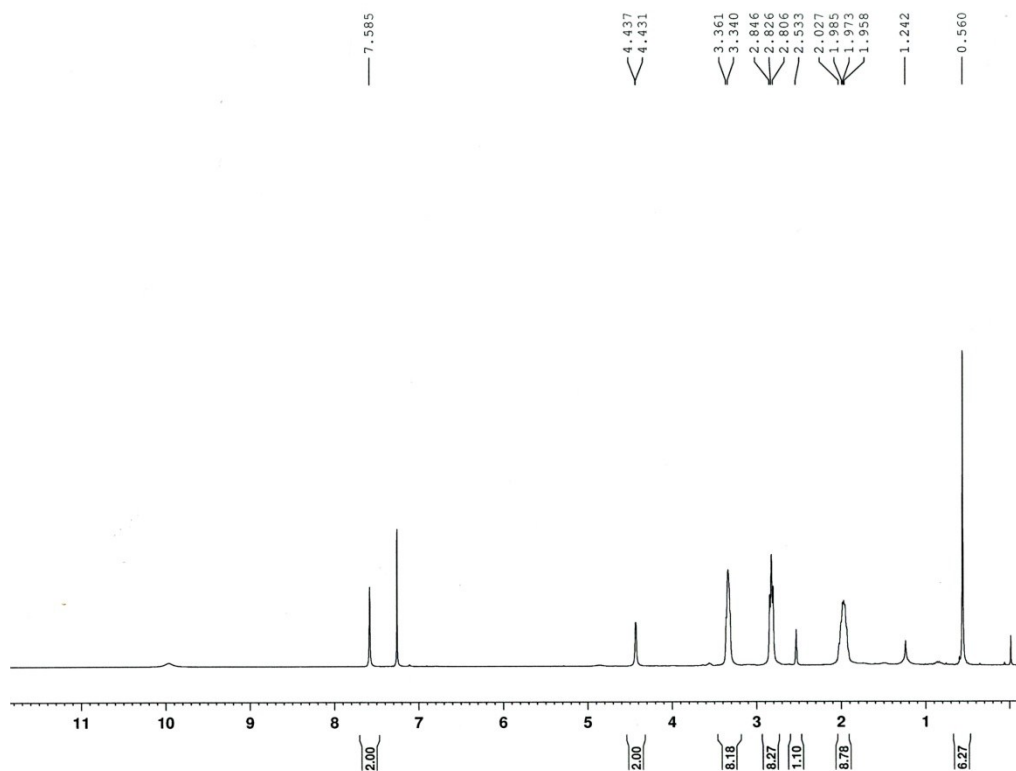

<sup>13</sup>C NMR (CDCl<sub>3</sub>, 125 MHz, 298 K) of ASiP' 3

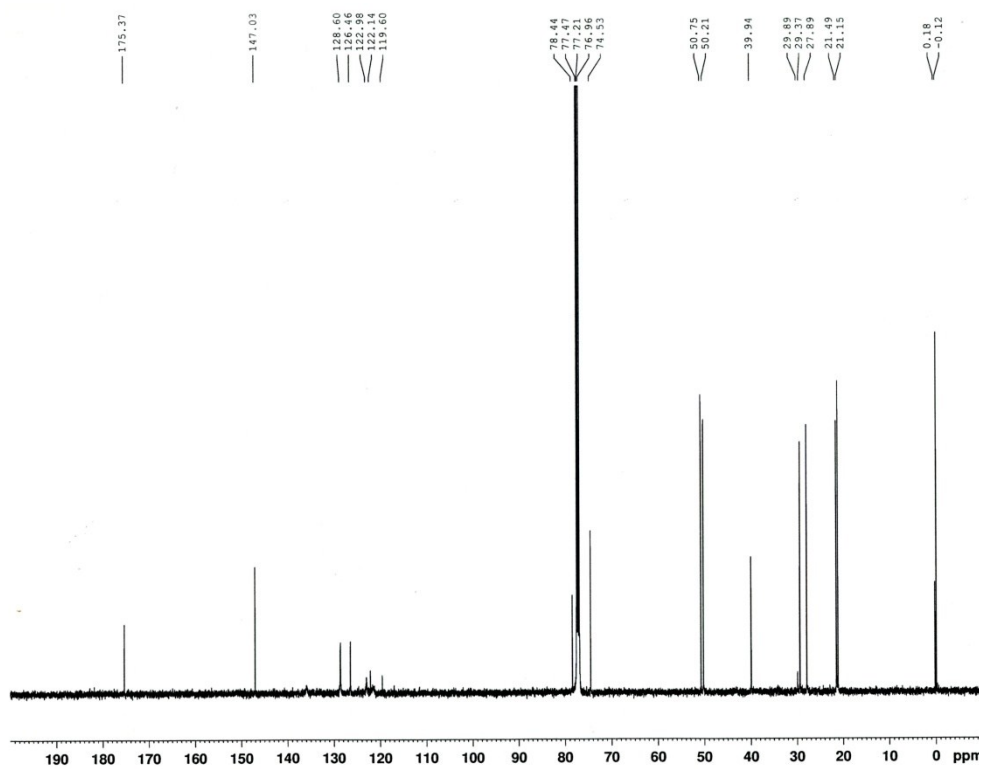

<sup>1</sup>H NMR (CD<sub>3</sub>OD, 500 MHz, 298 K) of NIR-ASiPj 1

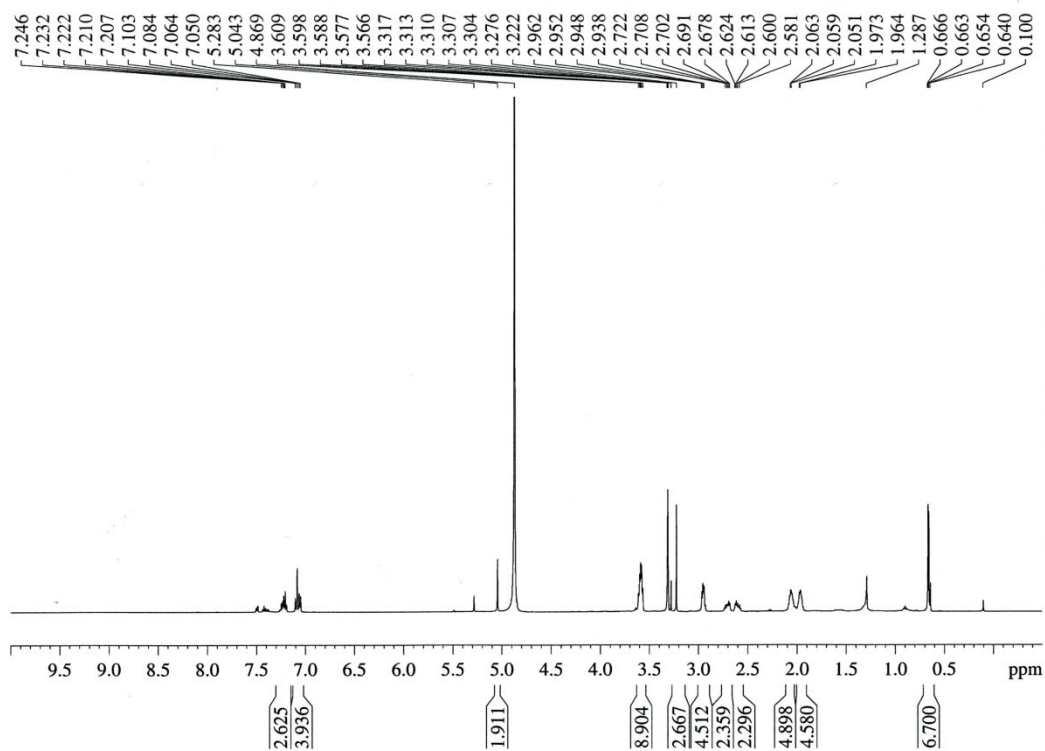

<sup>13</sup>C NMR (CD<sub>3</sub>OD, 125 MHz, 298 K) of NIR-ASiPj 1

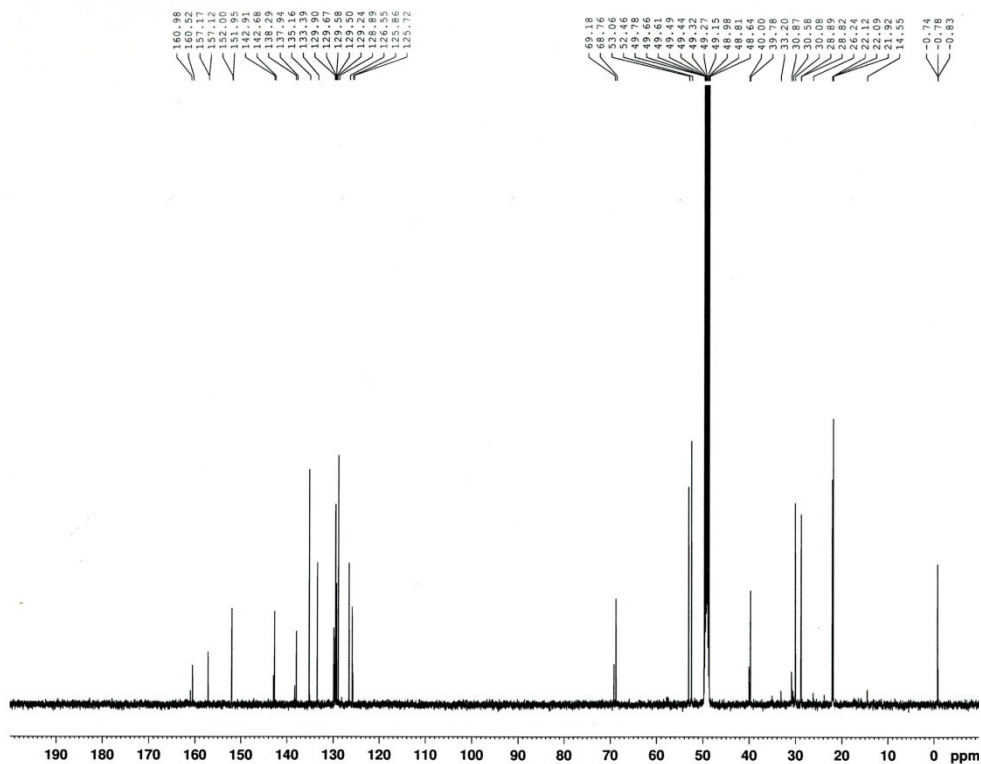



<sup>1</sup>H NMR (CD<sub>3</sub>OD, 500 MHz, 298 K) of NIR-ASiPj 2

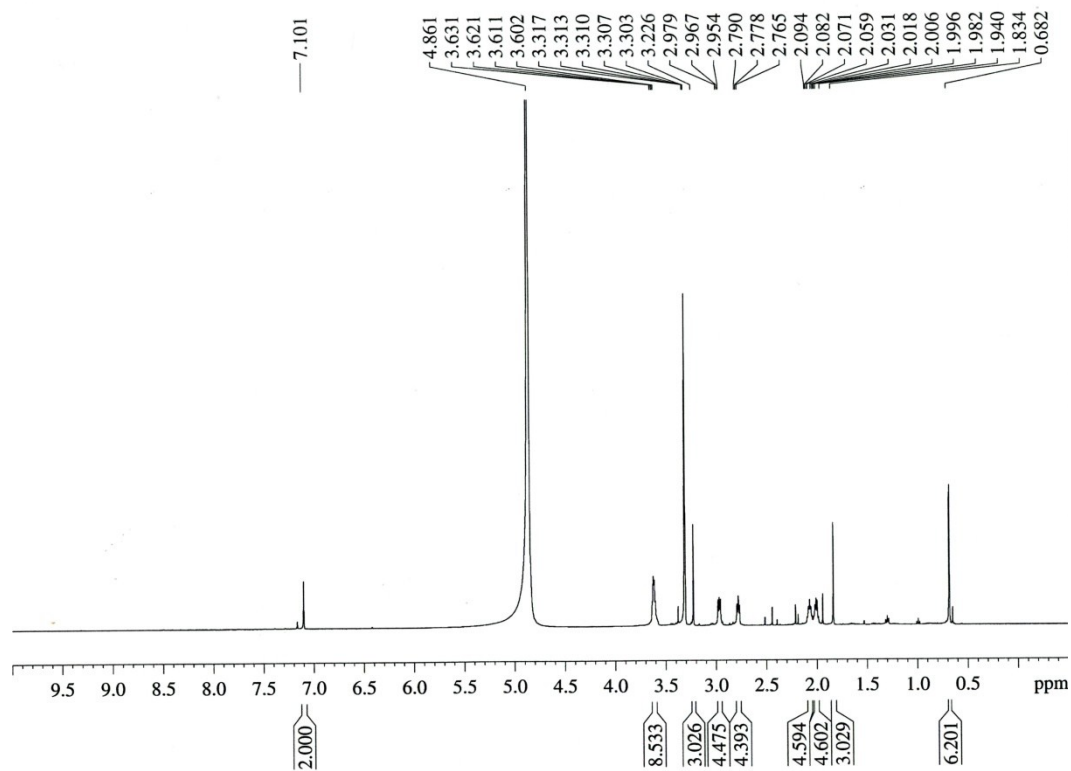

<sup>13</sup>C NMR (CD<sub>3</sub>OD, 125 MHz, 298 K) of NIR-ASiPj 2

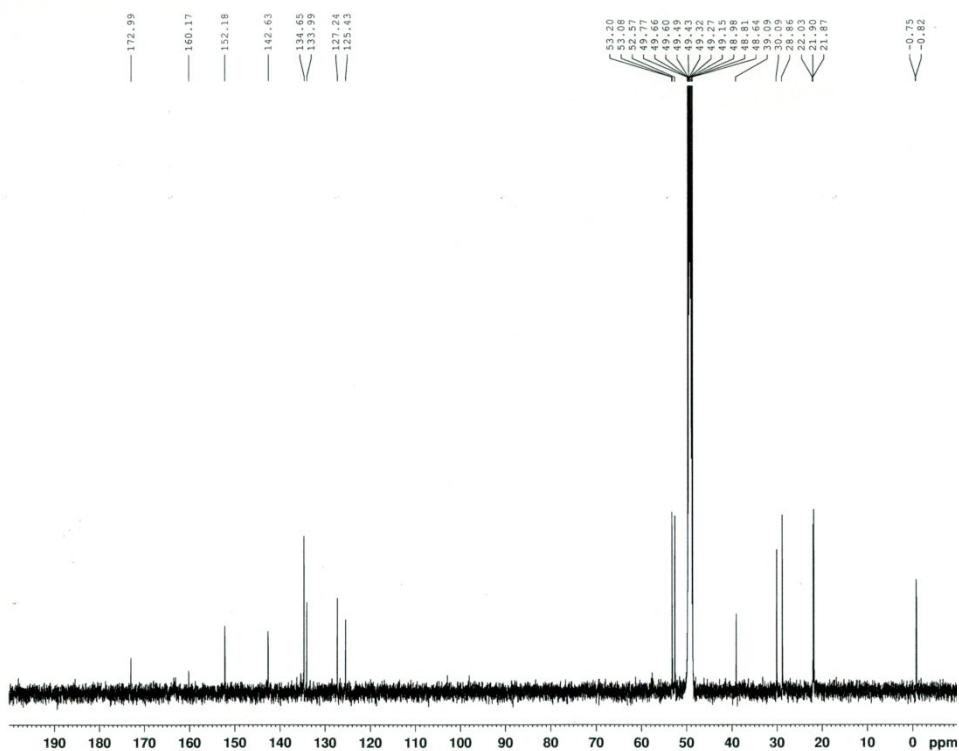

$^1\text{H}$  NMR ( $\text{CD}_3\text{OD}$ , 500 MHz, 298 K) of NIR-ASiP' **3**

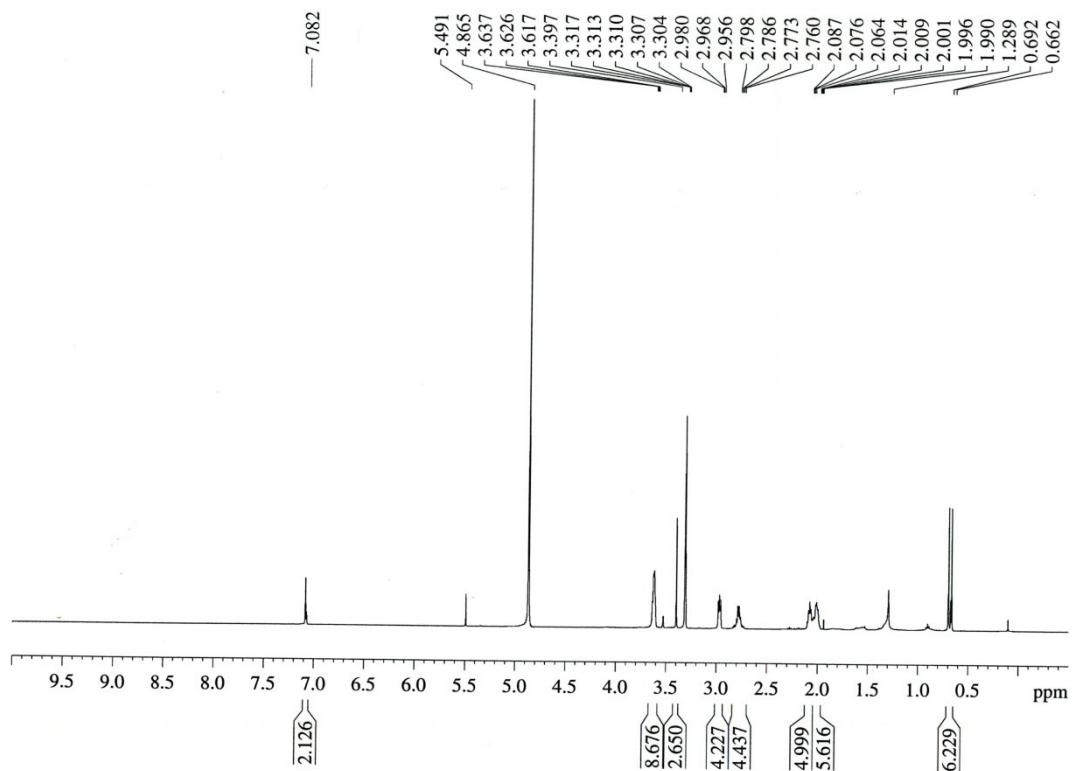

$^{13}\text{C}$  NMR ( $\text{CD}_3\text{OD}$ , 125 MHz, 298 K) of NIR-ASiP' **3**

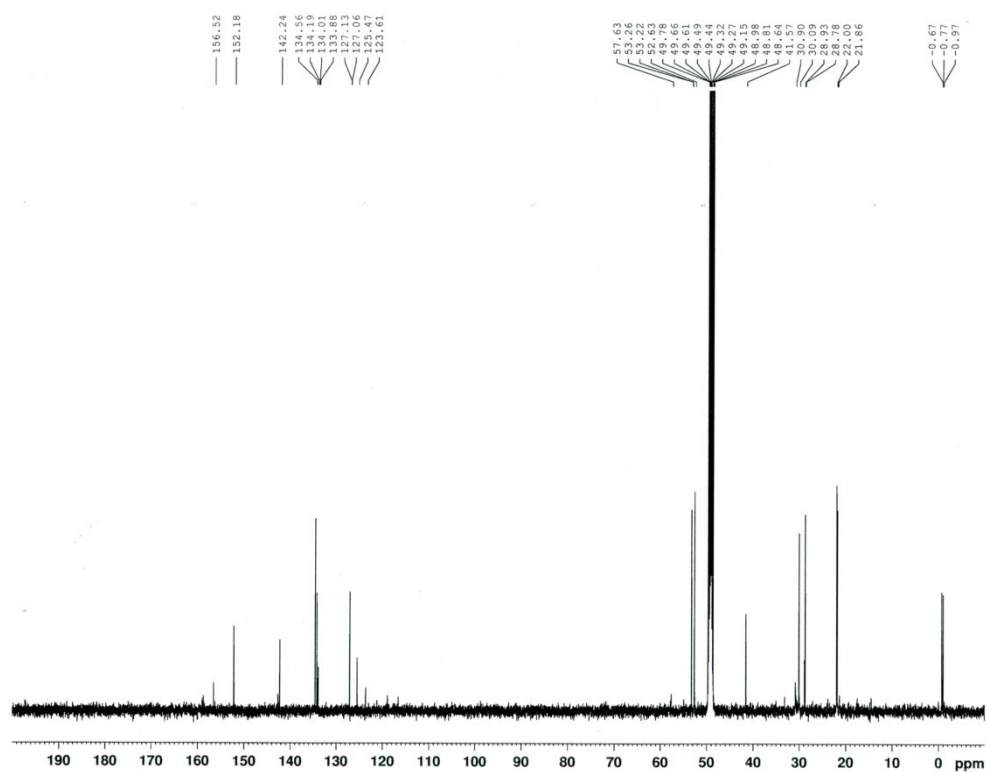

$^1\text{H NMR}$  ( $\text{CDCl}_3$ , 500 MHz, 298 K) of  $\text{ASiP}^i\text{-H}_2\text{O}_2$

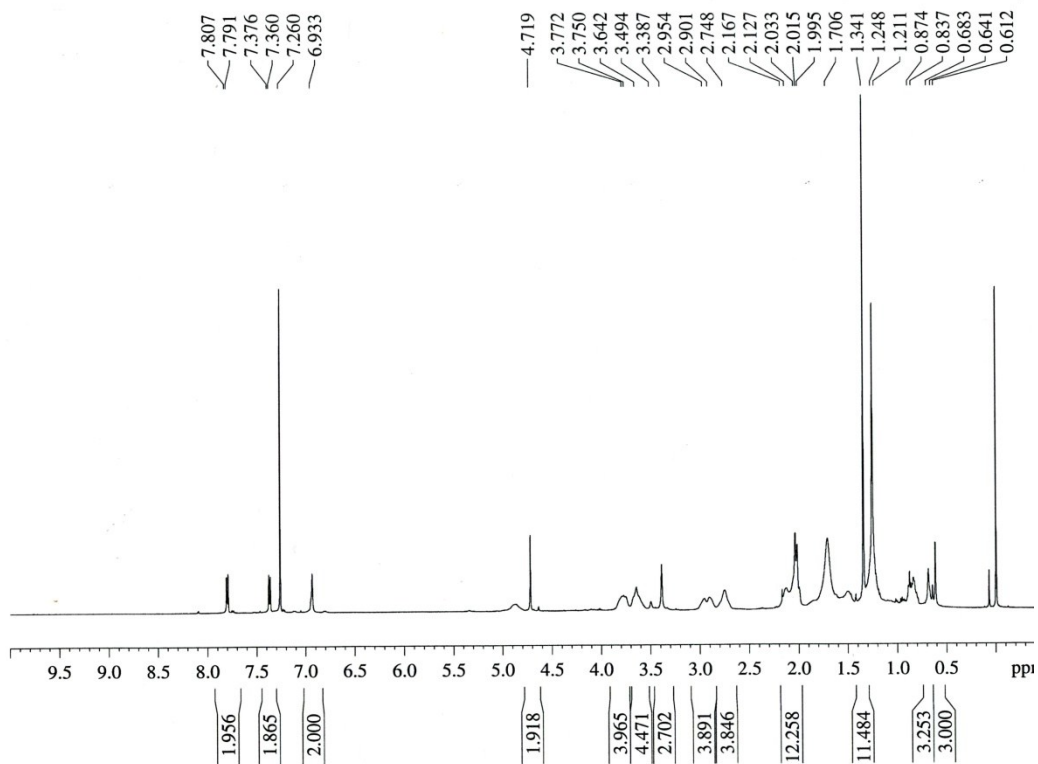

$^{13}\text{C NMR}$  ( $\text{CDCl}_3$ , 125 MHz, 298 K) of  $\text{ASiP}^i\text{-H}_2\text{O}_2$

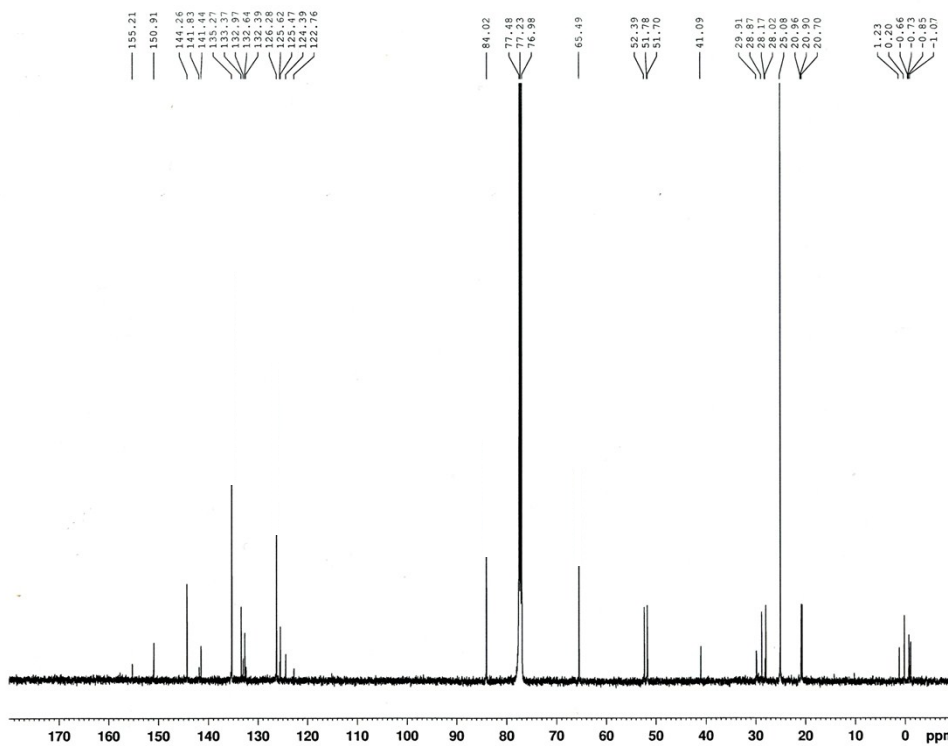

# HR Mass-Spectra (ESI<sup>+</sup>) for key dyes selected

## HRMS (ESI<sup>+</sup>) of ASiP<sup>a</sup> 1

[ Theoretical Ion Distribution ]

Molecular Formula : C<sub>20</sub> H<sub>28</sub> N<sub>3</sub> Si

(m/z 338.2053, MW 338.5479, U.S. 9.5)

Base Peak : 338.2053, Averaged MW : 338.5455 (a), 338.5467 (w)

| m/z      | INT.          |
|----------|---------------|
| 338.2053 | 100.0000***** |
| 339.2077 | 28.4102*****  |
| 340.2064 | 7.1429****    |
| 341.2074 | 1.1000*       |
| 342.2095 | 0.1059        |
| 343.2120 | 0.0070        |
| 344.2148 | 0.0003        |

Data : 1-C20H28N3Si-HRFAB Date : 17-Aug-2018 09:14

Instrument : MStation

Sample : -

Note : -

Inlet : Direct Ion Mode : FAB+

RT : 0.45 min Scan# : (10,11)

Elements : C 20/0, H 28/0, N 3/0, Si 1/0

Mass Tolerance : 3mmu

Unsaturation (U.S.) : -0.5 - 100.0

| Observed m/z | Int%   | Err [ppm / mmu] | U.S. Composition                                      |
|--------------|--------|-----------------|-------------------------------------------------------|
| 1 338.2055   | 100.00 | +0.7 / +0.2     | 9.5 C <sub>20</sub> H <sub>28</sub> N <sub>3</sub> Si |
| 339.2068     | 29.17  |                 |                                                       |

[ Mass Spectrum ]

Data : 1-C20H28N3Si-HRFAB Date : 17-Aug-2018 09:14

Instrument : MStation

Sample : -

Inlet : Direct Ion Mode : FAB+

Spectrum Type : Normal Ion [EF-Linear]

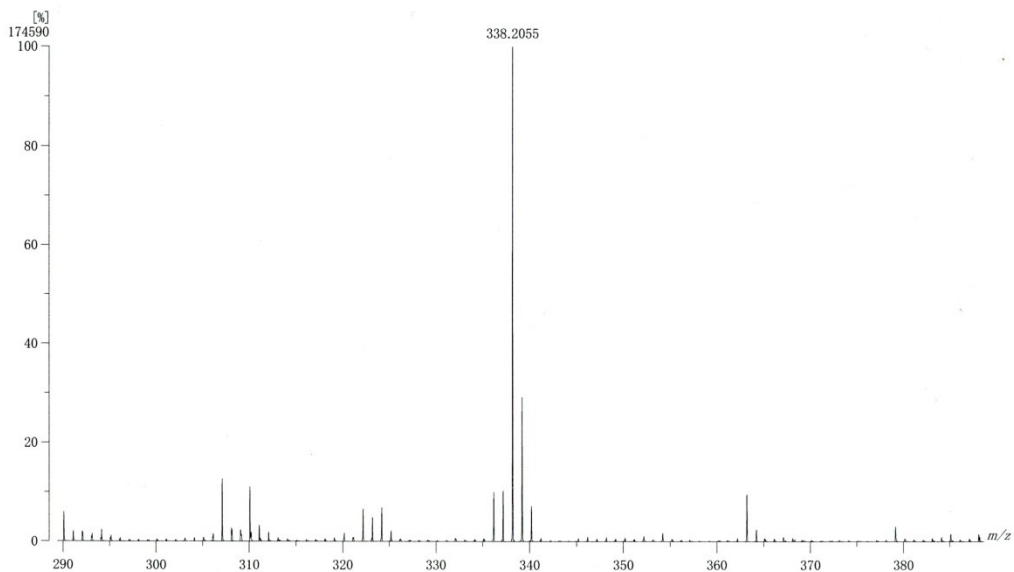

# HRMS (ESI+) of ASiP<sup>a</sup> 2

[ Theoretical Ion Distribution ]  
Molecular Formula : C<sub>26</sub> H<sub>32</sub> N<sub>3</sub> Si

(m/z 414.2366, MW 414.6457, U.S. 13.5)

Base Peak : 414.2366, Averaged MW : 414.6430(a), 414.6441(w)

| m/z      | INT.          |
|----------|---------------|
| 414.2366 | 100.0000***** |
| 415.2392 | 35.0836*****  |
| 416.2388 | 9.2244*****   |
| 417.2396 | 1.6322*       |
| 418.2415 | 0.1934        |
| 419.2440 | 0.0163        |
| 420.2467 | 0.0010        |

Data : 2-C26H32N3Si-HRFAB Date : 17-Aug-2018 09:18

Instrument : MStation

Sample : -

Note : -

Inlet : Direct Ion Mode : FAB+

RT : 0.15 min Scan# : (45)

Elements : C 26/0, H 32/0, N 3/0, Si 1/0

Mass Tolerance : 3mmu

Unsaturation (U.S.) : -0.5 - 1000

| Observed m/z | Int%   | Err [ppm / mmu] | U.S. Composition                                       |
|--------------|--------|-----------------|--------------------------------------------------------|
| 1 412.2207   | 10.38  | -0.5 / -0.2     | 14.5 C <sub>26</sub> H <sub>30</sub> N <sub>3</sub> Si |
| 2 414.2362   | 100.00 | -0.8 / -0.4     | 13.5 C <sub>26</sub> H <sub>32</sub> N <sub>3</sub> Si |
| 415.2403     | 34.69  |                 |                                                        |

[ Mass Spectrum ]

Data : 2-C26H32N3Si-HRFAB Date : 17-Aug-2018 09:18

Instrument : MStation

Sample : -

Inlet : Direct Ion Mode : FAB+

Spectrum Type : Normal Ion [EF-Linear]

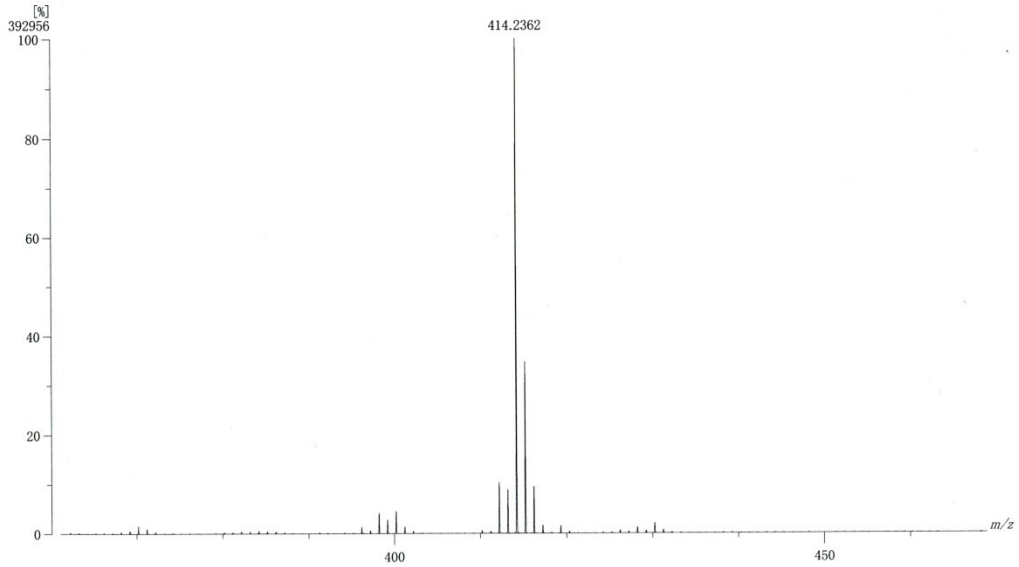

# HRMS (ESI+) of ASiP<sup>a</sup> 3

## [ Theoretical Ion Distribution ]

Molecular Formula : C<sub>22</sub> H<sub>28</sub> N<sub>3</sub> Si

(m/z 362.2053, MW 362.5699, U.S. 11.5)

Base Peak : 362.2053, Averaged MW : 362.5676(a), 362.5687(w)

| m/z      | INT.          |
|----------|---------------|
| 362.2053 | 100.0000***** |
| 363.2078 | 30.6346*****  |
| 364.2068 | 7.7873*****   |
| 365.2077 | 1.2624*       |
| 366.2097 | 0.1313        |
| 367.2123 | 0.0095        |
| 368.2150 | 0.0005        |

Data : 3-C22H28N3Si-HRFAB Date : 17-Aug-2018 09:22  
Instrument : MStation  
Sample : -  
Note : -  
Inlet : Direct Ion Mode : FAB+  
RT : 0.55 min Scan# : (1213)  
Elements : C 22/0, H 28/0, N 3/0, Si 1/0  
Mass Tolerance : 3mmu  
Unsaturation (U.S.) : -0.5 - 100.0

| Observed m/z | Int%   | Err [ppm / mmu] | U.S. Composition   |
|--------------|--------|-----------------|--------------------|
| 1 362.2050   | 100.00 | -0.7 / -0.3     | 11.5 C22 H28 N3 Si |
| 363.2035     | 34.82  |                 |                    |
| 379.1607     | 12.69  |                 |                    |
| 399.1285     | 19.72  |                 |                    |

## [ Mass Spectrum ]

Data : 3-C22H28N3Si-HRFAB Date : 17-Aug-2018 09:22  
Instrument : MStation  
Sample : -  
Inlet : Direct Ion Mode : FAB+  
Spectrum Type : Normal Ion [EF-Linear]

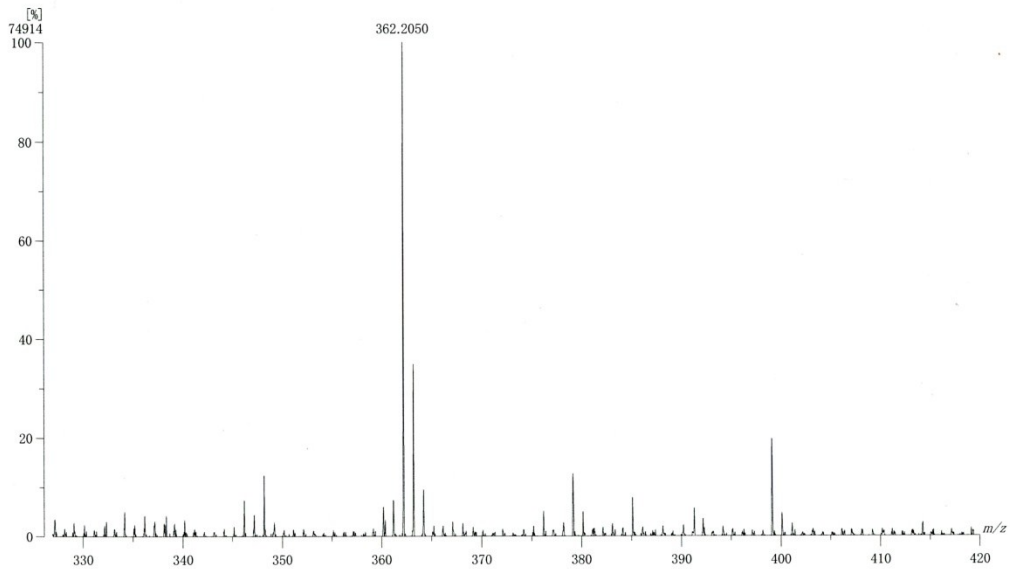

# HRMS (ESI<sup>+</sup>) of NIR-ASiP<sup>a</sup> 1

## [ Theoretical Ion Distribution ]

Molecular Formula : C<sub>28</sub> H<sub>34</sub> N<sub>3</sub> O<sub>2</sub> Si

(m/z 472.2420, MW 472.6824, U.S. 14.5)

Base Peak : 472.2420, Averaged MW : 472.6794 (a), 472.6804 (w)

| m/z      | INT.          |
|----------|---------------|
| 472.2420 | 100.0000***** |
| 473.2447 | 37.3842*****  |
| 474.2446 | 10.4466*****  |
| 475.2457 | 1.9991*       |
| 476.2475 | 0.2729        |
| 477.2497 | 0.0285        |
| 478.2521 | 0.0024        |
| 479.2545 | 0.0002        |

Data : 4-C28H34N3O2Si-HRFAB Date : 17-Aug-2018 09:26

Instrument : MStation

Sample : -

Note : -

Inlet : Direct Ion Mode : FAB+

RT : 0.40 min Scan# : (9.10)

Elements : C 28/0, H 34/0, N 3/0, O 2/0, Si 1/0

Mass Tolerance : 3mmu

Unsaturation (U.S.) : -0.5 - 100.0

| Observed m/z | Int%   | Err [ppm / mmu] | U.S. Composition      |
|--------------|--------|-----------------|-----------------------|
| 1 472.2422   | 100.00 | +0.4 / +0.2     | 14.5 C28 H34 N3 O2 Si |
| 473.2442     | 38.17  |                 |                       |
| 474.2467     | 13.25  |                 |                       |

## [ Mass Spectrum ]

Data : 4-C28H34N3O2Si-HRFAB Date : 17-Aug-2018 09:26

Instrument : MStation

Sample : -

Inlet : Direct Ion Mode : FAB+

Spectrum Type : Normal Ion [EF-Linear]

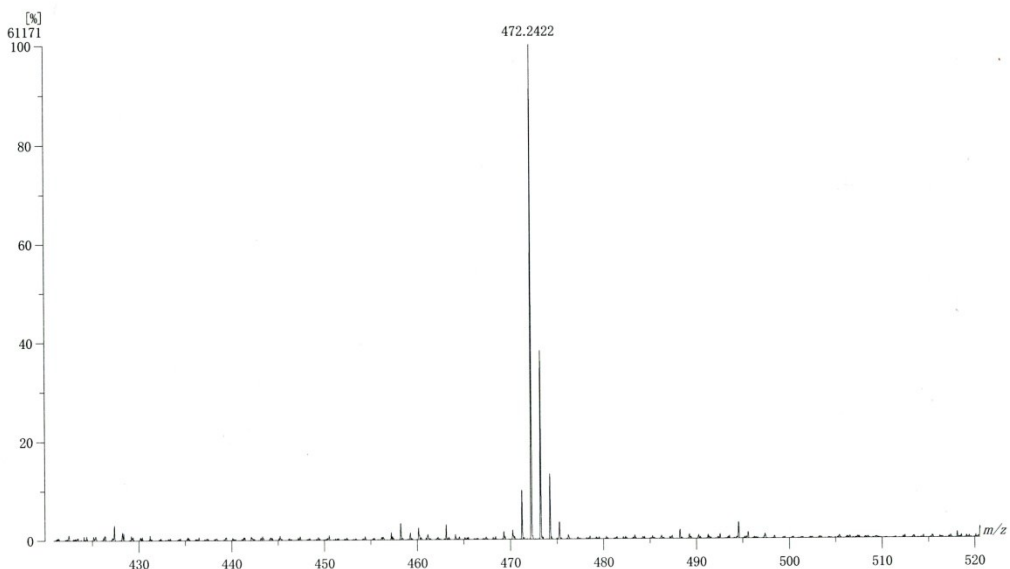

# HRMS (ESI<sup>+</sup>) of ASiP<sup>j</sup> 1

[ Theoretical Ion Distribution ]

Molecular Formula : C<sub>28</sub> H<sub>36</sub> N<sub>3</sub> Si

(m/z 442.2679, MW 442.6994, U.S. 13.5)

Base Peak : 442.2679, Averaged MW : 442.6964(a), 442.6975(w)

| m/z      | INT.          |
|----------|---------------|
| 442.2679 | 100.0000***** |
| 443.2705 | 37.3080*****  |
| 444.2704 | 10.0172*****  |
| 445.2712 | 1.8417*       |
| 446.2731 | 0.2308        |
| 447.2755 | 0.0208        |
| 448.2782 | 0.0014        |

Data: 5-C28H36N3Si-HRFAB Date: 17-Aug-2018 09:30  
Instrument: MStation  
Sample: -  
Note: -  
Inlet: Direct Ion Mode: FAB+  
RT: 0.60 min Scan#: (13,14)  
Elements: C 28/0, H 36/0, N 3/0, Si 1/0  
Mass Tolerance : 3mmu  
Unsaturation (U.S.): -0.5 - 100.0

| Observed m/z | Int%   | Err [ppm / mmu] | U.S. Composition   |
|--------------|--------|-----------------|--------------------|
| 1 440.2523   | 29.92  | +0.2 / +0.1     | 14.5 C28 H34 N3 Si |
| 2 442.2678   | 100.00 | -0.1 / -0.1     | 13.5 C28 H36 N3 Si |
| 443.2632     | 30.27  |                 |                    |
| 444.2685     | 11.20  |                 |                    |

[ Mass Spectrum ]  
Data: 5-C28H36N3Si-HRFAB Date: 17-Aug-2018 09:30  
Instrument: MStation  
Sample: -  
Inlet: Direct Ion Mode: FAB+  
Spectrum Type: Normal Ion [EF-Linear]

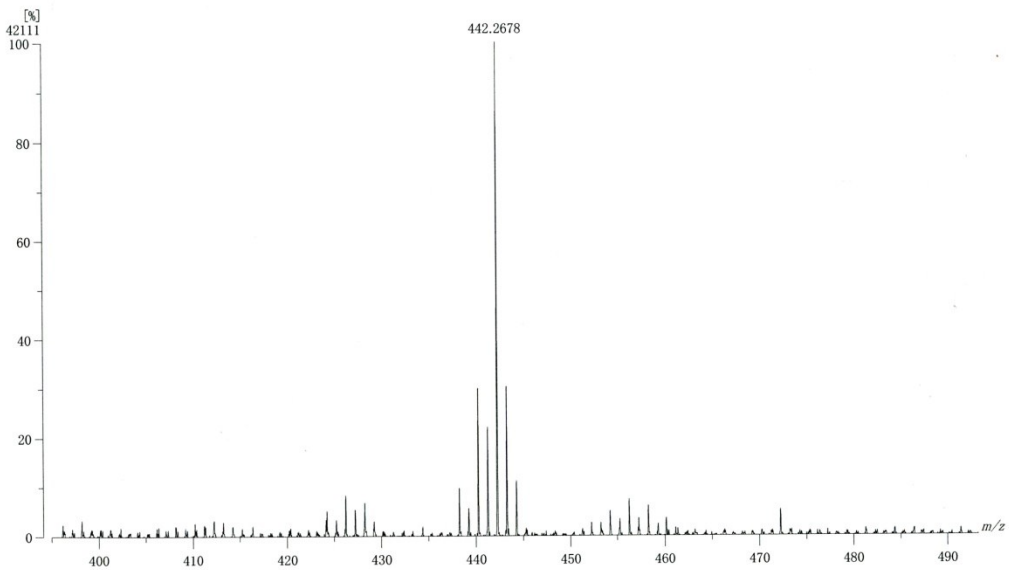



# HRMS (ESI<sup>+</sup>) of ASiP<sup>j</sup> 2

## [ Theoretical Ion Distribution ]

Molecular Formula : C<sub>34</sub> H<sub>40</sub> N<sub>3</sub> Si  
(m/z 518.2992, MW 518.7972, U.S. 17.5)  
Base Peak : 518.2992, Averaged MW : 518.7939(a), 518.7950(w)

| m/z      | INT.          |
|----------|---------------|
| 518.2992 | 100.0000***** |
| 519.3019 | 43.9814*****  |
| 520.3024 | 12.6925*****  |
| 521.3033 | 2.5822*       |
| 522.3051 | 0.3734        |
| 523.3074 | 0.0399        |
| 524.3100 | 0.0033        |
| 525.3128 | 0.0002        |

Date: 6-C34H40N3Si-HRFAB Date: 17-Aug-2018 09:35

Instrument: MStation

Sample: -

Note: -

Inlet: Direct Ion Mode: FAB+

RT: 0.55 min Scan#: (12,13)

Elements: C 34/0, H 40/0, N 3/0, Si 1/0

Mass Tolerance : 3mmu

Unsaturation (U.S.): -0.5 - 100.0

| Observed m/z | Int%   | Err [ppm / mmu] | U.S. Composition                                       |
|--------------|--------|-----------------|--------------------------------------------------------|
| 1 518.2989   | 100.00 | -0.5 / -0.3     | 17.5 C <sub>34</sub> H <sub>40</sub> N <sub>3</sub> Si |
| 519.3014     | 41.19  |                 |                                                        |
| 520.2899     | 14.66  |                 |                                                        |

## [ Mass Spectrum ]

Date: 6-C34H40N3Si-HRFAB Date: 17-Aug-2018 09:35

Instrument: MStation

Sample: -

Inlet: Direct Ion Mode: FAB+

Spectrum Type: Normal Ion [EF-Linear]

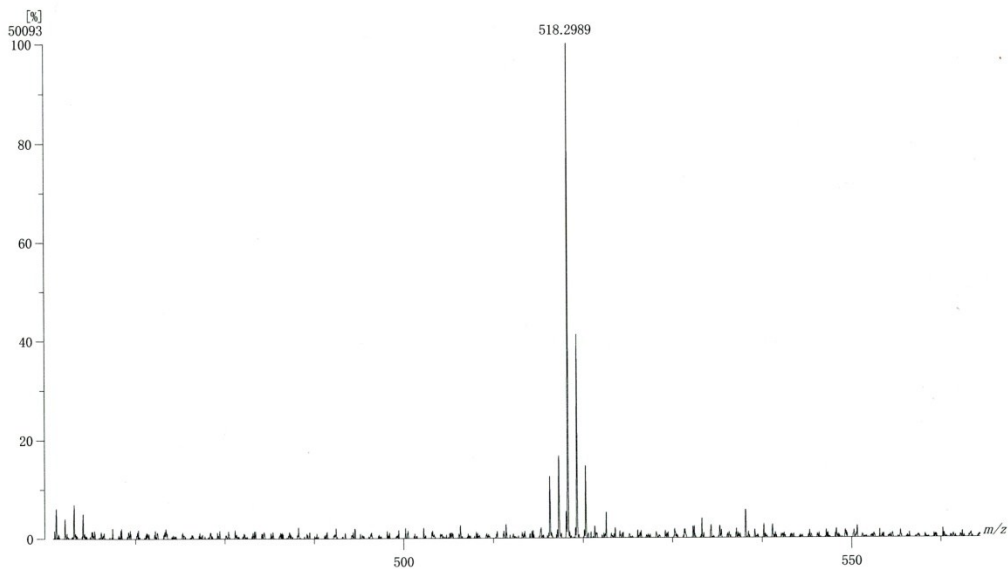

# HRMS (ESI<sup>+</sup>) of ASiP<sup>j</sup> 3

[ Theoretical Ion Distribution ]

Molecular Formula : C<sub>30</sub> H<sub>36</sub> N<sub>3</sub> Si

(m/z 466.2679, MW 466.7214, U.S. 15.5)

Base Peak : 466.2679, Averaged MW : 466.7185(a), 466.7196(w)

| m/z      | INT.          |
|----------|---------------|
| 466.2679 | 100.0000***** |
| 467.2705 | 39.5325*****  |
| 468.2706 | 10.8595*****  |
| 469.2715 | 2.0691*       |
| 470.2733 | 0.2730        |
| 471.2757 | 0.0262        |
| 472.2784 | 0.0019        |
| 473.2812 | 0.0001        |

Data: 7-C30H36N3Si-HRFAB Date: 17-Aug-2018 09:39

Instrument: MStation

Sample: -

Note: -

Inlet: Direct Ion Mode: FAB+

RT: 0.55 min Scan#: (12,13)

Elements: C 30/0, H 36/0, N 3/0, Si 1/0

Mass Tolerance : 3mmu

Unsaturation (U.S.): -0.5 - 100.0

| Observed m/z | Int%   | Err [ppm / mmu] | U.S. Composition   |
|--------------|--------|-----------------|--------------------|
| 1 464.2526   | 20.38  | +0.9 / +0.4     | 16.5 C30 H34 N3 Si |
| 2 465.2593   | 20.51  | -1.6 / -0.7     | 16.0 C30 H35 N3 Si |
| 3 466.2677   | 100.00 | -0.3 / -0.2     | 15.5 C30 H36 N3 Si |
| 467.2731     | 36.72  |                 |                    |
| 468.2702     | 10.12  |                 |                    |

[ Mass Spectrum ]

Data: 7-C30H36N3Si-HRFAB Date: 17-Aug-2018 09:39

Instrument: MStation

Sample: -

Inlet: Direct Ion Mode: FAB+

Spectrum Type: Normal Ion [EF-Linear]

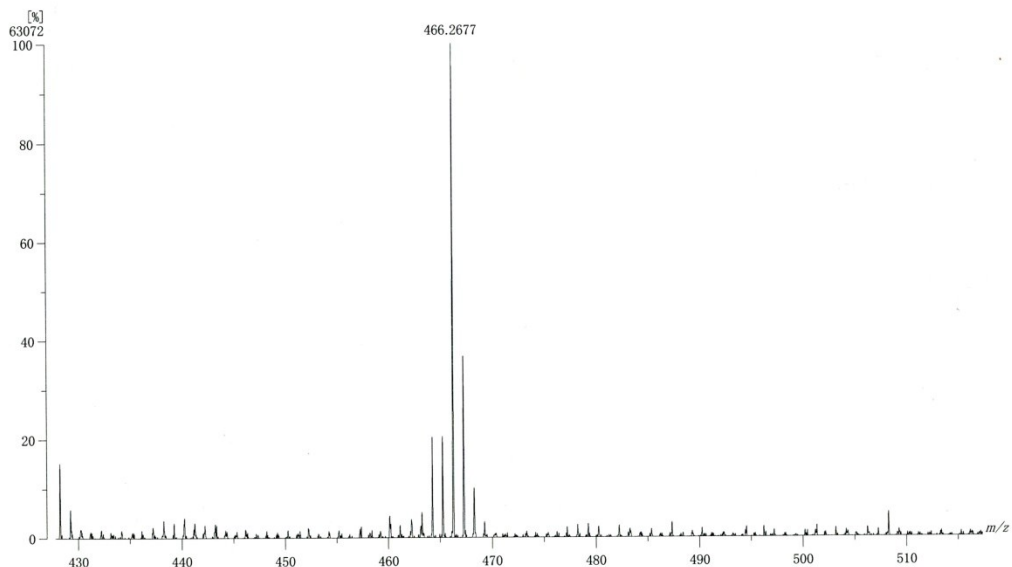

# HRMS (ESI<sup>+</sup>) of NIR-ASiP<sup>j</sup> 1

## [ Theoretical Ion Distribution ]

Molecular Formula : C<sub>36</sub> H<sub>42</sub> N<sub>3</sub> O<sub>2</sub> Si

(m/z 576.3046, MW 576.8339, U.S. 18.5)

Base Peak : 576.3046, Averaged MW : 576.8303(a), 576.8313(w)

| m/z      | INT.          |
|----------|---------------|
| 576.3046 | 100.0000***** |
| 577.3074 | 46.2821*****  |
| 578.3081 | 14.1194*****  |
| 579.3092 | 3.0658**      |
| 580.3110 | 0.4899        |
| 581.3132 | 0.0606        |
| 582.3155 | 0.0061        |
| 583.3180 | 0.0005        |

Data : 8-C36H42N3O2Si-HRFAB Date : 17-Aug-2018 09:43

Instrument : MStation

Sample : -

Note : -

Inlet : Direct Ion Mode : FAB+

RT : 0.55 min Scan# : (12,13)

Elements : C 36/0, H 42/0, N 3/0, O 2/0, Si 1/0

Mass Tolerance : 3mmu

Unsaturation (U.S.) : -0.5 - 100.0

| Observed m/z | Int%   | Err [ppm / mmu] | U.S. Composition      |
|--------------|--------|-----------------|-----------------------|
| 1 575.2974   | 21.45  | +1.0 / +0.6     | 19.0 C36 H41 N3 O2 Si |
| 2 576.3042   | 100.00 | -0.7 / -0.4     | 18.5 C36 H42 N3 O2 Si |
| 577.3061     | 44.59  |                 |                       |
| 578.3122     | 14.01  |                 |                       |

## [ Mass Spectrum ]

Data : 8-C36H42N3O2Si-HRFAB Date : 17-Aug-2018 09:43

Instrument : MStation

Sample : -

Inlet : Direct Ion Mode : FAB+

Spectrum Type : Normal Ion [EF-Linear]

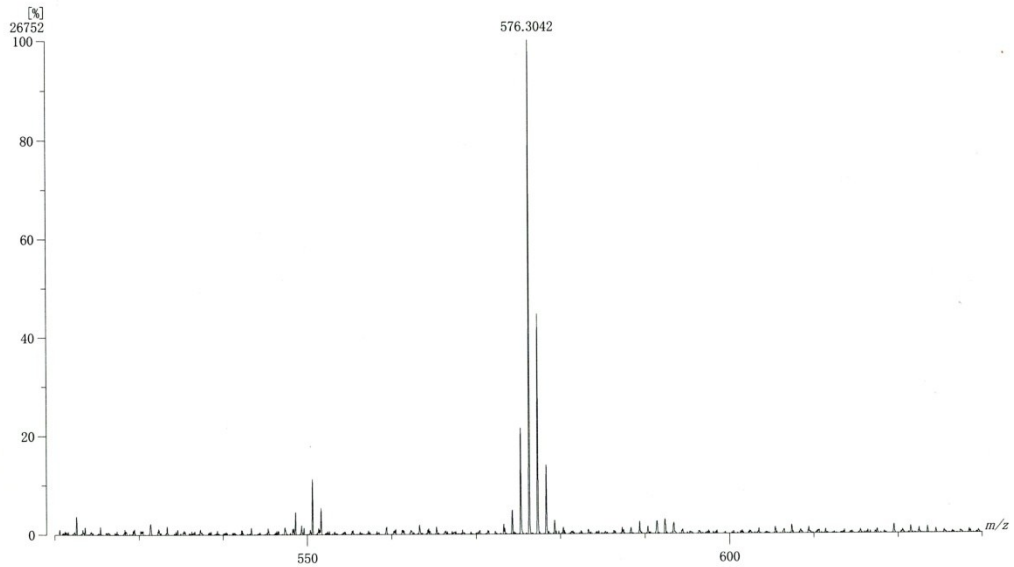

# HRMS (ESI<sup>+</sup>) of NIR-ASiP<sup>j</sup> 2

## [ Theoretical Ion Distribution ]

Molecular Formula : C<sub>30</sub> H<sub>38</sub> N<sub>3</sub> O Si

(m/z 484.2784, MW 484.7367, U.S. 14.5)

Base Peak : 484.2784, Averaged MW : 484.7334 (a), 484.7345 (w)

| m/z      | INT.          |
|----------|---------------|
| 484.2784 | 100.0000***** |
| 485.2811 | 39.5706*****  |
| 486.2812 | 11.0750*****  |
| 487.2822 | 2.1525*       |
| 488.2840 | 0.2956        |
| 489.2863 | 0.0304        |
| 490.2888 | 0.0025        |
| 491.2914 | 0.0002        |

Data : 9-C30H38N3OSi-HRFAB Date : 17-Aug-2018 09:47

Instrument : MStation

Sample : -

Note : -

Inlet : Direct Ion Mode : FAB+

RT : 0.50 min Scan# : (11,12)

Elements : C 30/0, H 38/0, N 3/0, O 1/0, Si 1/0

Mass Tolerance : 3mmu

Unsaturation (U.S.) : -0.5 - 100.0

| Observed m/z | Int%   | Err [ppm / mmu] | U.S. Composition     |
|--------------|--------|-----------------|----------------------|
| 1 483.2710   | 26.25  | +0.8 / +0.4     | 15.0 C30 H37 N3 O Si |
| 2 484.2781   | 100.00 | -0.7 / -0.3     | 14.5 C30 H38 N3 O Si |
| 485.2844     | 47.61  |                 |                      |
| 486.2882     | 12.84  |                 |                      |
| 487.3214     | 11.36  |                 |                      |

## [ Mass Spectrum ]

Data : 9-C30H38N3OSi-HRFAB Date : 17-Aug-2018 09:47

Instrument : MStation

Sample : -

Inlet : Direct Ion Mode : FAB+

Spectrum Type : Normal Ion [EF-Linear]

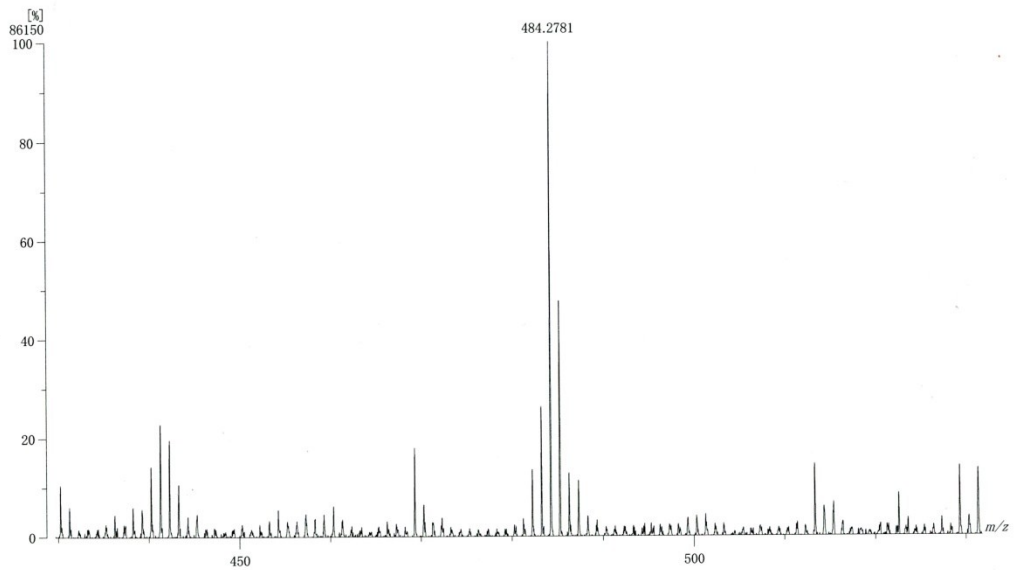

## HRMS (ESI<sup>+</sup>) of NIR-ASiP<sup>j</sup> 3

[ Theoretical Ion Distribution ]

Molecular Formula : C<sub>30</sub> H<sub>35</sub> F<sub>3</sub> N<sub>3</sub> O Si

(m/z 538.2502, MW 538.7081, U.S. 14.5)

Base Peak : 538.2502, Averaged MW : 538.7052(a), 538.7061(w)

| m/z      | INT.          |
|----------|---------------|
| 538.2502 | 100.0000***** |
| 539.2528 | 39.5706*****  |
| 540.2530 | 11.0750*****  |
| 541.2539 | 2.1525*       |
| 542.2558 | 0.2956        |
| 543.2580 | 0.0304        |
| 544.2605 | 0.0025        |
| 545.2631 | 0.0002        |

Data : 10-C30H35F3N3OSi-HRFAB Date : 17-Aug-2018 09:51

Instrument : MStation

Sample : -

Note : -

Inlet : Direct Ion Mode : FAB+

RT : 0.50 min Scan# : (11,12)

Elements : C 30/0, H 35/0, F 3/0, N 3/0, O 1/0, Si 1/0

Mass Tolerance : 3mmu

Unsaturation (U.S.) : -0.5 - 100.0

| Observed m/z | Int%   | Err [ppm / mmu] | U.S. Composition        |
|--------------|--------|-----------------|-------------------------|
| 1 537.2419   | 18.33  | -0.8 / -0.4     | 15.0 C30 H34 F3 N3 O Si |
| 2 538.2505   | 100.00 | +0.6 / +0.3     | 14.5 C30 H35 F3 N3 O Si |
| 539.2500     | 42.61  |                 |                         |
| 540.2519     | 11.53  |                 |                         |

[ Mass Spectrum ]

Data : 10-C30H35F3N3OSi-HRFAB Date : 17-Aug-2018 09:51

Instrument : MStation

Sample : -

Inlet : Direct Ion Mode : FAB+

Spectrum Type : Normal Ion [EF-Linear]

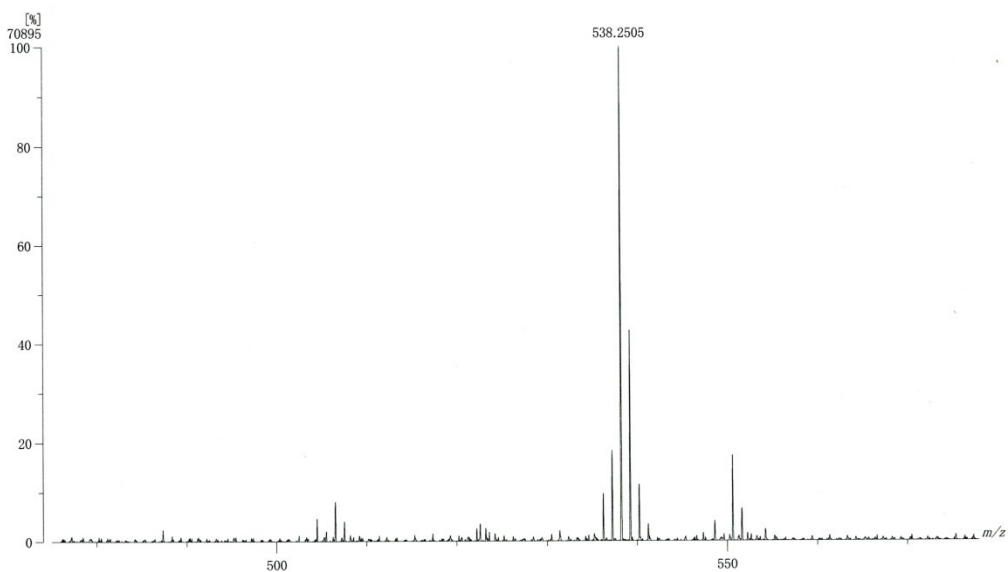

# HRMS (ESI<sup>+</sup>) of probe ASiP<sup>i</sup>-H<sub>2</sub>O<sub>2</sub>

[ Theoretical Ion Distribution ]

Molecular Formula : C<sub>42</sub> H<sub>53</sub> N<sub>3</sub> O<sub>4</sub> Si B

(m/z 702.3898, MW 702.7970, U.S. 19.5)

Base Peak : 702.3906, Averaged MW : 702.7922(a), 702.7934(w)

| m/z      | INT.          |
|----------|---------------|
| 701.3935 | 21.9518*****  |
| 702.3906 | 100.0000***** |
| 703.3931 | 50.7731*****  |
| 704.3941 | 16.7075*****  |
| 705.3954 | 3.9938**      |
| 706.3971 | 0.7283        |
| 707.3992 | 0.1061        |
| 708.4014 | 0.0128        |
| 709.4038 | 0.0013        |
| 710.4062 | 0.0001        |

Data: 11-C42H53BN3O4Si-HRFAB Date: 17-Aug-2018 09:55  
 Instrument: MStation  
 Sample: -  
 Note: -  
 Inlet: Direct Ion Mode: FAB+  
 RT: 0.80 min Scan#: (17,18)  
 Elements: C 42/0, H 53/0, N 3/0, O 4/0, Si 1/0, B 1/0  
 Mass Tolerance : 3mmu  
 Unsaturation (U.S.): -0.5 - 100.0

| Observed m/z | Int%   | Err[ppm / mmu] | U.S. Composition        |
|--------------|--------|----------------|-------------------------|
| 700.3800     | 14.57  |                |                         |
| 701.3922     | 39.01  |                |                         |
| 1 702.3903   | 100.00 | +0.7 / +0.5    | 19.5 C42 H53 N3 O4 Si B |
| 703.4031     | 58.12  |                |                         |
| 704.4001     | 18.90  |                |                         |

[ Mass Spectrum ]  
 Data: 11-C42H53BN3O4Si-HRFAB Date: 17-Aug-2018 09:55  
 Instrument: MStation  
 Sample: -  
 Inlet: Direct Ion Mode: FAB+  
 Spectrum Type: Normal Ion [EF-Linear]

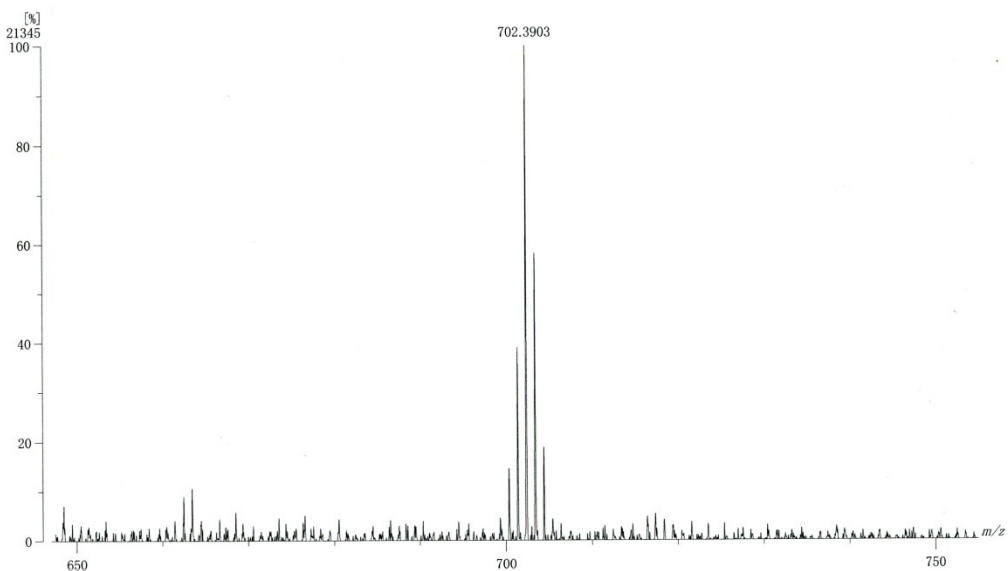

## LCMS analysis data for selected compounds

(The left data are MS values; the smaller peak came from m/2z)

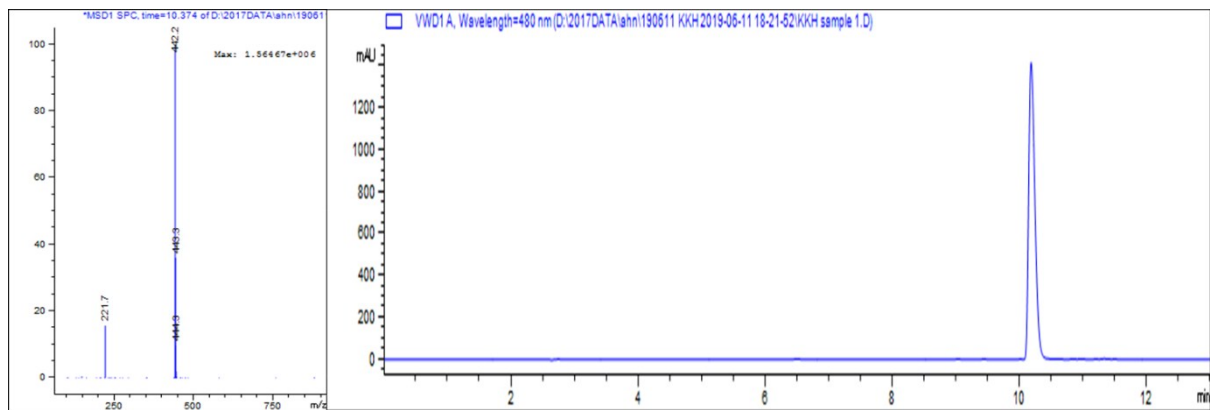

LCMS of ASiP' 1

LCMS of ASiP' 2

LCMS of ASiP' 3

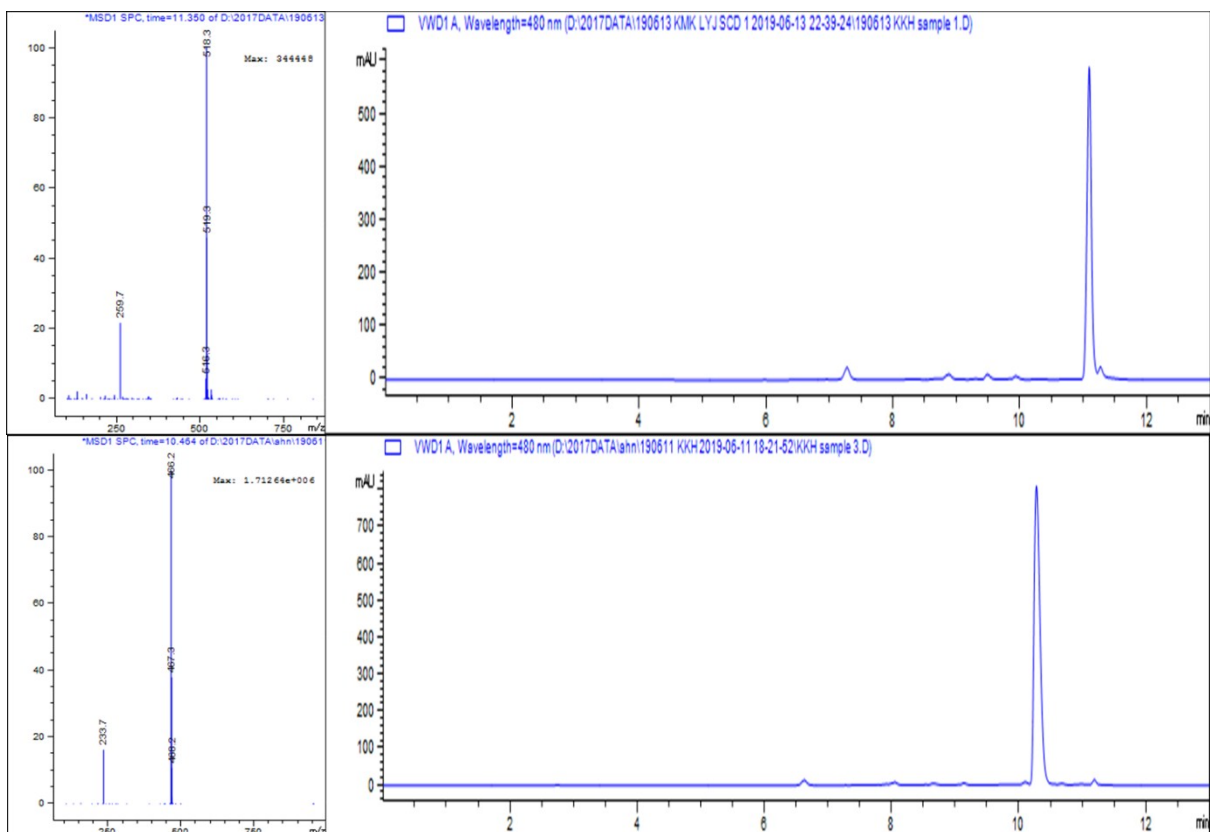

### LCMS of NIR-ASiP/ 1

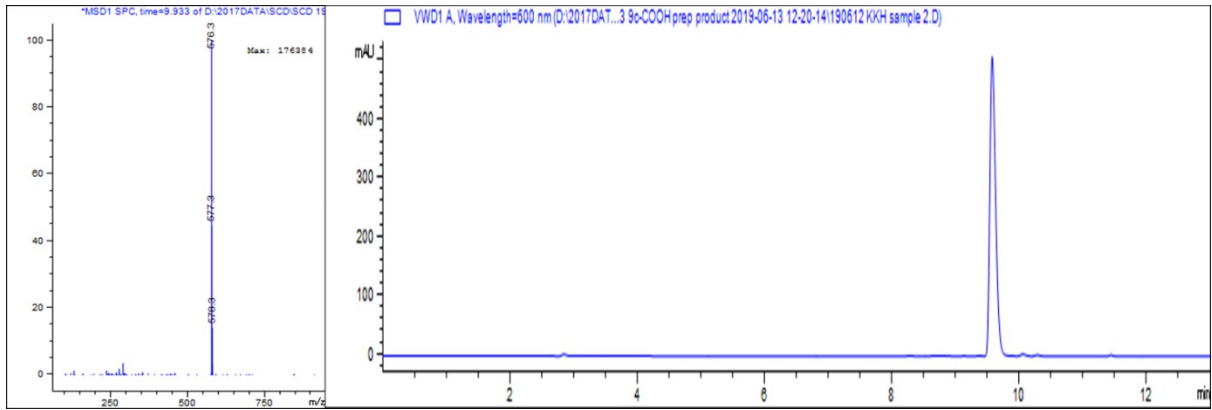

### LCMS of NIR-ASiP/ 2

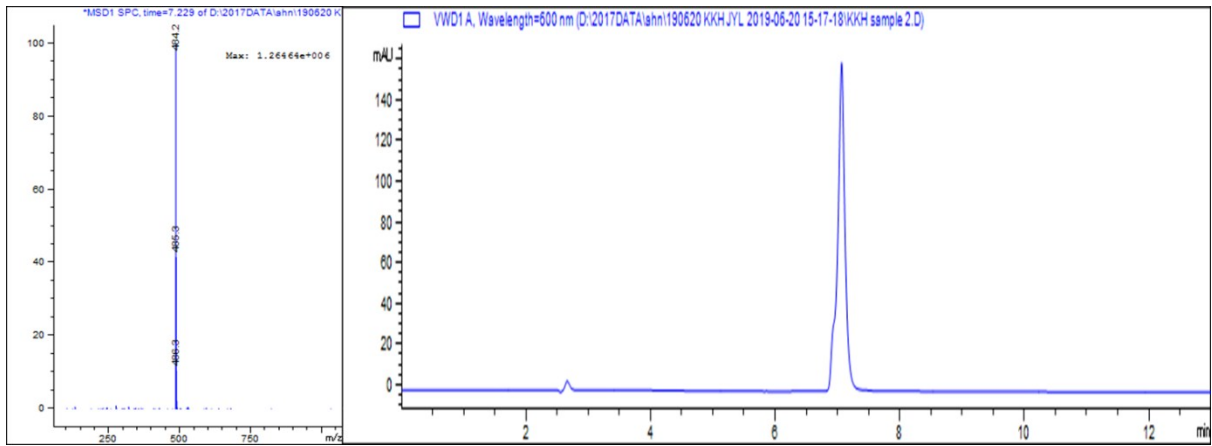

### LCMS of NIR-ASiP/ 3

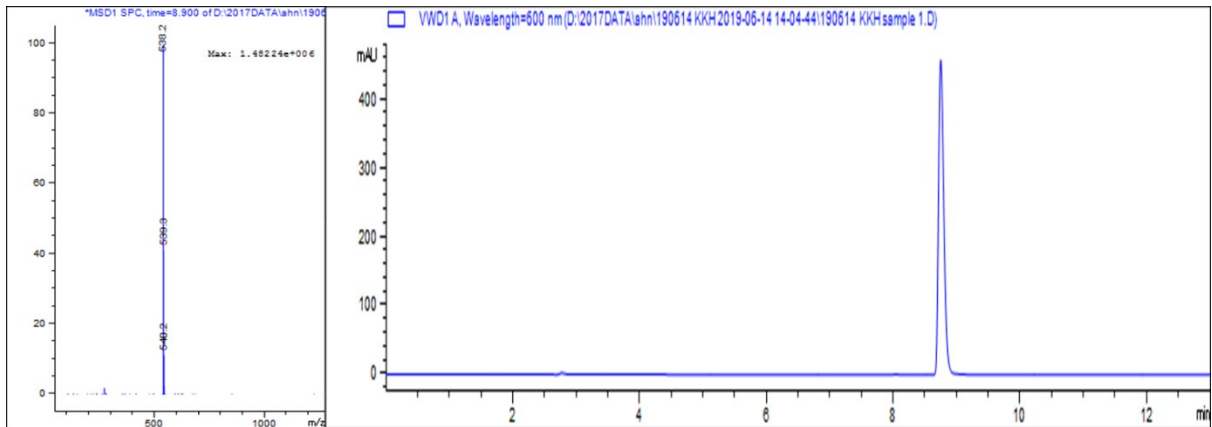

Supplement: c9sc02287b1.pdf [file c9sc02287b1.pdf]
